1 **A Spatiotemporal Notch Interaction Map from Membrane to Nucleus**

2

3 Alexandre P. Martin<sup>1</sup>, Gary A. Bradshaw<sup>2</sup>, Robyn J. Eisert<sup>1</sup>, Emily D. Egan<sup>1</sup>, Lena Tveriakhina<sup>1</sup>,  
4 Julia M. Rogers<sup>1</sup>, Andrew N. Dates<sup>1</sup>, Gustavo Scanavachi<sup>3,4</sup>, Jon C. Aster<sup>5</sup>, Tom Kirchhausen<sup>3,4</sup>,  
5 Marian Kalocsay<sup>6\*</sup>, Stephen C. Blacklow<sup>1,7,8\*</sup>

6

7 <sup>1</sup>Department of Biological Chemistry and Molecular Pharmacology, Blavatnik Institute, Harvard  
8 Medical School, Boston, MA 02115, USA.

9 <sup>2</sup>Department of Systems Biology, Laboratory of Systems Pharmacology, Harvard Medical  
10 School, Boston, MA 02115, USA.

11 <sup>3</sup>Department of Cell Biology, Harvard Medical School, Boston, MA 02115, USA.

12 <sup>4</sup>Program in Cellular and Molecular Medicine, Boston Children's Hospital, Boston, MA 02115,  
13 USA; Department of Pediatrics, Harvard Medical School, Boston, MA 02115, USA.

14 <sup>5</sup>Department of Pathology, Brigham and Women's Hospital, Boston, MA 02115, USA.

15 <sup>6</sup>Department of Experimental Radiation Oncology, University of Texas MD Anderson Cancer  
16 Center, Houston, TX 77030, USA.

17 <sup>7</sup>Department of Cancer Biology, Dana Farber Cancer Institute, Boston, MA 02215, USA.

18 <sup>8</sup>Lead contact

19

20 \*Correspondence: [mkalocsay@mdanderson.org](mailto:mkalocsay@mdanderson.org) (M.K.), [stephen\\_blacklow@hms.harvard.edu](mailto:stephen_blacklow@hms.harvard.edu)  
21 (S.C.B.)

22

23

24 **ABSTRACT**

25 Notch signaling relies on ligand-induced proteolysis to liberate a nuclear effector that drives cell  
26 fate decisions. The location and timing of individual steps required for proteolysis and movement  
27 of Notch from membrane to nucleus, however, remain unclear. Here, we use proximity labeling  
28 with quantitative multiplexed mass spectrometry to monitor the microenvironment of endogenous  
29 Notch2 after ligand stimulation in the presence of a gamma secretase inhibitor and then as a  
30 function of time after inhibitor removal. Our studies show that gamma secretase cleavage of  
31 Notch2 occurs in an intracellular compartment and that formation of nuclear complexes and  
32 recruitment of chromatin-modifying enzymes occurs within 45 minutes of inhibitor washout. This  
33 work provides a spatiotemporal map of unprecedented detail tracking the itinerary of Notch from  
34 membrane to nucleus after activation and identifies molecular events in signal transmission that  
35 are potential targets for modulating Notch signaling activity.

36

## 37 INTRODUCTION

38

39 Notch signaling is an essential and conserved mechanism of cell-cell communication that controls  
40 normal development and maintains adult tissue homeostasis in a wide range of tissues and organ  
41 systems (Hori et al., 2013; Siebel & Lendahl, 2017). Mutations in Notch signaling components  
42 result in several human developmental disorders such as Alagille syndrome, caused by loss of  
43 function mutations of either *NOTCH2* or *JAGGED1* (Kamath et al., 2012; Li et al., 1997),  
44 spondylocostal dysostosis (Turnpenny et al., 2003), and Hajdu-Cheney disease (Simpson et al.,  
45 2011). In addition, Notch mutations and/or deregulated Notch signaling are frequently found in  
46 cancer (Aster et al., 2016). Activating mutations of *NOTCH1* occur in more than 50% of T cell  
47 acute lymphoblastic leukemias (T-ALL), and similar activating mutations have been found in  
48 triple-negative breast cancer, adenoid cystic carcinoma, and tumors derived from pericytes or  
49 smooth muscle (Aster et al., 2016). On the other hand, Notch acts as a tumor suppressor in  
50 cutaneous squamous cell carcinomas (N. J. Wang et al., 2011), highlighting the complexities in  
51 targeting Notch for cancer therapy.

52 Notch proteins (Notch1-4 in mammals) are transmembrane receptors that transmit signals  
53 in response to canonical Delta-like or Jagged ligands (Jagged1, Jagged2, DLL1, DLL4) present on  
54 a signal-sending cell. Ligand binding initiates signal transduction by triggering a series of  
55 proteolytic cleavages of Notch in the receiver cell. The first ligand-induced cleavage is catalyzed  
56 by ADAM10 at a site called S2, external to the plasma membrane. S2-cleaved Notch molecules  
57 are then cleaved by gamma secretase at site S3, resulting in the release of the Notch intracellular  
58 domain (NICD). NICD subsequently translocates into the nucleus and forms a Notch transcription  
59 complex with the DNA-binding protein RBPJ and a MAML coactivator to induce the transcription  
60 of Notch target genes (see (Henrique & Schweisguth, 2019) and (Sprinzak & Blacklow, 2021) for  
61 recent reviews).

62 While these fundamental steps required for Notch signaling have been defined, it is less  
63 certain where gamma secretase cleavage takes place in the cell, whether NICD moves from  
64 membrane to nucleus by active or passive transport, and how long it takes NICD to migrate from  
65 membrane to nucleus after gamma secretase cleavage. Real-time luciferase complementation  
66 assays using ectopic expression of Notch1 and RBPJ fusion proteins have shown that immobilized  
67 ligand stimulation results in nuclear complementation between 30 – 60 min after removal of a

68 gamma secretase inhibitor (Ilagan et al., 2011), but analogous experiments have not been carried  
69 out at endogenous protein abundance. Previous reports have also reached different conclusions,  
70 for example, about whether gamma secretase cleavage occurs at the plasma membrane (Chyung  
71 et al., 2005; Hansson et al., 2005) or in an intracellular compartment (Chapman et al., 2016; Gupta-  
72 Rossi et al., 2004; Kobia et al., 2014).

73 To address these questions, we mapped the microenvironment of NICD and characterized  
74 its interactions with effectors within a native cellular environment at endogenous expression levels  
75 after ligand stimulation in the presence of a gamma secretase inhibitor (GSI) and then as a function  
76 of time after inhibitor removal. We used CRISPR/Cas9 genome editing in SVG-A cells to fuse the  
77 Notch2 receptor to the engineered ascorbate peroxidase APEX2, which rapidly produces short-  
78 lived biotin-tyramide radicals that label proteins within a small radius (~ 20 nm) and that can be  
79 rapidly quenched (Hung et al., 2016; Lam et al., 2015; Rhee et al., 2013). We performed proximity  
80 labeling of the Notch2 microenvironment after ligand stimulation in the presence of a GSI and at  
81 different timepoints after inhibitor washout to identify changes in protein enrichment as a function  
82 of time by quantitative multiplexed proteomics. The dynamics of labeling enrichment of distinct  
83 plasma membrane, cytosolic, and nuclear proteins define the microenvironment of Notch2-APEX2  
84 during its passage from the plasma membrane to the nucleus. Our studies show that gamma  
85 secretase cleavage of Notch2 to produce NICD2 occurs in an intracellular compartment, that  
86 passage of NICD2 through the cytoplasm is associated with transient enrichment of membrane  
87 cortical and cytoskeletal proteins, and that formation of nuclear complexes and recruitment of  
88 chromatin-modifying enzymes occurs within 45 minutes of inhibitor washout. This work provides  
89 a spatiotemporal map of unprecedented detail tracking the itinerary of Notch from membrane to  
90 nucleus after metalloprotease cleavage and uncovers events in signal transmission that are  
91 potential targets for modulating Notch activity.

92

## 93 **RESULTS**

94

### 95 **System validation and genome engineering for Notch2 proximity labeling in SVG-A cells**

96 To track the movement of Notch as a function of time in response to signal induction, we  
97 labeled proteins in the Notch microenvironment using a Notch2-APEX2 ascorbate peroxidase  
98 fusion protein (Martin et al., 2019; May et al., 2021; Paek et al., 2017). We investigated the

99 response associated with the Notch2/Jagged1 (Jag1) receptor-ligand pair because this pairing  
100 transmits signals that are required for normal development (Siebel & Lendahl, 2017), as  
101 highlighted by Alagille syndrome, a multiorgan disorder caused by loss-of-function mutations in  
102 either *NOTCH2* or *JAGGED1* (Kamath et al., 2012; Li et al., 1997). To achieve the precise  
103 synchronization necessary for time-resolved proximity labeling, we used immobilized Jag1 as an  
104 activating ligand in concert with potent, specific gamma secretase inhibitors, the effects of which  
105 can be rapidly reversed by simple washout (Bailis et al., 2014). We selected SVG-A human fetal  
106 astrocytes as our receptor-expressing cells (“Notch” or “receiver” cells) because they express  
107 abundant Notch2 endogenously and express low amounts of the other Notch receptors. We  
108 confirmed that Notch2 is responsible for the Notch transcriptional response in these cells by  
109 knocking out Notch2 using CRISPR/Cas9 genome editing (Ran et al., 2013): the absence of  
110 Notch2 effectively abolishes Notch reporter gene activity in a signaling assay using immobilized  
111 Jag1 as ligand (Figure S1A-B), confirming both that these cells are responsive to Jag1 and that the  
112 reporter signal in these cells is a consequence of Notch2 activation.

113 To ensure that our studies were performed at natural receptor abundance, we used  
114 CRISPR/Cas9 to add an APEX2-HA coding sequence to the 3’ end of *NOTCH2*, creating a fusion  
115 gene at the endogenous locus encoding Notch2 fused to APEX2-HA at its C-terminus (Figure S1).  
116 The cassette for homologous recombination also contained a T2A sequence followed by a  
117 sequence encoding the mNEONGreen fluorescent protein, allowing us to isolate single cells  
118 positive for the desired genomic insertion by FACS. We confirmed that the Notch2-APEX2-HA  
119 fusion protein matures similarly to wild-type Notch2 in parental cells (Figure S1D), retains  
120 signaling activity in response to immobilized Jag1 comparable to wild-type Notch2 in a reporter  
121 gene assay, and is silenced similarly to wild-type Notch2 by inhibitors of ADAM10 and gamma  
122 secretase cleavage (Figure S1E). Western blot analysis also confirmed that biotinylation of  
123 proteins across a wide range of molecular weights was only observed in cells carrying the APEX2  
124 fusion protein (Figure S1F).

125

### 126 **Time-resolved Notch2 proximity labeling with the APEX2 fusion protein**

127 We cultured Notch2-APEX2-HA knock-in cells on plates containing immobilized Jag1  
128 (Delaney et al., 2005; Gordon et al., 2015; Varnum-Finney et al., 2003) overnight in the presence  
129 of the gamma secretase inhibitor Compound E (GSI) and analyzed protein biotinylation as a

130 function of time after GSI washout by mass spectrometry (Figure 1A-B). A condition without  
131 ligand served as a reference to determine how the Notch2 microenvironment is affected by ligand-  
132 induced metalloprotease cleavage in the presence of GSI (Figure 1B). We confirmed that GSI  
133 washout resulted in accumulation of S3-processed NICD2 molecules over a two-hour time course  
134 (Figure S2A), performed proximity labeling using biotin phenol and hydrogen peroxide at various  
135 time points up to 2 h, and by Western blot observed specific labeling of cohorts of biotin-labeled  
136 proteins that changed with time (Figure S2B).

137 Mass spectrometry (MS) analysis of biotinylated proteins labeled by Notch2-APEX2  
138 (Figure S3A) determined the temporal profiles of labeling for 980 proteins, which displayed  
139 different dynamic labeling patterns after Notch activation. The high correlation between replicates  
140 (Figure S3B) and the clustering of replicates in principal component analysis (Figure S3C) attests  
141 to the reproducibility of our experimental system. When referenced to the t=0 timepoint, the  
142 transcriptional coactivator MAML1, an essential component of the Notch transcriptional complex  
143 (Petcherski & Kimble, 2000; Wu et al., 2000), was not significantly enriched at early timepoints  
144 after GSI washout (<30 min) but became the most significantly enriched protein two hours after  
145 GSI washout. This observation confirmed nuclear translocation of NICD2 after GSI removal and  
146 highlighted the dynamic nature of the NICD2 microenvironment as a function of time. We also  
147 note that our MS workflow did not identify all known Notch associated proteins in this study, as  
148 MS proteomics often does not capture all protein analytes present. For example, RBPJ, the  
149 transcription factor bound by NICD in the transcriptional activation complex, was not detected,  
150 even though RBPJ was indeed biotinylated as early as 30 min after GSI washout with a peak of  
151 relative abundance at 2 h after washout, as judged by Western blot (Figure S3D).

152 Hierarchical clustering of the relative abundance of each labeled protein as a function of  
153 time led to the identification of several distinct patterns of enrichment based on Ward's hierarchical  
154 clustering method (Figure 1C). Prominent among these enrichment patterns are seven discrete  
155 classes of proteins, including those with maximum labeling: i) in the absence of ligand, ii) with  
156 ligand in the presence of GSI, iii) early (2-5 min) in the washout time course (Figure 1D), or iv) 2  
157 h after washout (Figure 1E). There are also proteins that are not labeled in the absence of ligand  
158 and show a sustained labeling pattern in the presence of ligand throughout the time course (Figure  
159 1F), as well as a cluster of proteins that show enrichment both in the presence of GSI and at late

160 time points after washout. Full quantification data for proteins identified in this dataset are found  
161 in [Table S1](#).

162

### 163 **Notch2 is internalized after S2 but before S3 cleavage**

164 Not surprisingly, the first cluster, which exhibits maximum labeling enrichment in the  
165 absence of immobilized ligand (*i.e.* when Notch is unstimulated; [Figure 1C](#)), is characterized by  
166 proteins that reside at the plasma membrane ([Figure 2A-B](#)), where Notch encounters its  
167 transmembrane ligands present on neighboring cells. This group of proteins includes EGFR  
168 (Epidermal growth factor receptor), ERBB2 (Receptor tyrosine-protein kinase erbB-2), ERBIN  
169 (Erbin), GPRC5A (Retinoic acid-induced protein 3), DBN1 (Drebrin), and surface-associated  
170 proteins such as the catenins CTNNB1 and CTNND1.

171 In the presence of GSI, ligand binding induces metalloprotease cleavage, but gamma  
172 secretase catalyzed cleavage at S3 is blocked, preventing liberation of NICD2 from the membrane.  
173 Remarkably, when GSI is present, plasma-membrane associated proteins, which are enriched in  
174 the first cluster when ligand is not present, become depleted when compared to unstimulated cells  
175 ([Figure 2C](#)). Instead, proteins that exhibit maximal enrichment in their proximity to Notch2 after  
176 ligand exposure in the presence of GSI are predominantly associated with vesicular or endosomal  
177 compartments and the endocytic machinery ([Figure 2C-E](#)). Core components participating in  
178 clathrin-mediated endocytosis including clathrin, AP-2, dynamin, and EPS15 are enriched  
179 ([Figures 1F and 2D](#)) as is the transferrin receptor, which enters cells through CME, and other  
180 proteins implicated in vesicular trafficking such as EHD1, SEC22B, and SNX3 ([Figure 2C-E](#)). In  
181 addition, there is a substantial enrichment of vesicle-associated TMED (transmembrane emp24  
182 domain) proteins upon ligand stimulation ([Figure 2C-D](#)), specifically TMEM165, TMEM43,  
183 VAPA, and VAPB, two vesicle-associated proteins (Aber et al., 2019; Seaman, 2012), also show  
184 maximum enrichment in the presence of GSI ([Figure 2D](#)). Another group of proteins showed  
185 labeling enrichment in the presence of GSI that persisted after washout ([Figure 2D](#)). This group  
186 includes proteins related to endocytosis and vesicular trafficking, as well as the amyloid-beta  
187 precursor protein (APP; [Figure 2D](#)), a well-known substrate of the gamma secretase complex  
188 (Chow et al., 2010). Finally, proteins related to endocytosis and components of the clathrin-  
189 mediated endocytic machinery ([Figure 2D](#)) exhibited a significant increase in abundance upon  
190 ligand stimulation, with variable enrichment after GSI washout ([Figures 1F and 2D](#)).

191 The comparison between the no ligand and GSI conditions suggests that Notch2 undergoes  
192 internalization after ligand-induced ADAM10 cleavage has occurred at site S2. To evaluate this  
193 possibility using a complementary approach, we monitored the subcellular localization of Notch2  
194 by immunofluorescence after washout of GI254023X (GI25X), a potent ADAM10 inhibitor  
195 (Ludwig et al., 2005), in the absence or presence of the dynamin inhibitor hydroxy-dynasore,  
196 which blocks endocytosis (Kirchhausen et al., 2008; Macia et al., 2006; McCluskey et al., 2013).  
197 Cells were incubated overnight on immobilized Jagged1 in the presence of GI25X, and the  
198 inhibitor was then removed to allow S2 cleavage of ligand-bound Notch2 in the absence or  
199 presence of hydroxy-dynasore. As anticipated, washout of GI25X in the absence of the dynamin  
200 inhibitor resulted in nuclear accumulation of NICD2 by 2 h after washout (Figure 3A-C),  
201 indicating that S2 cleavage, S3 cleavage, and nuclear translocation had occurred. However,  
202 washout of GI25X in the presence of hydroxy-dynasore significantly impaired the nuclear  
203 accumulation of NICD2 (Figure 3A-C). In addition, the inhibition of endosomal acidification by  
204 bafilomycin-A1 (BafA1), a specific vacuolar H<sup>+</sup>-ATPase inhibitor (Vaccari et al., 2010; Xu et al.,  
205 2003; Yoshimori et al., 1991), or by chloroquine (Mauthe et al., 2018), also impaired Notch2  
206 nuclear accumulation after GI25X washout (Figure 3A-C), further suggesting that S3 cleavage  
207 required access to an acidified intracellular compartment. Importantly, none of these inhibitors  
208 significantly modified the subcellular localization of unstimulated Notch2 (Figure S4A),  
209 consistent with the conclusion that they act after ligand-induced S2 cleavage of Notch2.

210 The generation of the S3-cleaved form of Notch2 (NICD2) after GI25X washout was also  
211 evaluated by Western blotting, using an antibody that specifically recognizes the N-terminal  
212 epitope of NICD2 (Shanmugam et al., 2021). As expected, washout of GI25X resulted in an  
213 increase in NICD2 abundance that was greatly impaired by inhibition of endocytosis or vesicular  
214 acidification (Figure 3D-E). Finally, the effect of inhibiting endocytosis or vesicular acidification  
215 on Notch transcriptional activity was investigated using a well-characterized luciferase reporter  
216 assay (Aster et al., 2000; Rogers et al., 2020; Wu et al., 2000). Washout of GI25X induced a Notch-  
217 dependent transcriptional response that was substantially reduced by the presence of hydroxy-  
218 dynasore, BafA1, or chloroquine (Figure 3F). In contrast, however, when the same approach was  
219 used to wash out GSI, NICD2 accumulated in the nucleus after 2 h, whether or not an endocytosis  
220 or acidification inhibitor was present (Figures 3G-H and S4B), placing the step requiring  
221 endocytosis between S2 and S3 cleavage. Importantly, this sensitivity extends to other members



222 of the Notch receptor family, as NICD1 generation was also reduced in SVG-A cells upon the  
223 inhibition of endocytosis or vesicular acidification after GI25X washout (Figure S5A). Moreover,  
224 this sensitivity is cell line independent, as inhibitors of endocytosis or vesicular acidification  
225 reduced the generation of both NICD1 and NICD2 in 293T cells (Figure S5B), U2OS cells (Figure  
226 S5C), HeLa cells (Figure S5D), and U251 cells (Figure S5E). These results argue that bound ligand  
227 induces metalloprotease cleavage at S2 at the cell surface, and that the S2-cleaved form of Notch2  
228 is then internalized to an intracellular compartment where it is cleaved by gamma secretase,  
229 thereby allowing NICD2 to access the nucleus.

230

### 231 **Passage of NICD2 from membrane to nucleus**

232 In our dataset we identified a class of proteins whose relative abundance increases shortly after  
233 GSI washout (2 - 5 minutes) (Figure 1C-D). Among the proteins in this cluster, we detected the  
234 ERM proteins ezrin (EZR), radixin (RDX), and moesin (MSN), which play a role in linking  
235 membranes to the actin cytoskeleton (Fehon et al., 2010; Louvet-Vallée, 2000) (Figure 4A-B). In  
236 addition to their architectural role, ERM proteins have been implicated in the maturation of  
237 endosomes and trafficking of EGFR (Chirivino et al., 2011). These results indicate that a pool of  
238 NICD2 molecules relocates to an ERM enriched microenvironment upon or immediately after  
239 gamma secretase cleavage to generate NICD2.

240 At the 15 min time point after inhibitor washout, the enrichment of ERM proteins has  
241 abated and there is a period when relatively few proteins show an enrichment in labeling greater  
242 than two-fold when compared to baseline labeling in the presence of GSI (Figure 4C). This time  
243 point is characterized by a mild increase in labeling of motor and cytoskeletal proteins, suggesting  
244 that NICD2 is primarily cytoplasmic and diffusing passively to the nucleus. Starting with the 5 -  
245 15 min time window, there is also enrichment of proteins that participate in nuclear import of cargo  
246 (Wälde et al., 2012; Yokoyama et al., 1995) (Figure 4D), including the importin-beta subunit  
247 KPNB1 (Cautain et al., 2015) and its associated adaptor Importin-7, as well as subunits of  
248 importin-alpha (KPNA1, KNPA2, and KPNA6) and the nuclear pore protein RANBP2 (also called  
249 Nup358).

250

### 251 **NICD2 is nuclear and is associated with active transcription within 2 h**

252 Several proteins exhibited a late labeling pattern with a strong peak enrichment at 2 h (Figure 5A-  
253 B). MAML1, a component of Notch transcriptional complexes (Nam et al., 2006; Petcherski &  
254 Kimble, 2000; Wu et al., 2000), was the most significantly enriched protein at this time point when  
255 compared to the baseline GSI condition (Figure 5A), indicative of NICD2 nuclear entry (Figure  
256 5A). Analysis of the kinetics of MAML1 enrichment showed that increased labeling began at 30  
257 min and was maximal by the 2 h timepoint (Figure 1E).

258 Strikingly, most of the other proteins showing significant, robust enrichment by 2 h are  
259 also implicated in transcription regulation or chromatin modification or remodeling (Figure 5A-  
260 B). Hierarchical clustering revealed that the pattern of enrichment seen for MAML1 is shared by  
261 other transcriptional regulators, including RAI1, TCF20, and FUBP1 (Figure 5B). Likewise,  
262 ARID1A and ARID1B of the SWI/SNF chromatin remodeling complex exhibited the same  
263 dynamics of labeling enrichment in this experiment. A similar time course of enrichment was also  
264 observed for the proteins FUS and EWSR1, two FET proteins that enter nuclear condensates and  
265 can influence transcription, and for several HNRNP proteins implicated in the regulation of  
266 splicing (Mittal & Roberts, 2020) (Figure 5B). Together, these data indicate that NICD2 has  
267 initiated the induction of a transcriptional response as early as 30 min after GSI washout and that  
268 the response is robust within 2 h, consistent with other reports showing that dynamic Notch binding  
269 sites in the genome become loaded with NICD and other co-factors within 2 h (Fryer et al., 2004;  
270 Fryer et al., 2002; Mittal & Roberts, 2020; Pillidge & Bray, 2019).

271 In an effort to further refine the temporal sequence of association of nuclear factors with  
272 NICD2, we acquired a second proximity labeling dataset focusing on timepoints between 30 min  
273 and 4 h after GSI washout (Figures 5C and S6A-B). In this experiment, MAML1, CREBBP/p300,  
274 the nuclear factor 1 C-type NFIC, and proteins of the BAF chromatin remodeling complex (Figure  
275 5D-F) show enrichment by the 45 min timepoint, reaching maximum enrichment at the 2 h and 4  
276 h timepoints (see Table S2 for full quantification data of all proteins identified in this dataset).  
277 Enrichment of other transcriptional regulators (*e.g.*, RAI1), HNRNPs and FET proteins begins  
278 shortly afterwards, at 1 h (Figure 5G), indicative of the presence of NICD2 at loci of active  
279 transcription by this timepoint.

280

## 281 DISCUSSION

282 Here, we performed Notch2-APEX2 time-resolved proximity labeling coupled with quantitative  
283 multiplexed proteomics to track the molecular microenvironment of endogenous Notch2 as a  
284 function of time after ligand stimulation and washout of a gamma secretase inhibitor. This  
285 unbiased approach allowed us to measure dynamic changes in the proteins in proximity to Notch  
286 before and after cleavage by gamma secretase, investigate the path and mode of transport of  
287 activated Notch2 from the plasma membrane to the nucleus, and define the nuclear  
288 microenvironment of NICD2 during transcriptional induction.

289 Several new mechanistic findings emerged from these studies. First, the enrichment of  
290 proteins associated with vesicular transport and endocytosis after ligand exposure in GSI-treated  
291 cells suggested that gamma secretase cleavage of Notch2 occurs in an intracellular compartment.  
292 This conclusion was supported by additional experiments tracking gamma secretase cleavage  
293 activity after washout of inhibitors of ligand-dependent metalloprotease (S2) cleavage in the  
294 presence of inhibitors of endocytosis or vesicle acidification, which showed that S2-processed  
295 Notch2 must enter an intracellular compartment to be cleaved by gamma secretase. Whereas older  
296 studies have reached differing conclusions about whether gamma secretase processes substrates at  
297 the plasma membrane (Chyung et al., 2005; Hansson et al., 2005) or in an intracellular  
298 compartment (Chapman et al., 2016; Gupta-Rossi et al., 2004; Kobia et al., 2014), our finding that  
299 gamma secretase cleavage of Notch2 occurs in an intramembrane compartment agrees with recent  
300 proteomics studies investigating APP cleavage using affinity capture of the early endosome-  
301 associated protein EEA, in which APP/A $\beta$  cleavage products of gamma secretase accumulate in  
302 early/sorting endosomes (Park et al., 2022).

303 Second, our data suggest that Notch2 molecules transiently pass through a  
304 microenvironment enriched in ERM proteins between 2-5 min after GSI washout. These proteins  
305 appear to identify a compartment traversed by Notch2 upon or immediately after gamma secretase  
306 cleavage to generate NICD2. In comparison, few proteins are enriched at the 15 and 30 min time  
307 points, consistent with the idea that NICD2 moves by passive diffusion to the nucleus after gamma  
308 secretase cleavage, with a possible preference for migration in proximity to or along actin  
309 filaments.

310 Third, we find that NICD2 enters a nuclear microenvironment enriched in components  
311 associated with a transcriptional response as early as 30-45 min after GSI washout and persists  
312 through the final 4 h timepoint. This timing of transcriptional induction is consistent with previous

313 real-time luciferase complementation studies using ectopic Notch1 and RBPJ expression (Ilagan  
314 et al., 2011) and with the onset and duration of Notch-induced transcription in fly models and in  
315 cancer cells (Castel et al., 2013; Faló-Sanjuán & Bray, 2022; Housden et al., 2013; Wang et al.,  
316 2014). In addition to MAML1, the nuclear proteins most rapidly recruited to NICD2 are  
317 CREBBP/p300, a well-established partner of MAML1 in NICD-dependent transcriptional  
318 induction (Fryer et al., 2004; Fryer et al., 2002; Oswald et al., 2001; Wallberg et al., 2002), and  
319 components of the BAF chromatin remodeling complex. Strikingly, the SWI/SNF chromatin  
320 remodeling complex is crucial to render enhancers responsive to Notch in *Drosophila* (Pillidge &  
321 Bray, 2019); the basis for recruitment of the BAF complex to Notch-responsive elements should  
322 be fertile ground for future study.

323         Together, our proximity labeling studies and follow-up cellular assays serve as the basis  
324 for a well-defined spatiotemporal model of the pathway traversed by Notch upon proteolytic  
325 activation (Figure 6). Ligand engagement first induces S2 cleavage of Notch at the cell surface,  
326 followed by entry of truncated Notch2 into an endocytic compartment for cleavage by gamma  
327 secretase. As early as 30 min after gamma secretase cleavage, NICD enters the nucleus and by 45  
328 min has begun to recruit CREBBP/p300 and chromatin remodeling complexes to initiate  
329 transcription of responsive genes, with evidence for recruitment of proteins involved in  
330 transcription-coupled splicing events after 60 – 90 min. More broadly, our work with Notch as a  
331 signaling protein of interest represents a proof-of-concept for future quantitative analyses of other  
332 signal transduction systems, showing that time-resolved proximity labeling with APEX2  
333 combined with multiplexed proteomics can elucidate the temporal and spatial dynamics of  
334 endogenous proteins and the evolution of their microenvironments during signaling.

335

336 **MATERIALS & METHODS**

337

338 **Key Resources Table**

| <b>Reagent type</b> | <b>Designation</b>                                                      | <b>Source of reference</b> | <b>Identifiers</b>                  | <b>Additional information</b>                       |
|---------------------|-------------------------------------------------------------------------|----------------------------|-------------------------------------|-----------------------------------------------------|
| Antibody            | Mouse monoclonal anti $\beta$ -Tubulin (clone D3U1W)                    | Cell Signaling Technology  | RRID: AB_2715541 / Catalog: #86298S | Western blot (1:2000)                               |
| Antibody            | Rabbit monoclonal anti GAPDH (clone 14C10)                              | Cell Signaling Technology  | RRID: AB_561053 / Catalog: #2118S   | Western blot (1:2000)                               |
| Antibody            | Rabbit monoclonal anti Notch2 (clone D76A6)                             | Cell Signaling Technology  | RRID: AB_10693319 / Catalog: #5732S | Western blot (1:1000)                               |
| Antibody            | Rabbit anti NICD2                                                       | Eli Lilly                  | (Shanmugam et al., 2021)            | Western blot (1:1000) & Immunofluorescence (1:2500) |
| Antibody            | Rabbit monoclonal anti NICD1 (clone D3B8)                               | Cell Signaling Technology  | RRID: AB_2153348 / Catalog: #4147S  | Western blot (1:1000)                               |
| Antibody            | Mouse monoclonal anti HA-tag (clone 6E2)                                | Cell Signaling Technology  | RRID: AB_10691311 / Catalog: #2367S | Western blot (1:500)                                |
| Antibody            | Rabbit monoclonal anti RBPJ (clone D10A4)                               | Cell Signaling Technology  | RRID: AB_2665555 / Catalog: #5313S  | Western blot (1:1000)                               |
| Antibody            | Mouse monoclonal anti mNEONgreen (clone 6G6)                            | Chromotek                  | RRID: AB_2827566 / Catalog: #32F6   | Western blot (1:500)                                |
| Antibody            | Alexa Fluor Plus 647-conjugated donkey anti-rabbit polyclonal secondary | ThermoFisher Scientific    | RRID: AB_2762835 / Catalog: #A32795 | Immunofluorescence (1:1000)                         |

|           |                                      |                                     |                                      |                           |
|-----------|--------------------------------------|-------------------------------------|--------------------------------------|---------------------------|
| Cell line | SVG-A                                | Walter J. Atwood, Brown University  | RRID: CVCL_5G13                      |                           |
| Cell line | Notch2 knockout SVG-A cell line      | This study                          |                                      |                           |
| Cell line | Notch2-APEX2 knockin SVG-A cell line | This study                          |                                      |                           |
| Cell line | 293T                                 | ATCC                                | RRID: CVCL_0063 / Catalog: #CRL-3216 |                           |
| Cell line | U2OS                                 | ATCC                                | RRID: CVCL_0042 / Catalog: #HTB-96   |                           |
| Cell line | HeLa                                 | ATCC                                | RRID: CVCL_0030 / Catalog: #CCL-2    |                           |
| Cell line | U251                                 | Sigma                               | RRID: CVCL_0021 / Catalog: #1610381  |                           |
| Reagent   | Biotin-Phenol                        | Iris Biotech                        | Catalog: #LS-3500                    |                           |
| Reagent   | Hydrogen Peroxide                    | Sigma                               | Catalog: #H1009-5ML                  |                           |
| Reagent   | Pierce Streptavidin magnetic beads   | ThermoFisher Scientific             | Catalog: #88817                      |                           |
| Reagent   | Streptactin-HRP                      | Bio-rad                             | Catalog: #1610381                    | Western blot (1:1000)     |
| Reagent   | JaneliaFluorX549 HaloTag ligand      | Luke Lavis, Janelia Research Campus |                                      | HaloTag labeling (100 nM) |

339

### 340 Cell line generation, cultivation, and manipulation

341 All cell lines were maintained in DMEM with L-glutamine (Corning) supplemented with 10%  
342 fetal bovine serum (FBS, Gemini Bio-Sciences) and 1% penicillin-streptomycin (Gibco) at 37°C  
343 and 5% CO<sub>2</sub>. Cell lines were tested for mycoplasma on a regular basis. CRISPR/Cas9 gene editing  
344 was used to knock out Notch2 in SVG-A cells. For the SVG-A Notch2 knockout cell line, a pX459  
345 plasmid containing a gene-specific guide RNA (gRNA) was transfected using Lipofectamine 2000  
346 (ThermoFisher Scientific) according to the manufacturer's instructions (see [Table S3](#) for gRNA  
347 sequences used in this study). 48 h after transfection, cells were selected using 2 µg/mL puromycin  
348 for 3 days, and single cells were then isolated by flow cytometry using a BD FACSAria cell sorter.

349 Knockout clones were identified by DNA sequencing after PCR amplification of genomic DNA  
350 at the mutated locus, and the loss of protein expression was confirmed by Western blotting.

351

352 CRISPR/Cas9 genome editing was also used to fuse an APEX2-HA tag at the C-terminus of  
353 endogenous Notch2 in SVG-A cells. SVG-A cells were co-transfected with a pX459 plasmid  
354 containing gRNA targeting Notch2 (see [Table S3](#) for gRNA sequences) and a pUC19 donor  
355 plasmid containing a GGAG linker-APEX2-HA-T2A-mNEONGreen cassette flanked by Notch2  
356 genomic locus homology arms each approximately one kilobase in length. Seven days after  
357 transfection, single cells expressing mNEONGreen were isolated by FACS using a Sony SH800S  
358 cell sorter, and individual clones were expanded in 96 well plates. Confirmation of successful  
359 tagging and identification of homozygous clones was carried out by PCR amplifying the region of  
360 the insertion with flanking primers outside of the genomic region covered by the homology arms,  
361 followed by Sanger DNA sequencing for the positive homozygous clones. Clones were further  
362 evaluated to assess the amount of expressed Notch2 protein by Western blotting, the amount of  
363 surface staining by flow cytometry on a BD Accuri C6 Plus flow cytometer, Notch2 transcriptional  
364 activity using a luciferase reporter assay (described below), and APEX2-dependent protein  
365 biotinylation by Western blotting using Streptactin-HRP (Bio-Rad). A similar strategy and gRNA  
366 were used to insert a HaloTag at the C-terminus of endogenous Notch2.

367

### 368 **Western blotting**

369 Adherent cells were washed in ice-cold Dulbecco's Phosphate Buffered Saline (DPBS) and lysed  
370 in gel-loading buffer (2% SDS, 60 mM Tris-HCl pH 6.8, 100 mM DTT, 10% glycerol, and 0.005%  
371 bromophenol blue), scraped off the plate, boiled at 95°C for 5 minutes, and subjected to SDS-  
372 PAGE. Proteins were then transferred to a PROTRAN 0.2 µm nitrocellulose membrane (Cytiva)  
373 and stained with Ponceau S (Sigma-Aldrich). Membranes were incubated in 5% (w/v) non-fat dry  
374 milk in TBST (20 mM Tris, 150 mM NaCl, 0.2% Tween-20, pH 7.6) at room temperature for at  
375 least 1 h. Blocked membranes were incubated with various primary antibodies, or with a  
376 Streptactin-HRP (BioRad), diluted in TBST supplemented with 5% non-fat dry milk overnight at  
377 4°C with gentle shaking. Membranes were washed 3 times with TBST at room temperature and  
378 incubated with appropriate secondary antibodies for 1 h at room temperature with gentle shaking.  
379 Blots were washed 3 times with TBST and imaged using an Odyssey Infrared Imaging System

380 (LI-COR Biosciences) for IRDye-conjugated secondary antibodies or on a Chemidoc (Bio-Rad)  
381 using an Amersham ECL Western Blotting Detection kit (GE Healthcare) for Streptactin-HRP.

382

### 383 **Recombinant Jag1-Fc expression and purification**

384 The extracellular domain (ECD) of human Jag1 (aa 1-1067) was fused to the Fc region (CH2 and  
385 CH3 domains) and hinge region of the human IgG1 heavy chain in the pFUSE-Fc1 vector  
386 (InvivoGen). Jag1ECD-Fc protein was expressed in Expi293F cells grown in Expi293F expression  
387 medium at 37°C in an 8% CO<sub>2</sub> incubator with constant shaking. Cells were grown to a density of  
388 3x10<sup>6</sup> cells/mL in a final volume of 1 L and transiently transfected using FectoPro transfection  
389 reagent (Poly-plus) with 1 mg of purified plasmid at a 2:1 DNA/FectoPro ratio. 22 h after  
390 transfection, 5 mM Valproic acid sodium salt (Sigma-Aldrich) and 10 mL of 45% D-(+)-Glucose  
391 solution (Sigma-Aldrich) were added. After 7 days of culture, the media supernatant was collected  
392 after removal of debris by centrifugation at 4,000 xg for 15 min at 4°C followed by a filtration  
393 step. Filtered media was then loaded onto a Protein A (Millipore) column prewashed in ice cold  
394 HEPES-buffered saline (HBS) buffer (20 mM HEPES pH 7.3, 150 mM NaCl). Bound protein was  
395 eluted in 100 mM glycine, pH 3.0 and neutralized with 1 M Tris buffer pH 7.3. Eluted protein was  
396 buffer exchanged and concentrated in HBS. Protein purity was assessed by separation on SDS-  
397 PAGE after staining with SafeBlue (ThermoFisher Scientific). The purified protein was diluted to  
398 a final concentration of 200 µg/mL in HBS supplemented with 10% glycerol, aliquoted, flash  
399 frozen, and stored at -80°C.

400

### 401 **Activation of Notch2 by immobilized Jag1-Fc**

402 Recombinant Jag1-Fc was immobilized by overnight incubation at 4°C in individual wells of non-  
403 tissue culture-treated 6 or 12 well plates (VWR) at a final concentration of 2 µg/mL in DPBS  
404 containing 10 µg/mL poly-D-lysine (ThermoFisher Scientific). For imaging studies, the ligand  
405 was immobilized in 24 well plates containing pre-washed glass coverslips overnight. The next day,  
406 the Jag1-Fc and poly-D-lysine mixture was removed and the cells were added to the coverslips  
407 and incubated as indicated.

408

### 409 **Drug treatments and washouts**



410 For GSI or GI254023X washout experiments, cells were recovered by centrifugation, resuspended  
411 and washed three times with the appropriate culture media, and then incubated in fresh media at  
412 37°C for the indicated time. For experiments using hydroxy-dynasore, bafilomycinA1, or  
413 chloroquine, cells were incubated in the presence of GSI (Compound E, EMD Millipore) or  
414 GI254023X (Sigma-Aldrich) overnight, and were pre-incubated with the indicated inhibitor 1 h  
415 before removing the GSI or GI254023X. Cells were then incubated in the continued presence of  
416 hydroxy-dynasore (Sigma-Aldrich), bafilomycinA1 (Selleck Chemicals), or chloroquine (Sigma-  
417 Aldrich), at 37°C for the indicated time. Hydroxy-dynasore incubation was performed in serum-  
418 free DMEM.

419

#### 420 **Luciferase reporter assays**

421 SVG-A cells were transfected with a mixture of TP1-firefly luciferase and pRL-TK (Promega)  
422 plasmids at a 49:1 ratio using Lipofectamine 2000 (ThermoFisher Scientific) according to the  
423 manufacturer's instructions. Culture media was replaced 4 h after transfection and the cells were  
424 incubated overnight. The next day, cells were detached with 0.5 mM EDTA, recovered by  
425 centrifugation, and added to plates pre-coated with recombinant Jag1-Fc in media containing 100  
426 nM Compound E (GSI) or 5  $\mu$ M GI254023X. At that time, luciferase assays were performed using  
427 a Dual-Luciferase reporter assay system (Promega) according to the manufacturer's instructions.  
428 For experiments investigating the effects of endocytosis or vesicular acidification, cells were  
429 preincubated with hydroxy-dynasore, bafilomycinA1, or chloroquine for 1 h before removal of  
430 GI254023X, and cells were harvested 6 hours later. Luminescence was measured on a GloMax  
431 plate reader (Promega). Three technical measurements were performed for each of three biological  
432 replicates. The ratio of firefly to Renilla luminescence was calculated and normalized to the control  
433 condition (presence of GI254023X and DMSO) and assigned a value of 100 percent.

434

#### 435 **APEX2 proximity labeling**

436 SVG-A Notch2-APEX2-HA cells were incubated in media supplemented with 2 mM biotin phenol  
437 (BP, Iris Biotech GmbH, LS-3500) for 1 h before adding hydrogen peroxide (H<sub>2</sub>O<sub>2</sub>, Sigma-Aldrich)  
438 to a final concentration of 0.1 mM. 30% (v/v) H<sub>2</sub>O<sub>2</sub> stock solution was freshly diluted to 1 M in  
439 DPBS immediately before each experiment. Washouts of GSI were performed so that each sample  
440 was incubated for exactly 1 h with BP prior to H<sub>2</sub>O<sub>2</sub> exposure. Immediately after adding H<sub>2</sub>O<sub>2</sub>, the

441 culture dishes were gently rocked several times to ensure optimal H<sub>2</sub>O<sub>2</sub> distribution. Exactly 1 min  
442 after the addition of H<sub>2</sub>O<sub>2</sub>, the media was quickly aspirated and cells were washed three times with  
443 quenching buffer (DPBS supplemented with 10 mM sodium ascorbate, 5 mM Trolox [Sigma-  
444 Aldrich], and 10 mM sodium azide). Cells were then scraped in quenching buffer, harvested by  
445 centrifugation, and cell pellets were flash-frozen and stored at -80°C until streptavidin pull-down  
446 was performed.

447

#### 448 **Streptavidin pull-down**

449 All solutions and buffers were freshly prepared and filtered. Streptavidin capture of biotinylated  
450 proteins was performed as previously described (Kalocsay, 2019; May et al., 2021). Briefly, frozen  
451 cell pellets were lysed in ice cold lysis buffer (8 M Urea, 100 mM sodium phosphate pH 8.0, 1%  
452 SDS (w/v), 100 mM NH<sub>4</sub>HCO<sub>3</sub>, 10 mM TCEP) and pipetted repeatedly on ice to ensure proper  
453 cell lysis. Lysates were then homogenized by passing them through QIAshredder cartridges  
454 (Qiagen). Proteins were precipitated by adding an equal volume of ice cold 55% Trichloroacetic  
455 acid (TCA, Sigma-Aldrich), incubated 15 min on ice, and then pelleted by centrifugation at 21,000  
456 x g at 4°C for 10 min. The protein pellet was washed with -20°C cold acetone (Sigma-Aldrich),  
457 vortexed, and centrifuged at 21,000 x g at 4°C for 10 min. Following centrifugation, acetone was  
458 removed and the pellet was washed with acetone 3 more times. After the last wash, the pellet was  
459 resuspended in lysis buffer as described above, vortexed, and rotated at room temperature until  
460 fully dissolved, allowing reduction of proteins by TCEP at the same time.

461 Resuspended proteins were centrifuged at 21,000 x g at room temperature for 10 min and  
462 the clear supernatant was transferred to a new microcentrifuge tube. To alkylate free cysteines,  
463 freshly prepared 400 mM iodoacetamide stock solution (Sigma-Aldrich) in 50 mM ammonium  
464 bicarbonate was added to the supernatant at a final concentration of 20 mM, and the samples were  
465 immediately vortexed and then incubated in the dark at room temperature for 25 min. After  
466 alkylation, freshly prepared dithiothreitol (DTT, Sigma-Aldrich) was added to a final  
467 concentration of 50 mM to quench the reaction. Finally, water was added to each sample to reach  
468 a final concentration of 4 M urea and 0.5% (w/v) of SDS.

469 125 µL of streptavidin magnetic bead suspension (ThermoFisher Scientific) was washed  
470 twice with 4 M urea, 0.5% SDS (w/v), 100 mM sodium phosphate pH 8.0 and added to each  
471 sample. The tubes were gently rotated overnight at 4°C. Following capture of biotinylated proteins,

472 the magnetic beads were washed 3 times with 4 M urea, 0.5% SDS (w/v), 100 mM sodium  
473 phosphate pH 8.0, 3 more times with the same buffer without SDS, and finally 3 more times with  
474 DPBS. The beads were transferred to new tubes for each change of wash buffer.

475

#### 476 **On-beads digestion and tandem mass tag (TMT) labeling**

477 The streptavidin beads were subjected to on-bead protease digestion in 50  $\mu$ l digestion buffer (200  
478 mM EPPS pH 8.5 with 2% acetonitrile [v/v]) along with LysC (Wako) at an enzyme-to-substrate  
479 ratio of 1:50. The samples were incubated at 37°C for 3 h. Then 50  $\mu$ l of digestion buffer with  
480 trypsin (Promega) was added at an enzyme-to-substrate ratio of 1:100. The digestion was  
481 continued at 37°C overnight with gentle agitation. The clear supernatants of digested protein were  
482 separated from beads with a magnetic rack and transferred to fresh tubes.

483 For the TMT reaction, 30% acetonitrile (v/v) was added to the digested protein and then  
484 labeled using a TMT isobaric mass tagging kit (ThermoFisher Scientific). The TMT reaction was  
485 performed for 1 h according to the manufacturer's instructions. TMT labeling efficiency and ratios  
486 were measured by LC-MS3 analysis after combining equal volumes from each sample. Once the  
487 labeling efficiency was determined to be >95%, the TMT reactions were quenched with  
488 hydroxylamine 0.5% v/v for 15 min and acidified with formic acid. Samples were then pooled and  
489 dried to near completion under reduced pressure before resuspension in 1% formic acid and  
490 fractionation using a Pierce High pH Reversed Phase Peptide Fractionation Kit (ThermoFisher  
491 Scientific) with modified elution of 12 sequential fractions (10%, 12.5%, 15%, 17.5%, 20%, 25%,  
492 30%, 35%, 40%, 50%, 65% and 80% acetonitrile). Fractions were then combined into pairs as  
493 follows, 1+7, 2+8, 3+9, 4+10, 5+11, 6+12, to give the final six fractionated samples. The resulting  
494 fractions were dried under reduced pressure and then desalted using a stage tip protocol  
495 (Rappsilber et al., 2007).

496

#### 497 **Mass spectrometry acquisition and data analysis**

498 Data were acquired on an Orbitrap Fusion Lumos instrument (ThermoFisher Scientific)  
499 coupled to a Proxeon Easy-nLC 1200 UHPLC. Peptides were injected onto a 100  $\mu$ m (inner  
500 diameter) capillary column (~30 cm) packed in-house with C18 resin (2.6  $\mu$ m, 150Å,  
501 ThermoFisher Scientific). Peptide fractions were separated with a 4 h acidic acetonitrile gradient  
502 from 5-35% Buffer B (Buffer A = 0.125% formic acid, Buffer B = 95% acetonitrile, 0.125% formic

503 acid). All data were collected with a multi notch MS3 method (McAlister et al., 2014). MS1 scans  
504 (Orbitrap analysis; resolution 120,000; mass range 400–1400 Th) were followed by MS2 analysis  
505 with collision-induced dissociation (CID, CE=35) and a maximum ion injection time of up to 120  
506 ms and an isolation window of 0.4 m/z, using rapid scan mode. To obtain quantitative information,  
507 MS3 precursors were fragmented by high-energy collision-induced dissociation (HCD, CE=65)  
508 and analyzed in the Orbitrap at a resolution of 50,000 at 200 Th with max injection time set to 650  
509 ms. Raw spectra were converted to mzXML to correct monoisotopic m/z measurements and to  
510 perform a post-search calibration.

511 Spectra were searched using SEQUEST (v.28, rev.12) software against the UniProt human  
512 reference proteome (downloaded 02-25-2020), containing common contaminants and reversed  
513 order protein sequences as decoy hits (Eng et al., 1994). Searches were performed with a precursor  
514 mass tolerance of 20 ppm, and the fragment-ion tolerance was set to 0.9 Da. For searches a  
515 maximum of 2 missed trypsin cleavage sites were allowed. Oxidized methionines (+15.9949 Da)  
516 were set as a variable modification, while cysteine carboxyamidomethylation (+57.0215) and  
517 TMT (+229.1629 or TMT16 (+304.2071 Da) tags on lysine and peptide N-termini were set as a  
518 static modification. Peptide spectral matches (PSM) were filtered by linear discriminant analysis  
519 (LDA), using a target-decoy database search to adjust the PSM false discovery rate to 1% and  
520 protein level FDR of 1% (Huttlin et al., 2010). For MS3 relative quantification, peptides were  
521 filtered for an MS2 isolation specificity of >70%, and a total TMT summed signal to noise of >200  
522 for all channels in the multiplex. Further details of the TMT quantification method and search  
523 parameters applied were described previously (Paulo et al., 2016).

524 Proteomics raw data and search results were deposited in the PRIDE archive for each  
525 multiplex experiment with accession number: PXD039008 (immobilized ligand with GSI  
526 experiment, [Table S1](#)) and PXD039010 (immobilized ligand with GSI nuclear centered  
527 experiment, [Table S2](#)).

528

### 529 **Immunofluorescence and image processing**

530 SVG-A Notch2-HaloTag cells were grown on ligand-coated coverslips. Cells were labeled  
531 with JaneliaFluorX549 HaloTag ligand (a gift from Luke Lavis, Janelia Research Campus) at a  
532 final concentration of 100 nM in media for 15 min at 37°C. The media was then removed, cells  
533 washed with fresh media, and returned to the incubator for 1 h to allow newly synthesized labeled

534 Notch2 to be delivered to the plasma membrane. Cells were treated with the indicated  
535 vesicular/transport inhibitors prior to GI254023X/GSI washout, as described above.

536 2 h after washout of GI254023X or GSI, cells were washed 3 times in DPBS, fixed with  
537 4% paraformaldehyde (PFA, Sigma-Aldrich) for 15 min at room temperature (RT), washed three  
538 times in DPBS, and quenched with 0.1 M Glycine pH 7.5 in DPBS for 15 min at RT. After another  
539 three PBS washes, fixed cells were permeabilized with 0.1% Triton X-100 in DPBS for 10 min at  
540 room temperature followed by three washes in DPBS and blocking in 5% BSA (w/v) in DPBS for  
541 1 hour at room temperature. Cells were then incubated for 1 h with primary antibodies diluted in  
542 blocking buffer at room temperature. After three washes in DPBS, the cells were incubated with  
543 secondary antibody (Alexa Fluor Plus 647-conjugated anti-rabbit, ThermoFisher Scientific  
544 A32795) diluted in blocking buffer for 45 min at room temperature followed by three washes in  
545 DPBS. For DNA staining, cells were incubated with SYTOX Green Nucleic Acid Stain  
546 (ThermoFisher Scientific) according to manufacturer's recommendations followed by three  
547 washes in DPBS. Coverslips were then mounted with ProLong Gold Antifade Mountant with  
548 DAPI (ThermoFisher Scientific) or without DAPI if already labeled with SYTOX Green.  
549 Coverslips were stored at 4°C before image acquisition.

550 Images were acquired using a Marianas system (Intelligent Imaging Innovation) composed  
551 of a Zeiss Axio-Observer Z1 (Carl Zeiss) equipped with a 63x objective (Plan-Apochromat, NA  
552 1.4, Carl Zeiss), a spinning disk confocal head (CSU-XI, Yokogawa Electric Corporation) and a  
553 spherical aberration correction system (Infinity Photo-Optical). Excitation light was provided by  
554 405, 488, 561, or 640 nm solid-state lasers (Sapphire, 50 mW, Coherent Inc) coupled to an  
555 acoustic-optical tunable filter. Laser power and exposure times were kept the same for all  
556 experiments. Z stacks of 38 x-y confocal images were obtained in 270 nm z-steps using a cooled  
557 CCD camera (QuantEM, 512SC, Photometrics). All equipment was controlled by SlideBook  
558 acquisition software (Intelligent Imaging Innovations).

559 Image processing was performed using Fiji software (Schindelin et al., 2012). For nuclear  
560 intensity measurements, the nucleus was identified by DAPI or SYTOX Green staining and the  
561 mean fluorescence of each indicated channel was measured by applying a nucleus mask. After  
562 removing the raw nuclear background for each channel, the mean fluorescence intensity was  
563 normalized to a control condition assigned a value of 100 percent.

564

565 **Statistical analysis**

566 Statistical analyses of fluorescence microscopy, luciferase reporter assays, qPCR, and Western  
567 blotting experiments were performed using GraphPad Prism software (GraphPad). One-way  
568 ANOVA testing was performed for the comparison of multiple groups. All error bars denote mean  
569  $\pm$  standard deviation. \* $p < 0.05$ , \*\* $p < 0.01$ , \*\*\* $p < 0.001$ . The number of individual experiments  
570 analyzed is indicated in the figure legends.

571

572 **ACKNOWLEDGMENTS**

573 We thank members of the Blacklow lab for helpful discussions. This work was supported by NIH  
574 awards 1R35 CA220340 and R01 CA272484 (to S.C.B. and T.K.), 5R35 GM130386 (to T.K.),  
575 and K99 GM144750 (to J.M.R.). A.P.M was supported by a Merck Postdoctoral Fellowship.  
576 J.C.A. is supported by the Ludwig Center at Harvard.

577

578 **AUTHOR CONTRIBUTIONS**

579 A.P.M. and S.C.B. conceived the project. S.C.B. and T.K. acquired funding. A.P.M. performed  
580 and analyzed experiments. E.D.E. performed initial characterization of the parental SVG-A cell  
581 line and designed and generated Notch2-HaloTag knockin and Notch2 knockout lines. G.A.B.,  
582 R.J.E., and M.K., processed and analyzed mass spectrometry data. L.T., G.S., and T.K., assisted  
583 with and gave technical advice for microscopy experiments. J.M.R., J.C.A., A.N.D., and M.K.  
584 assisted with data analysis and interpretation. A.P.M. and S.C.B. wrote the manuscript with input  
585 from all authors. All authors provided feedback and agreed on the final manuscript.

586

587 **DECLARATION OF INTERESTS**

588 S.C.B. is on the board of directors of the non-profit Institute for Protein Innovation and the Revson  
589 Foundation, is on the scientific advisory board for and receives funding from Erasca, Inc. for an  
590 unrelated project, is an advisor to MPM Capital, and is a consultant for IFM, Scorpion  
591 Therapeutics, Odyssey Therapeutics, Droia Ventures, and Ayala Pharmaceuticals for unrelated  
592 projects. J.C.A. is a consultant for Ayala Pharmaceuticals, Cellestia, Inc., SpringWorks  
593 Therapeutics, and Remix Therapeutics.

594 **FIGURE LEGENDS**

595 **Figure 1: Design, experimental procedure, and overall kinetic profiles of time-resolved**  
596 **Notch2-APEX2 proximity labeling in SVG-A cells.** (A) Schematic of key steps in Notch2  
597 signaling induced by immobilized Jag1 ligand. Jag1 stimulates Notch2 proteolysis at S2 by  
598 ADAM10, followed by gamma secretase cleavage at S3. The S3-cleaved Notch2 intracellular  
599 domain (NICD2) transits to the nucleus and associates with RBPJ and the transcriptional co-  
600 activator MAML1 to induce the expression of target genes. BB94 and GI254023X (also referred  
601 as GI25X) are inhibitors of ADAM10, and Compound E (referred to as GSI) is a potent inhibitor  
602 of gamma secretase. (B) Schematic showing the design for time-resolved proximity labeling by  
603 Notch2-APEX2 using plated Jag1 as ligand and washout of GSI at time  $t=0$ . (C) Heatmap of  
604 hierarchical clustering of Notch2-APEX2 proximity labeling as a function of time after washout.  
605 Clustering of the relative abundance of each identified protein (columns) as a function of time  
606 (rows) was performed using Ward's minimum variance method. Color palette representing the  
607 relative abundance for each protein (minimum to maximum) is shown on the right. (D-F) Kinetic  
608 profiles of representative proteins showing an early (D), late (E), or sustained (F) labeling pattern.  
609

610 **Figure 2: Changes in the Notch2 microenvironment upon stimulation by ligand in the**  
611 **presence of GSI.** (A) Heatmap of hierarchical clustering of proteins characterized by peak relative  
612 abundance in conditions without Notch stimulation by ligand. (B) Gene Ontology terms for  
613 proteins significantly enriched in panel A. (C) Volcano plot comparing relative abundance of  
614 proteins enriched upon Jag1 stimulation in GSI compared to no ligand stimulation. Significantly  
615 enriched proteins ( $p$ -value  $\leq 0.05$ , FC  $\geq 1.5$ ) related to endocytosis and/or vesicular-mediated  
616 transport are labeled in orange, whereas significantly downregulated proteins that localize to the

617 plasma membrane are labeled in green. P-values are Benjamini-Hochberg corrected. (D) Heatmap  
618 focused on proteins related to endocytosis and vesicular transport identified in the time-resolved  
619 Notch2-APEX2 proximity labeling analysis. (E) Gene Ontology terms for proteins significantly  
620 enriched in panels C and D.

621

622 **Figure 3: Effects of acidification and endocytosis inhibitors on Notch2 activity after removal**  
623 **of ADAM10 or gamma secretase inhibitors.** (A) Representative images of Jag1-stimulated  
624 SVG-A Notch2-HaloTag cells showing the cellular distribution of Notch2-HaloTag (Notch2-  
625 Halo) and (S3-cleaved) NICD2 after removal of the ADAM10 inhibitor GI254023X in the absence  
626 or presence of hydroxy-dynasore (20  $\mu$ M), bafilomycinA1 (BafA1; 25 nM), or chloroquine (50  
627  $\mu$ M). The HaloTag was labeled with JaneliaFluorX549 HaloTag ligand and NICD2 was stained  
628 with an anti-NICD2 primary antibody and anti-rabbit secondary antibody conjugated to Alexa  
629 Fluor 647. Nuclei were identified by DAPI staining. Scale bars: 20  $\mu$ m. (B-C) Quantification of  
630 signal intensity in the nucleus for Notch2-Halo (B) and for NICD2 (C) for the imaging data  
631 presented in panel A. (D) Quantification of Western blot data for NICD2 abundance after  
632 GI254023X washout in the presence of hydroxy-dynasore (20  $\mu$ M), bafilomycinA1 (BafA1; 25  
633 nM), or chloroquine (50  $\mu$ M). (E) Representative Western blot for NICD2 quantified in panel D  
634 (see Supplemental Figure 5 for NICD1 and NICD2 generation in other cell lines). (F) Notch  
635 luciferase reporter assay. Parental SVG-A cells were stimulated by immobilized Jag1 overnight in  
636 the presence of GI254023X, and the relative luciferase activity was measured 6 h after removal of  
637 the ADAM10 inhibitor GI254023X in the absence or presence of hydroxy-dynasore (20  $\mu$ M),  
638 bafilomycinA1 (BafA1; 25 nM), or chloroquine (50  $\mu$ M). (G-H) Quantification of signal intensity  
639 in the nucleus (see Supplemental Figure 4B for imaging data) for Notch2-Halo (G) and activated



640 NICD2 (H) after removal of the GSI compound E (100 nM) in the absence or presence of hydroxy-  
641 dynasore (20  $\mu$ M), bafilomycinA1 (BafA1; 25 nM), or chloroquine (50  $\mu$ M). All data presented in  
642 this figure are from three biological replicates.

643

644 **Figure 4: NICD2 microenvironment early after GSI washout.** (A) Hierarchical clustering of  
645 the proteins characterized by a peak of relative abundance between 2 - 5 min after GSI removal,  
646 focusing on neighbors closest to Ezrin (EZR). (B,C) Volcano plots comparing Notch2 proximity-  
647 labeled proteins enriched at the 5 (B) and 15 (C) min timepoints after GSI removal when compared  
648 to GSI (t=0). Proteins related to actin, myosin, or cytoskeletal transport are labeled in blue, and  
649 proteins related to endocytosis or vesicular-mediated transport are labeled in orange. P-values are  
650 Benjamini-Hochberg corrected ( $p\text{-value} \leq 0.05$ ,  $FC \geq 1.5$ ). (D) Heatmap showing the enrichment  
651 pattern of proteins related to nuclear import identified by Notch2 proximity labeling.

652

653 **Figure 5: Nuclear accumulation of NICD2 and engagement with transcriptional regulators**

654 (A) Volcano plot highlighting Notch2 proximity-labeled proteins enriched 2 h after GSI removal  
655 when compared to GSI (t=0). Significantly enriched proteins ( $p\text{-value} \leq 0.05$ ,  $FC \geq 1.5$ ) implicated  
656 in transcriptional activity are red, and other nuclear proteins are indicated in yellow. P-values are  
657 Benjamini-Hochberg corrected. (B) Heatmap showing kinetic profiles of proteins that cluster  
658 adjacent to MAML1 with strong enrichment 2 h after GSI washout. (C) Schematic showing the  
659 design for focused proximity labeling around the time of NICD2 nuclear entry using plated Jag1  
660 as ligand and washout of GSI at time t=0 (see Supplemental Figure 6). (D) Heatmap of hierarchical  
661 clustering centered on proteins with kinetic profiles most closely related to MAML1 in the nuclear-  
662 centered proximity labeling dataset (see Supplemental Figure 6). (E) Volcano plot of Notch2

663 proximity-labeled proteins enriched 45 min after GSI removal when compared to GSI (t=0) in the  
664 nuclear-centered dataset. Significantly enriched proteins ( $p$ -value  $\leq 0.05$ , FC  $\geq 1.5$ ) implicated in  
665 transcriptional activity are red. P-values are Benjamini-Hochberg corrected. (F) Line plots  
666 showing the kinetic profiles of MAML1, the SWI/SNF chromatin-remodeling complex component  
667 ARID1A, CREBBP/p300, and the nuclear factor 1 C-type (NFIC) and (G) line plots showing the  
668 kinetic profiles of the transcriptional regulators EWSR1, RAI1, KHSRP, and TAF15 in the  
669 nuclear-centered dataset.

670

671 **Figure 6: Model including Notch2 internalization as a mechanistic step in Notch activation**  
672 **and signaling.** Upon ligand stimulation of SVG-A cells, Notch2 is cleaved at site S2 by ADAM10,  
673 followed by entry of S2 processed Notch2 molecules into an intracellular compartment.  
674 Internalized Notch2 molecules are then cleaved at site S3 by gamma secretase, generating NICD2,  
675 which access the nucleus about 30-45 min after GSI washout and induces its transcriptional  
676 response.

677

678 **Supplemental Figure 1: SVG-A Notch2-APEX2 cell line validation, related to Figure 1.** (A)  
679 Western blot probing for Notch2 in lysates from parental and Notch2 knockout SVG-A cells. (B)  
680 Notch luciferase reporter assay, measuring relative luciferase activity in parental or Notch2  
681 knockout SVG-A cells cultured with or without immobilized Jag1. (C) Design strategy for  
682 CRISPR/Cas9-mediated Notch2-APEX2 knock-in in SVG-A cells. An APEX2-HA-T2A-  
683 mNEONgreen cassette was inserted at the C-terminus of the genomic locus of the *NOTCH2* gene.  
684 The addition of the T2A-mNEONgreen enabled fluorescence-activated cell sorting (FACS) of  
685 clones with genomic integration of the repair template. (D) Western blot probing for Notch2 in

686 lysates from parental and Notch2-APEX2 knock-in cells. (E) Notch luciferase reporter assay,  
687 measuring relative luciferase activity in parental or Notch2 knockout SVG-A cells cultured with  
688 or without immobilized Jag1 in the presence of DMSO carrier, 100 nM GSI, or 10  $\mu$ M BB94.  
689 (F) Streptactin blot of parental and Notch2-APEX2 SVG-A cells probing biotinylation as a  
690 function of added biotin-phenol, H<sub>2</sub>O<sub>2</sub>, or both molecules.

691

692 **Supplemental Figure 2: Notch2-APEX2 activation kinetics and biotinylation patterns,**  
693 **related to Figure 1.** (A) Western blot of Jag1-stimulated SVG-A cell lysates, probing for activated  
694 NICD2 as a function of time after removal of GSI (100 nM). (B) Streptactin blot of Jag1-stimulated  
695 SVG-A cell lysates, probing for proteins biotinylated by Notch2-APEX2 as a function of time after  
696 removal of GSI (WO).

697

698 **Supplemental Figure 3: Notch2-APEX2 proximity labeling workflow and time-course**  
699 **reproducibility, related to Figure 1.** (A) Sample preparation and mass spectrometry workflow  
700 for analysis of the Notch2-APEX2 proximity labeling time course. After collection, samples were  
701 lysed and biotin-labeled proteins were purified by streptavidin pull-down in denaturing conditions.  
702 Recovered proteins were digested with trypsin, and then labeled using tandem mass tags (TMT,  
703 16 plex) to enable quantitative mass spectrometric analysis of 16 different samples at the same  
704 time. (B) Pearson correlation matrix showing good reproducibility between internal replicates. (C)  
705 Principal Component Analysis (PCA) of the Notch2-APEX2 proximity labeling time-course. Each  
706 dot represents a sample and each color a time point. (D) Western blots of Jag1-stimulated Notch2-  
707 APEX2 knock-in SVG-A cells, probing for RBPJ as a function of time after GSI washout. Top:  
708 input; bottom: streptavidin pull-down.

709

710 **Supplemental Figure 4: Effect of inhibition of endocytosis or vesicular acidification on**

711 **NICD2 nuclear accumulation after GI254023X or GSI washout, related to Figure 3. (A)**

712 Representative images of SVG-A Notch2-HaloTag cells showing the subcellular localization of

713 Notch2-HaloTag (Notch2-Halo) and (S3-cleaved) NICD2 in the presence of DMSO, 5  $\mu$ M

714 GI254023X, 100 nM GSI, 20  $\mu$ M hydroxy-dynasore, 25 nM bafilomycinA1 (BafA1), or 50  $\mu$ M

715 chloroquine in the absence of ligand stimulation. The HaloTag was labeled with JaneliaFluorX549

716 HaloTag ligand and NICD2 was stained with an anti-NICD2 primary antibody and anti-rabbit

717 secondary antibody conjugated to Alexa Fluor 647. Nuclei were identified by DAPI staining. Scale

718 bars: 20  $\mu$ m. (B) Representative images of Jag1-stimulated SVG-A-Notch2-HaloTag cells

719 showing the subcellular localization of Notch2-HaloTag (Notch2-Halo) and (S3-cleaved) NICD2

720 before and after removal of GSI (100 nM) in the absence or presence of hydroxy-dynasore (20

721  $\mu$ M), bafilomycinA1 (BafA1; 25 nM), or chloroquine (50  $\mu$ M). Nuclei were identified by DAPI

722 staining. Scale bars: 20  $\mu$ m.

723

724 **Supplemental Figure 5: Effect of inhibition of endocytosis or vesicular acidification on**

725 **NICD1 and NICD2 generation in different cell lines, related to Figure 3. (A-E) Representative**

726 Western blot analysis (left) and quantifications (right) for NICD1 and/or NICD2 in Jag1-

727 stimulated SVG-A (A), 293T (B), U2OS (C), HeLa (D), or U251 (E) cells 2 h after GI25X washout

728 in the presence of different endocytosis and vesicular trafficking inhibitors. All quantifications

729 presented in this figure are from 3 biological replicates.

730

731 **Supplemental Figure 6: Notch2-APEX2 time-resolved proximity labeling focused on nuclear**  
732 **entry, related to Figure 5.** (A) Principal Component Analysis (PCA) of enrichment profiles of  
733 the proteins identified in the Notch2-APEX2 proximity labeling time-course centered around  
734 NICD2 nuclear entry. Each dot represents a sample and each color a time point. (B) Heatmap of  
735 hierarchical clustering of Notch2-APEX2 proximity labeling as a function of time after GSI  
736 washout using plated Jag1 with timepoints centered around NICD2 nuclear entry. Clustering of  
737 the relative abundance of each identified protein (columns) as a function of time (rows) was  
738 performed based on Ward's minimum variance method. The color scheme representing the relative  
739 abundance for each protein (minimum to maximum) is shown on the right.

740

741 **Supplemental Table S1: List of proteins identified and their enrichment levels for Notch2-**  
742 **APEX2 using immobilized ligand with GSI washout.**

743

744 **Supplemental Table S2: List of proteins identified and their enrichment levels for Notch2-**  
745 **APEX2 using immobilized ligand with GSI nuclear centered washout.**

746

747 **Supplemental Table S3: List and sequence of primers used in this study.**

748

749

## 750 REFERENCES

- 751 Aber, R., Chan, W., Mugisha, S., & Jerome-Majewska, L. A. (2019). Transmembrane emp24  
752 domain proteins in development and disease. In *Genetics Research* (Vol. 101). Cambridge  
753 University Press. <https://doi.org/10.1017/S0016672319000090>
- 754 Aster, J. C., Pear, W. S., & Blacklow, S. C. (2016). The Varied Roles of Notch in Cancer. *Annual*  
755 *Review of Pathology: Mechanisms of Disease*, 12(1), 245–275.  
756 <https://doi.org/10.1146/annurev-pathol-052016-100127>
- 757 Aster, J. C., Xu, L., Karnell, F. G., Patriub, V., Pui, J. C., & Pear, W. S. (2000). Essential Roles  
758 for Ankyrin Repeat and Transactivation Domains in Induction of T-Cell Leukemia by  
759 Notch1. *Molecular and Cellular Biology*, 20(20), 7505–7515.  
760 <https://doi.org/10.1128/mcb.20.20.7505-7515.2000>
- 761 Bailis, W., Yashiro-Ohtani, Y., & Pear, W. S. (2014). Identifying direct Notch transcriptional  
762 targets using the GSI-washout assay. *Methods in Molecular Biology (Clifton, N.J.)*, 1187,  
763 247–254. [https://doi.org/10.1007/978-1-4939-1139-4\\_19](https://doi.org/10.1007/978-1-4939-1139-4_19)
- 764 Castel, D., Mourikis, P., Bartels, S. J. J., Brinkman, A. B., Tajbakhsh, S., & Stunnenberg, H. G.  
765 (2013). Dynamic binding of RBPJ is determined by Notch signaling status. *Genes &*  
766 *Development*, 27(9), 1059–1071. <https://doi.org/10.1101/GAD.211912.112>
- 767 Cautain, B., Hill, R., de Pedro, N., & Link, W. (2015). Components and regulation of nuclear  
768 transport processes. In *FEBS Journal* (Vol. 282, Issue 3, pp. 445–462). Blackwell Publishing  
769 Ltd. <https://doi.org/10.1111/febs.13163>
- 770 Chapman, G., Major, J. A., Iyer, K., James, A. C., Pursglove, S. E., Moreau, J. L. M., &  
771 Dunwoodie, S. L. (2016). Notch1 endocytosis is induced by ligand and is required for signal  
772 transduction. *Biochimica et Biophysica Acta - Molecular Cell Research*, 1863(1), 166–177.  
773 <https://doi.org/10.1016/j.bbamcr.2015.10.021>
- 774 Chirivino, D., del Maestro, L., Formstecher, E., Hupé, P., Raposo, G., Louvard, D., & Arpin, M.  
775 (2011). The ERM proteins interact with the HOPS complex to regulate the maturation of  
776 endosomes. *Molecular Biology of the Cell*, 22(3), 375–385. <https://doi.org/10.1091/mbc.E10-09-0796>
- 777
- 778 Chow, V. W., Mattson, M. P., Wong, P. C., & Gleichmann, M. (2010). An overview of APP  
779 processing enzymes and products. In *Neuromolecular medicine* (Vol. 12, Issue 1, pp. 1–12).  
780 NIH Public Access. <https://doi.org/10.1007/s12017-009-8104-z>
- 781 Christy J. Fryer, J. Brandon White, & Katherine A. Jones. (2004). Mastermind Recruits  
782 CycC:CDK8 to Phosphorylate the Notch ICD and Coordinate Activation with Turnover.  
783 *Molecular Cell*, 509–520. <https://doi.org/10.1016/j.molcel.2004.10.014>
- 784 Chyung, J. H., Raper, D. M., & Selkoe, D. J. (2005).  $\gamma$ -Secretase Exists on the Plasma Membrane  
785 as an Intact Complex That Accepts Substrates and Effects Intramembrane Cleavage,. *Journal*  
786 *of Biological Chemistry*, 280(6), 4383–4392. <https://doi.org/10.1074/JBC.M409272200>
- 787 Delaney, C., Varnum-Finney, B., Aoyama, K., Brashem-Stein, C., & Bernstein, I. D. (2005). Dose-  
788 dependent effects of the Notch ligand Delta1 on ex vivo differentiation and in vivo marrow  
789 repopulating ability of cord blood cells. *Blood*, 106(8), 2693.  
790 <https://doi.org/10.1182/BLOOD-2005-03-1131>

- 791 Eng, J. K., McCormack, A. L., & Yates, J. R. (1994). An approach to correlate tandem mass  
792 spectral data of peptides with amino acid sequences in a protein database. *Journal of the*  
793 *American Society for Mass Spectrometry*, 5(11), 976–989. [https://doi.org/10.1016/1044-](https://doi.org/10.1016/1044-0305(94)80016-2)  
794 0305(94)80016-2
- 795 Faló-Sanjuan, J., & Bray, S. J. (2022). Notch-dependent and -independent transcription are  
796 modulated by tissue movements at gastrulation. *ELife*, 11.  
797 <https://doi.org/10.7554/ELIFE.73656>
- 798 Fehon, R. G., McClatchey, A. I., & Bretscher, A. (2010). Organizing the cell cortex: The role of  
799 ERM proteins. In *Nature Reviews Molecular Cell Biology* (Vol. 11, Issue 4, pp. 276–287).  
800 Nat Rev Mol Cell Biol. <https://doi.org/10.1038/nrm2866>
- 801 Fryer, C. J., Lamar, E., Turbachova, I., Kintner, C., & Jones, K. A. (2002). Mastermind mediates  
802 chromatin-specific transcription and turnover of the notch enhancer complex. *Genes and*  
803 *Development*, 16(11), 1397–1411. <https://doi.org/10.1101/gad.991602>
- 804 Gordon, W. R., Zimmerman, B., He, L., Miles, L. J., Huang, J., Tiyanont, K., McArthur, D. G.,  
805 Aster, J. C., Perrimon, N., Loparo, J. J., & Blacklow, S. C. (2015). Mechanical Allosteric:  
806 Evidence for a Force Requirement in the Proteolytic Activation of Notch. *Developmental*  
807 *Cell*, 33(6), 729–736. <https://doi.org/10.1016/j.devcel.2015.05.004>
- 808 Gupta-Rossi, N., Six, E., LeBail, O., Logeat, F., Chastagner, P., Olry, A., Israël, A., & Brou, C.  
809 (2004). Monoubiquitination and endocytosis direct  $\gamma$ -secretase cleavage of activated Notch  
810 receptor. *Journal of Cell Biology*, 166(1), 73–83. <https://doi.org/10.1083/jcb.200310098>
- 811 Hansson, E. M., Strömberg, K., Bergstedt, S., Yu, G., Näslund, J., Lundkvist, J., & Lendahl, U.  
812 (2005). Aph-1 interacts at the cell surface with proteins in the active  $\gamma$ -secretase complex and  
813 membrane-tethered Notch. *Journal of Neurochemistry*, 92(5), 1010–1020.  
814 <https://doi.org/10.1111/J.1471-4159.2004.02926.X>
- 815 Henrique, D., & Schweisguth, F. (2019). Mechanisms of notch signaling: A simple logic deployed  
816 in time and space. *Development (Cambridge)*, 146(3). <https://doi.org/10.1242/dev.172148>
- 817 Hori, K., Sen, A., & Artavanis-Tsakonas, S. (2013). Notch signaling at a glance. *Journal of Cell*  
818 *Science*, 126(10), 2135–2140. <https://doi.org/10.1242/jcs.127308>
- 819 Housden, B. E., Fu, A. Q., Krejci, A., Bernard, F., Fischer, B., Tavaré, S., Russell, S., & Bray, S.  
820 J. (2013). Transcriptional Dynamics Elicited by a Short Pulse of Notch Activation Involves  
821 Feed-Forward Regulation by E(spl)/Hes Genes. *PLOS Genetics*, 9(1), e1003162.  
822 <https://doi.org/10.1371/JOURNAL.PGEN.1003162>
- 823 Hung, V., Udeshi, N. D., Lam, S. S., Loh, K. H., Cox, K. J., Pedram, K., Carr, S. A., & Ting, A.  
824 Y. (2016). Spatially resolved proteomic mapping in living cells with the engineered  
825 peroxidase APEX2. *Nature Protocols*, 11(3), 456–475.  
826 <https://doi.org/10.1038/nprot.2016.018>
- 827 Huttlin, E. L., Jedrychowski, M. P., Elias, J. E., Goswami, T., Rad, R., Beausoleil, S. A., Villén,  
828 J., Haas, W., Sowa, M. E., & Gygi, S. P. (2010). A tissue-specific atlas of mouse protein  
829 phosphorylation and expression. *Cell*, 143(7), 1174–1189.  
830 <https://doi.org/10.1016/j.cell.2010.12.001>
- 831 Ilagan, M. X. G., Lim, S., Fulbright, M., Piwnicka-Worms, D., & Kopan, R. (2011). Real-time  
832 imaging of Notch activation with a luciferase complementation-based reporter. *Science*

- 833           *Signaling*, 4(181).  
834           [https://doi.org/10.1126/SCISIGNAL.2001656/SUPPL\\_FILE/4\\_RS7\\_SM.PDF](https://doi.org/10.1126/SCISIGNAL.2001656/SUPPL_FILE/4_RS7_SM.PDF)
- 835 Kalocsay, M. (2019). APEX Peroxidase-Catalyzed Proximity Labeling and Multiplexed  
836 Quantitative Proteomics. *Methods in Molecular Biology (Clifton, N.J.)*, 2008, 41–55.  
837 [https://doi.org/10.1007/978-1-4939-9537-0\\_4](https://doi.org/10.1007/978-1-4939-9537-0_4)
- 838 Kamath, B. M., Bauer, R. C., Loomes, K. M., Chao, G., Gerfen, J., Hutchinson, A., Hardikar, W.,  
839 Hirschfield, G., Jara, P., Krantz, I. D., Lapunzina, P., Leonard, L., Ling, S., Ng, V. L., le  
840 Hoang, P., Piccoli, D. A., & Spinner, N. B. (2012). NOTCH2 mutations in Alagille syndrome.  
841 *Journal of Medical Genetics*, 49(2), 138–144. [https://doi.org/10.1136/jmedgenet-2011-](https://doi.org/10.1136/jmedgenet-2011-100544)  
842 100544
- 843 Kirchhausen, T., Macia, E., & Pelish, H. E. (2008). Use of Dynasore, the Small Molecule Inhibitor  
844 of Dynamin, in the Regulation of Endocytosis. In *Methods in Enzymology* (Vol. 438, pp. 77–  
845 93). *Methods Enzymol.* [https://doi.org/10.1016/S0076-6879\(07\)38006-3](https://doi.org/10.1016/S0076-6879(07)38006-3)
- 846 Kobia, F., Duchi, S., Deflorian, G., & Vaccari, T. (2014). Pharmacologic inhibition of vacuolar  
847 H<sup>+</sup> ATPase reduces physiologic and oncogenic Notch signaling. *Molecular Oncology*, 8(2),  
848 207–220. <https://doi.org/10.1016/j.molonc.2013.11.002>
- 849 Lam, S. S., Martell, J. D., Kamer, K. J., Deerinck, T. J., Ellisman, M. H., Mootha, V. K., & Ting,  
850 A. Y. (2015). Directed evolution of APEX2 for electron microscopy and proximity labeling.  
851 *Nature Methods*, 12(1). <https://doi.org/10.1038/nmeth.3179>
- 852 Li, L., Krantz, I. D., Deng, Y., Genin, A., Banta, A. B., Collins, C. C., Qi, M., Trask, B. J., Kuo,  
853 W. L., Cochran, J., Costa, T., Pierpont, M. E. M., Rand, E. B., Piccoli, D. A., Hood, L., &  
854 Spinner, N. B. (1997). Alagille syndrome is caused by mutations in human Jagged1, which  
855 encodes a ligand for notch1. *Nature Genetics*, 16(3), 243–251.  
856 <https://doi.org/10.1038/ng0797-243>
- 857 Louvet-Vallée, S. (2000). ERM proteins: From cellular architecture to cell signaling. In *Biology*  
858 *of the Cell* (Vol. 92, Issue 5, pp. 305–316). Elsevier Masson SAS.  
859 [https://doi.org/10.1016/S0248-4900\(00\)01078-9](https://doi.org/10.1016/S0248-4900(00)01078-9)
- 860 Ludwig, A., Hundhausen, C., Lambert, M., Broadway, N., Andrews, R., Bickett, D., Leesnitzer,  
861 M., & Becherer, J. (2005). Metalloproteinase inhibitors for the disintegrin-like  
862 metalloproteinases ADAM10 and ADAM17 that differentially block constitutive and phorbol  
863 ester-inducible shedding of cell surface molecules. *Combinatorial Chemistry & High*  
864 *Throughput Screening*, 8(2), 161–171. <https://doi.org/10.2174/1386207053258488>
- 865 Macia, E., Ehrlich, M., Massol, R., Boucrot, E., Brunner, C., & Kirchhausen, T. (2006). Dynasore,  
866 a Cell-Permeable Inhibitor of Dynamin. *Developmental Cell*, 10(6), 839–850.  
867 <https://doi.org/10.1016/j.devcel.2006.04.002>
- 868 Martin, A. P., Jacquemyn, M., Lipecka, J., Chhuon, C., Aushev, V. N., Meunier, B., Singh, M. K.,  
869 Carpi, N., Piel, M., Codogno, P., Hergovich, A., Parrini, M. C., Zalzman, G., Guerrero, I. C.,  
870 Daelemans, D., & Camonis, J. H. (2019). STK38 kinase acts as XPO1 gatekeeper regulating  
871 the nuclear export of autophagy proteins and other cargoes. *EMBO Reports*, 20(11).  
872 <https://doi.org/10.15252/embr.201948150>
- 873 Mauthe, M., Orhon, I., Rocchi, C., Zhou, X., Luhr, M., Hijlkema, K. J., Coppes, R. P., Engedal,  
874 N., Mari, M., & Reggiori, F. (2018). Chloroquine inhibits autophagic flux by decreasing



- 875 autophagosome-lysosome fusion. *Autophagy*, 14(8), 1435–1455.  
876 <https://doi.org/10.1080/15548627.2018.1474314>
- 877 May, E. A., Kalocsay, M., D’Auriac, I. G., Schuster, P. S., Gygi, S. P., Nachury, M. v., & Mick,  
878 D. U. (2021). Time-resolved proteomics profiling of the ciliary Hedgehog response. *The*  
879 *Journal of Cell Biology*, 220(5). <https://doi.org/10.1083/jcb.202007207>
- 880 McAlister, G. C., Nusinow, D. P., Jedrychowski, M. P., Wühr, M., Huttlin, E. L., Erickson, B. K.,  
881 Rad, R., Haas, W., & Gygi, S. P. (2014). MultiNotch MS3 enables accurate, sensitive, and  
882 multiplexed detection of differential expression across cancer cell line proteomes. *Analytical*  
883 *Chemistry*, 86(14), 7150–7158. <https://doi.org/10.1021/ac502040v>
- 884 Mccluskey, A., Daniel, J. A., Hadzic, G., Chau, N., Clayton, E. L., Mariana, A., Whiting, A.,  
885 Gorgani, N. N., Lloyd, J., Quan, A., Moshkanbaryans, L., Krishnan, S., Perera, S., Chircop,  
886 M., von Kleist, L., Mcgeachie, A. B., Howes, M. T., Parton, R. G., Campbell, M., ...  
887 Robinson, P. J. (2013). Building a better dynasore: The dyngo compounds potently inhibit  
888 dynamin and endocytosis. *Traffic*, 14(12), 1272–1289. <https://doi.org/10.1111/tra.12119>
- 889 Mittal, P., & Roberts, C. W. M. (2020). The SWI/SNF complex in cancer — biology, biomarkers  
890 and therapy. In *Nature Reviews Clinical Oncology* (Vol. 17, Issue 7, pp. 435–448). Nature  
891 Research. <https://doi.org/10.1038/s41571-020-0357-3>
- 892 Nam, Y., Sliz, P., Song, L., Aster, J. C., & Blacklow, S. C. (2006). Structural basis for cooperativity  
893 in recruitment of MAML coactivators to Notch transcription complexes. *Cell*, 124(5), 973–  
894 983. <https://doi.org/10.1016/j.cell.2005.12.037>
- 895 Oswald, F., Täuber, B., Dobner, T., Bourteele, S., Kostezka, U., Adler, G., Liptay, S., & Schmid,  
896 R. M. (2001). p300 acts as a transcriptional coactivator for mammalian Notch-1. *Molecular*  
897 *and Cellular Biology*, 21(22), 7761–7774. [https://doi.org/10.1128/MCB.21.22.7761-](https://doi.org/10.1128/MCB.21.22.7761-7774.2001)  
898 [7774.2001](https://doi.org/10.1128/MCB.21.22.7761-7774.2001)
- 899 Paek, J., Kalocsay, M., Staus, D. P., Wingler, L., Pascolutti, R., Paulo, J. A., Gygi, S. P., & Kruse,  
900 A. C. (2017). Multidimensional Tracking of GPCR Signaling via Peroxidase-Catalyzed  
901 Proximity Labeling. *Cell*, 169(2), 338–349.e11. <https://doi.org/10.1016/j.cell.2017.03.028>
- 902 Park, H., Hundley, F. v., Yu, Q., Overmyer, K. A., Brademan, D. R., Serrano, L., Paulo, J. A.,  
903 Paoli, J. C., Swarup, S., Coon, J. J., Gygi, S. P., & Wade Harper, J. (2022). Spatial snapshots  
904 of amyloid precursor protein intramembrane processing via early endosome proteomics.  
905 *Nature Communications* 2022 13:1, 13(1), 1–21. [https://doi.org/10.1038/s41467-022-33881-](https://doi.org/10.1038/s41467-022-33881-x)  
906 [x](https://doi.org/10.1038/s41467-022-33881-x)
- 907 Paulo, J. A., O’Connell, J. D., Everley, R. A., O’Brien, J., Gygi, M. A., & Gygi, S. P. (2016).  
908 Quantitative mass spectrometry-based multiplexing compares the abundance of 5000 *S.*  
909 *cerevisiae* proteins across 10 carbon sources. *Journal of Proteomics*, 148, 85–93.  
910 <https://doi.org/10.1016/j.jprot.2016.07.005>
- 911 Petcherski, A. G., & Kimble, J. (2000). Mastermind is a putative activator for Notch [1]. In *Current*  
912 *Biology* (Vol. 10, Issue 13). Current Biology Ltd. [https://doi.org/10.1016/S0960-](https://doi.org/10.1016/S0960-9822(00)00577-7)  
913 [9822\(00\)00577-7](https://doi.org/10.1016/S0960-9822(00)00577-7)
- 914 Pillidge, Z., & Bray, S. J. (2019). SWI / SNF chromatin remodeling controls Notch-responsive  
915 enhancer accessibility . *EMBO Reports*, 20(5). <https://doi.org/10.15252/embr.201846944>

- 916 Ran, F. A., Hsu, P. D., Wright, J., Agarwala, V., Scott, D. A., & Zhang, F. (2013). Genome  
917 engineering using the CRISPR-Cas9 system. *Nature Protocols*, 8(11), 2281–2308.  
918 <https://doi.org/10.1038/nprot.2013.143>
- 919 Rappsilber, J., Mann, M., & Ishihama, Y. (2007). Protocol for micro-purification, enrichment, pre-  
920 fractionation and storage of peptides for proteomics using StageTips. *Nature Protocols*, 2(8),  
921 1896–1906. <https://doi.org/10.1038/nprot.2007.261>
- 922 Rhee, H.-W., Zou, P., Udeshi, N. D., Martell, J. D., Mootha, V. K., Carr, S. a, & Ting, A. Y.  
923 (2013). Proteomic Mapping of Mitochondria in Living Cells via Spatially Restricted  
924 Enzymatic Tagging. *Science*, 1328(2013). <https://doi.org/10.1126/science.1230593>
- 925 Rogers, J. M., Guo, B., Egan, E. D., Aster, J. C., Adelman, K., & Blacklow, S. C. (2020). MAML1-  
926 Dependent Notch-Responsive Genes Exhibit Differing Cofactor Requirements for  
927 Transcriptional Activation. *Molecular and Cellular Biology*, 40(11).  
928 <https://doi.org/10.1128/mcb.00014-20>
- 929 Schindelin, J., Arganda-Carreras, I., Frise, E., Kaynig, V., Longair, M., Pietzsch, T., Preibisch, S.,  
930 Rueden, C., Saalfeld, S., Schmid, B., Tinevez, J. Y., White, D. J., Hartenstein, V., Eliceiri,  
931 K., Tomancak, P., & Cardona, A. (2012). Fiji: An open-source platform for biological-image  
932 analysis. In *Nature Methods* (Vol. 9, Issue 7, pp. 676–682). Nature Publishing Group.  
933 <https://doi.org/10.1038/nmeth.2019>
- 934 Seaman, M. N. J. (2012). The retromer complex-endosomal protein recycling and beyond. In  
935 *Journal of Cell Science* (Vol. 125, Issue 20, pp. 4693–4702). Company of Biologists.  
936 <https://doi.org/10.1242/jcs.103440>
- 937 Shanmugam, V., Craig, J. W., Hilton, L. K., Nguyen, M. H., Rushton, C. K., Fahimdanesh, K.,  
938 Lovitch, S., Ferland, B., Scott, D. W., & Aster, J. C. (2021). Notch activation is pervasive in  
939 SMZL and uncommon in DLBCL: implications for Notch signaling in B-cell tumors. *Blood*  
940 *Advances*, 5(1), 71. <https://doi.org/10.1182/BLOODADVANCES.2020002995>
- 941 Siebel, C., & Lendahl, U. (2017). Notch signaling in development, tissue homeostasis, and disease.  
942 *Physiological Reviews*, 97(4), 1235–1294. <https://doi.org/10.1152/physrev.00005.2017>
- 943 Simpson, M. A., Irving, M. D., Asilmaz, E., Gray, M. J., Dafou, D., Elmslie, F. v., Mansour, S.,  
944 Holder, S. E., Brain, C. E., Burton, B. K., Kim, K. H., Pauli, R. M., Aftimos, S., Stewart, H.,  
945 Kim, C. A., Holder-Espinasse, M., Robertson, S. P., Drake, W. M., & Trembath, R. C. (2011).  
946 Mutations in NOTCH2 cause Hajdu-Cheney syndrome, a disorder of severe and progressive  
947 bone loss. *Nature Genetics* 2011 43:4, 43(4), 303–305. <https://doi.org/10.1038/ng.779>
- 948 Sprinzak, D., & Blacklow, S. C. (2021). Biophysics of Notch Signaling. *Annual Review of*  
949 *Biophysics*, 50(1), 157–189. <https://doi.org/10.1146/annurev-biophys-101920-082204>
- 950 Turnpenny, P. D., Whittock, N., Duncan, J., Dunwoodie, S., Kusumi, K., & Ellard, S. (2003).  
951 Novel mutations in DLL3, a somitogenesis gene encoding a ligand for the Notch signalling  
952 pathway, cause a consistent pattern of abnormal vertebral segmentation in spondylocostal  
953 dysostosis. *Journal of Medical Genetics*, 40(5), 333. <https://doi.org/10.1136/JMG.40.5.333>
- 954 Vaccari, T., Duchi, S., Cortese, K., Tacchetti, C., & Bilder, D. (2010). The vacuolar ATPase is  
955 required for physiological as well as pathological activation of the Notch receptor.  
956 *Development*, 137(11), 1825–1832. <https://doi.org/10.1242/dev.045484>
- 957 Varnum-Finney, B., Brashem-Stein, C., & Bernstein, I. D. (2003). Combined effects of Notch  
958 signaling and cytokines induce a multiple log increase in precursors with lymphoid and

959 myeloid reconstituting ability. *Blood*, *101*(5), 1784–1789. <https://doi.org/10.1182/BLOOD->  
960 2002-06-1862

961 Wälde, S., Thakar, K., Hutten, S., Spillner, C., Nath, A., Rothbauer, U., Wiemann, S., &  
962 Kehlenbach, R. H. (2012). The Nucleoporin Nup358/RanBP2 Promotes Nuclear Import in a  
963 Cargo- and Transport Receptor-Specific Manner. *Traffic*, *13*(2), 218–233.  
964 <https://doi.org/10.1111/j.1600-0854.2011.01302.x>

965 Wallberg, A. E., Pedersen, K., Lendahl, U., & Roeder, R. G. (2002). p300 and PCAF act  
966 cooperatively to mediate transcriptional activation from chromatin templates by notch  
967 intracellular domains in vitro. *Molecular and Cellular Biology*, *22*(22), 7812–7819.  
968 <https://doi.org/10.1128/MCB.22.22.7812-7819.2002>

969 Wang, H., Zang, C., Taing, L., Arnett, K. L., Wong, Y. J., Pear, W. S., Blacklow, S. C., Liu, X.  
970 S., & Aster, J. C. (2014). NOTCH1-RBPJ complexes drive target gene expression through  
971 dynamic interactions with superenhancers. *Proceedings of the National Academy of Sciences*  
972 *of the United States of America*, *111*(2), 705–710.  
973 [https://doi.org/10.1073/PNAS.1315023111/SUPPL\\_FILE/PNAS.201315023SI.PDF](https://doi.org/10.1073/PNAS.1315023111/SUPPL_FILE/PNAS.201315023SI.PDF)

974 Wang, N. J., Sanborn, Z., Arnett, K. L., Bayston, L. J., Liao, W., Proby, C. M., Leigh, I. M.,  
975 Collisson, E. A., Gordon, P. B., Jakkula, L., Pennypacker, S., Zou, Y., Sharma, M., North, J.  
976 P., Vemula, S. S., Mauro, T. M., Neuhaus, I. M., LeBoit, P. E., Hur, J. S., ... Cho, R. J. (2011).  
977 Loss-of-function mutations in Notch receptors in cutaneous and lung squamous cell  
978 carcinoma. *Proceedings of the National Academy of Sciences of the United States of America*,  
979 *108*(43), 17761–17766. <https://doi.org/10.1073/PNAS.1114669108>

980 Wu, L., Aster, J. C., Blacklow, S. C., Lake, R., Artavanis-Tsakonas, S., & Griffin, J. D. (2000).  
981 MAML1, a human homologue of *Drosophila* mastermind, is a transcriptional co-activator for  
982 NOTCH receptors. *Nature Genetics*, *26*(4), 484–489. <https://doi.org/10.1038/82644>

983 Xu, J., Feng, H. T., Wang, C., Yip, K. H. M., Pavlos, N., Papadimitriou, J. M., Wood, D., & Zheng,  
984 M. H. (2003). Effects of bafilomycin A1: An inhibitor of vacuolar H (+)-ATPases on  
985 endocytosis and apoptosis in RAW cells and RAW cell-derived osteoclasts. *Journal of*  
986 *Cellular Biochemistry*, *88*(6), 1256–1264. <https://doi.org/10.1002/jcb.10477>

987 Yokoyama, N., Hayashi, N., Seki, T., Panté, N., Ohba, T., Nishii, K., Kuma, K., Hayashida, T.,  
988 Miyata, T., Aebi, U., Fukui, M., & Nishimoto, T. (1995). A giant nucleopore protein that  
989 binds Ran/TC4. *Nature*, *376*(6536), 184–188. <https://doi.org/10.1038/376184a0>

990 Yoshimori, T., Yamamoto, A., Moriyama, Y., Futai, M., & Tashiro, Y. (1991). Bafilomycin A1,  
991 a specific inhibitor of vacuolar-type H<sup>+</sup>-ATPase, inhibits acidification and protein  
992 degradation in lysosomes of cultured cells. *Journal of Biological Chemistry*, *266*(26), 17707–  
993 17712. [https://doi.org/10.1016/s0021-9258\(19\)47429-2](https://doi.org/10.1016/s0021-9258(19)47429-2)  
994

Figure 1

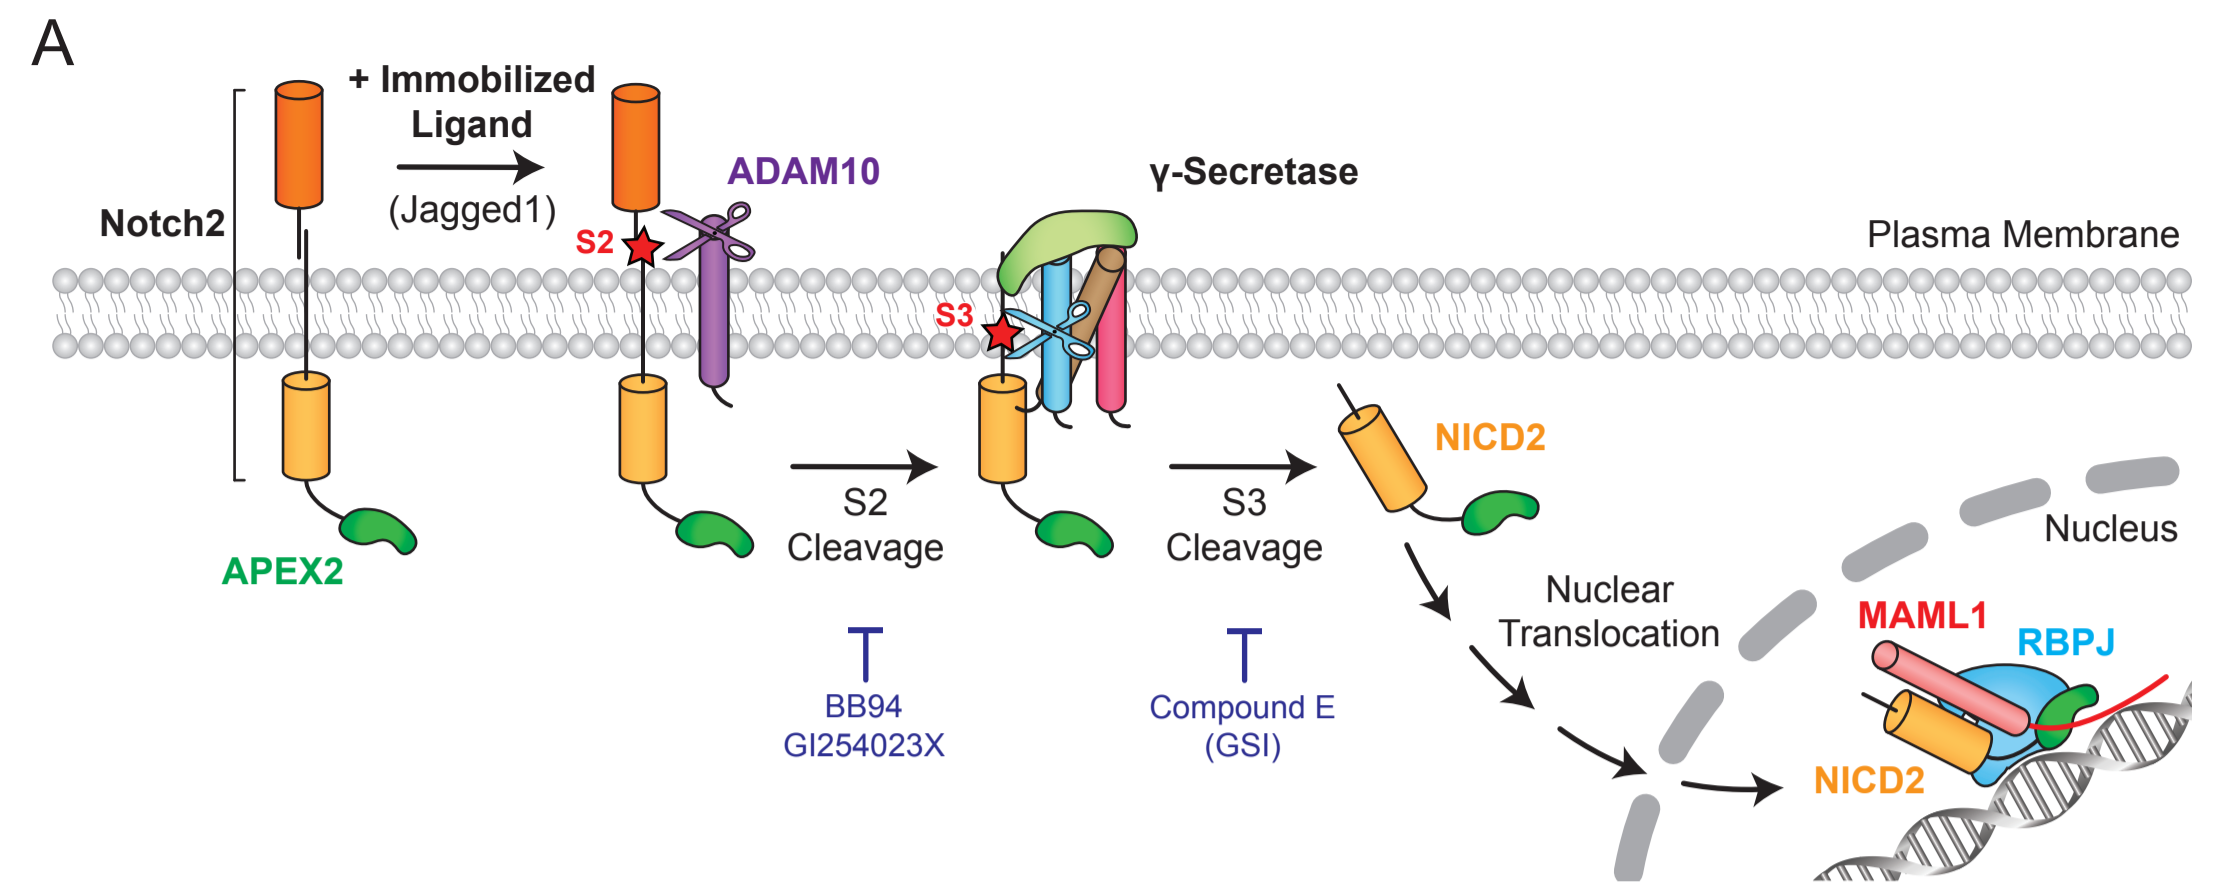

**B** Time-Resolved Proximity Labeling Design

Plated Jagged1, GSI washout dataset

bioRxiv preprint doi: <https://doi.org/10.1101/2022.12.21.51435>; this version posted December 21, 2022. The copyright holder for this preprint (which was not certified by peer review) is the author/funder. All rights reserved. No reuse allowed without permission.

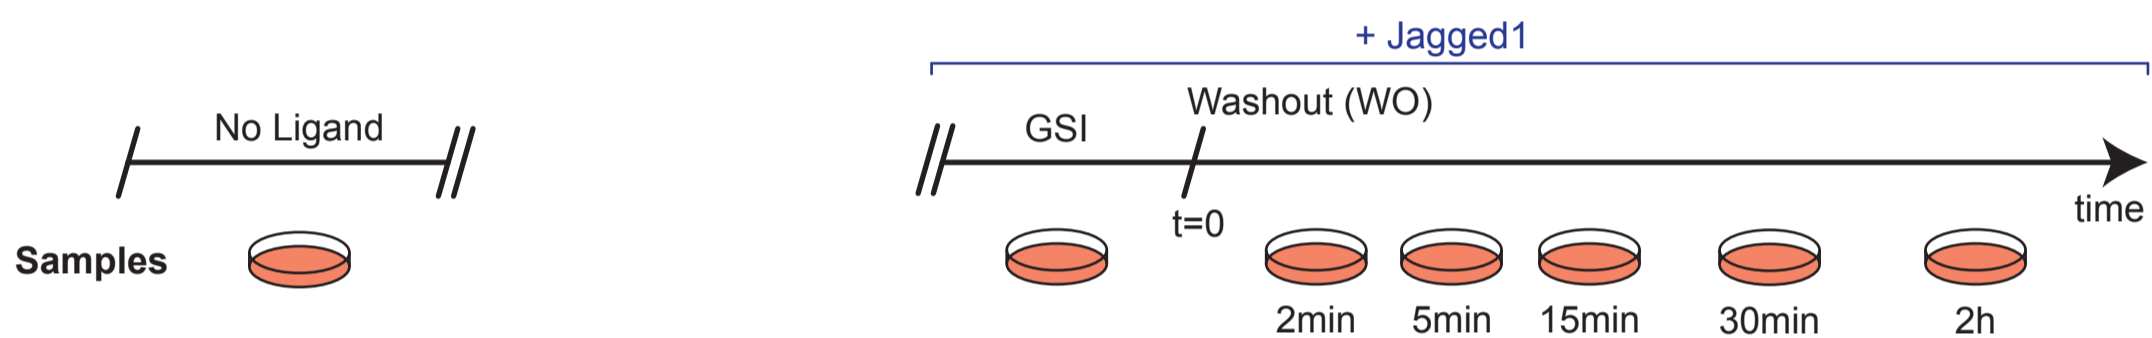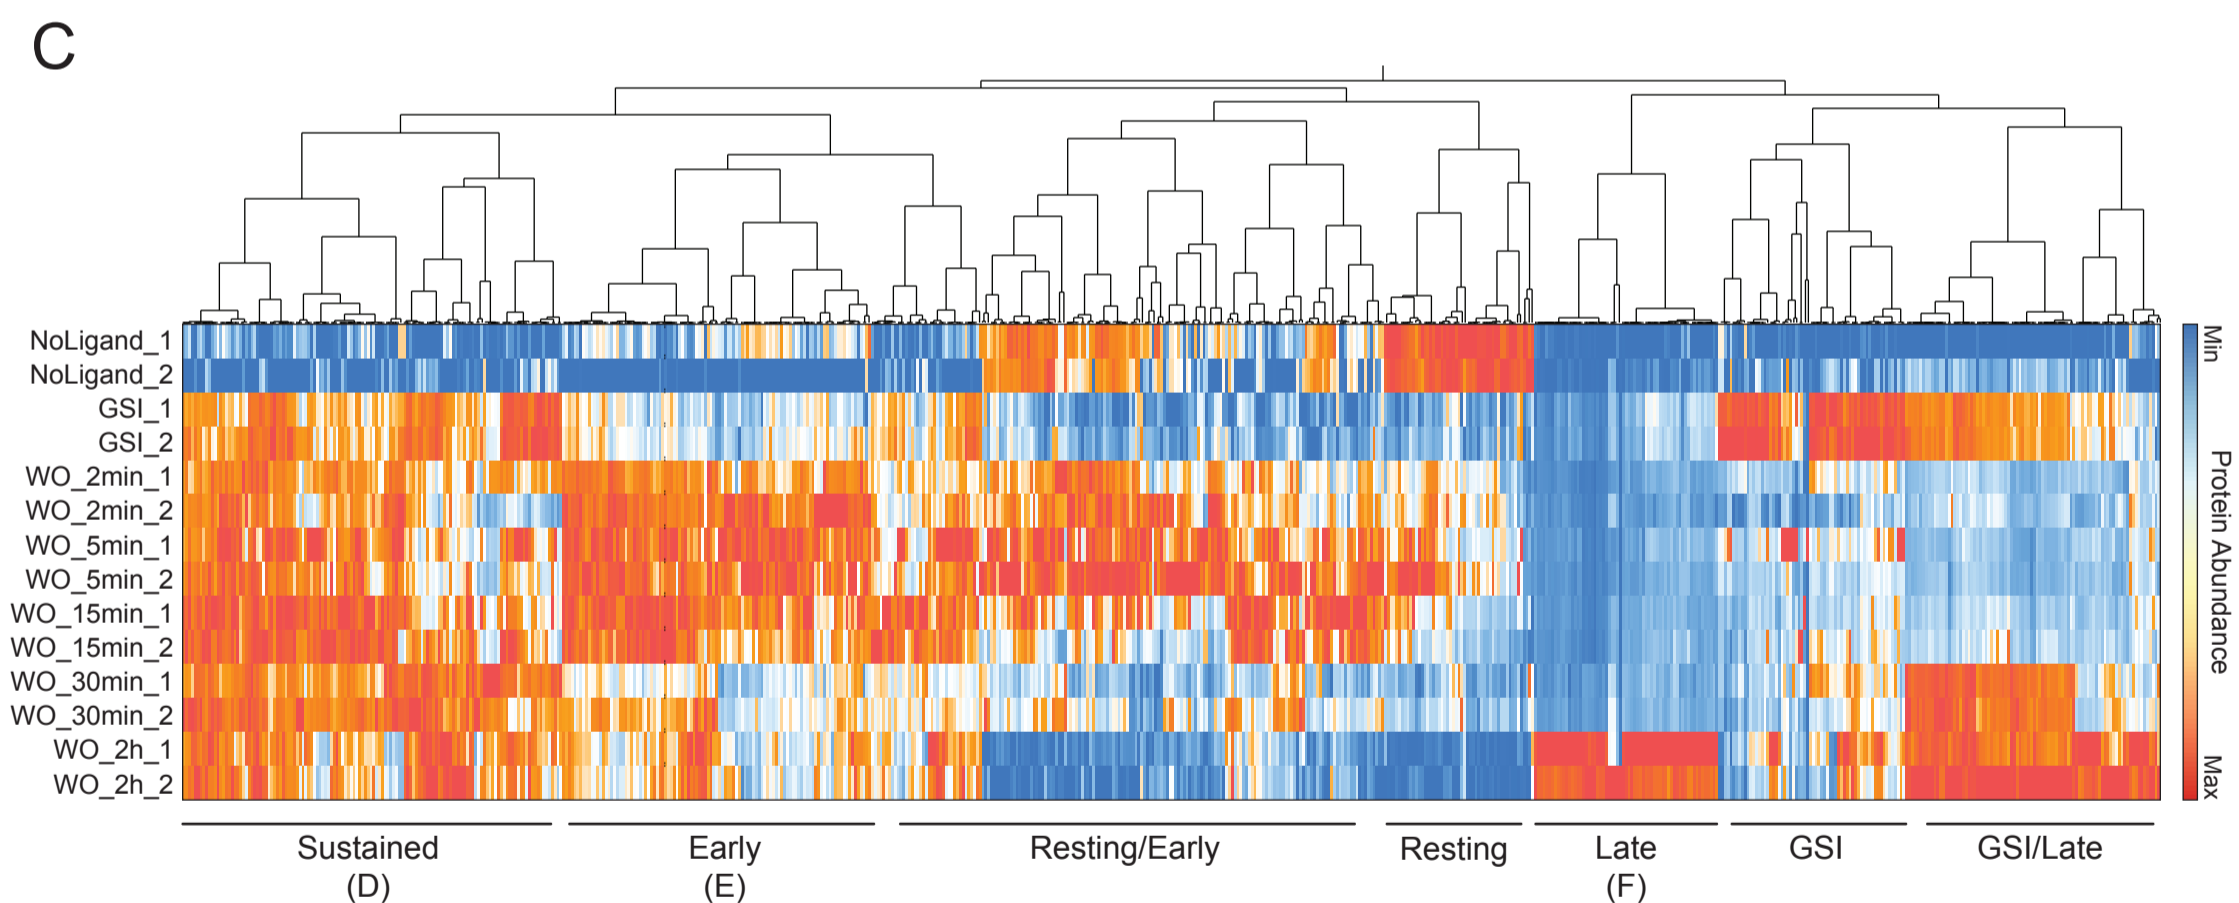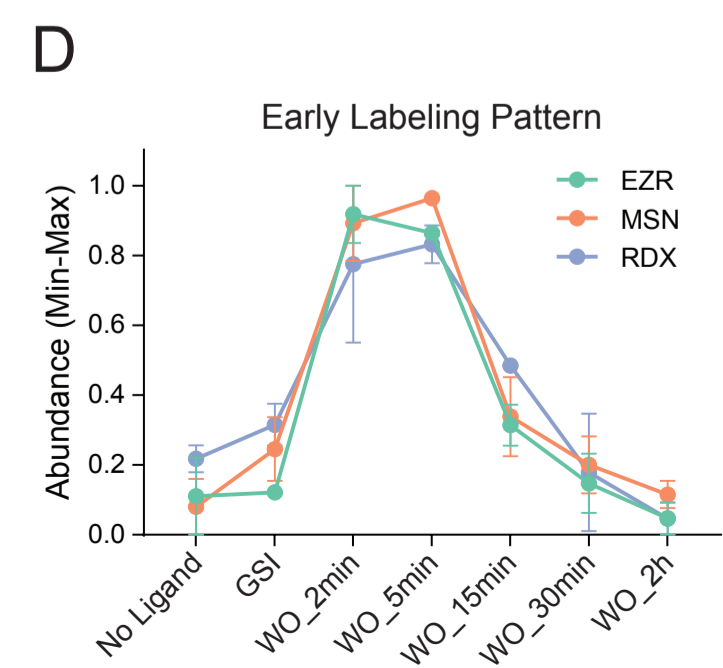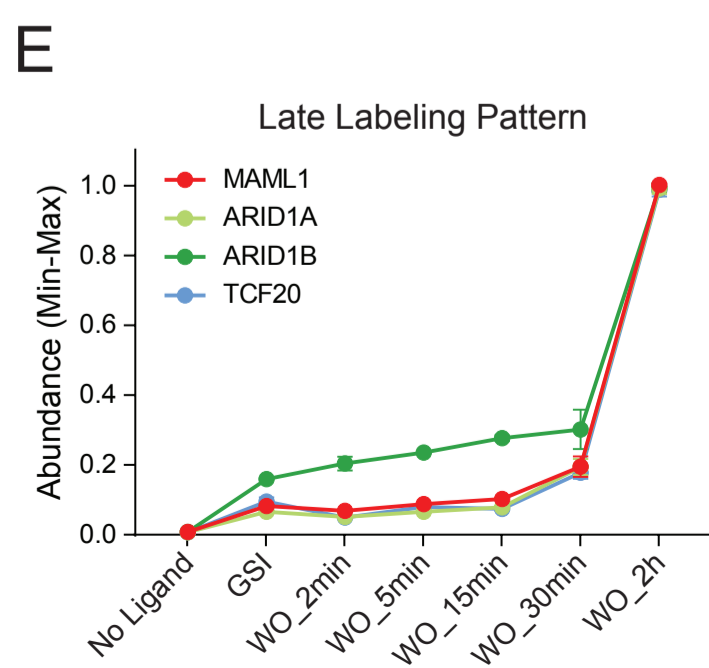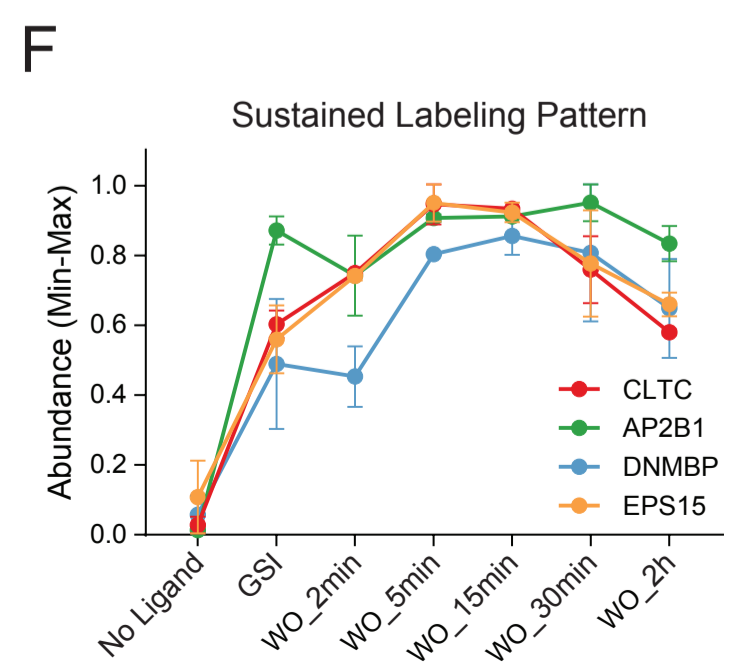

Figure 2

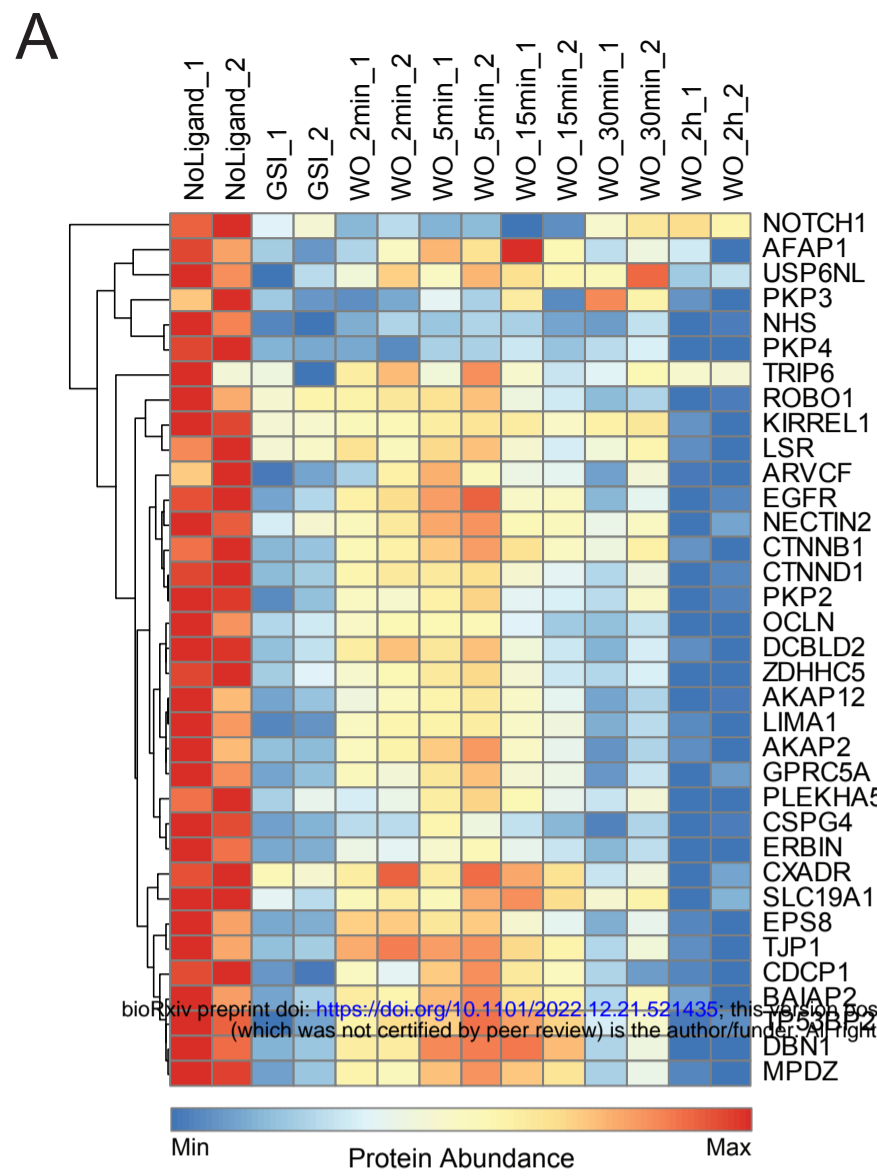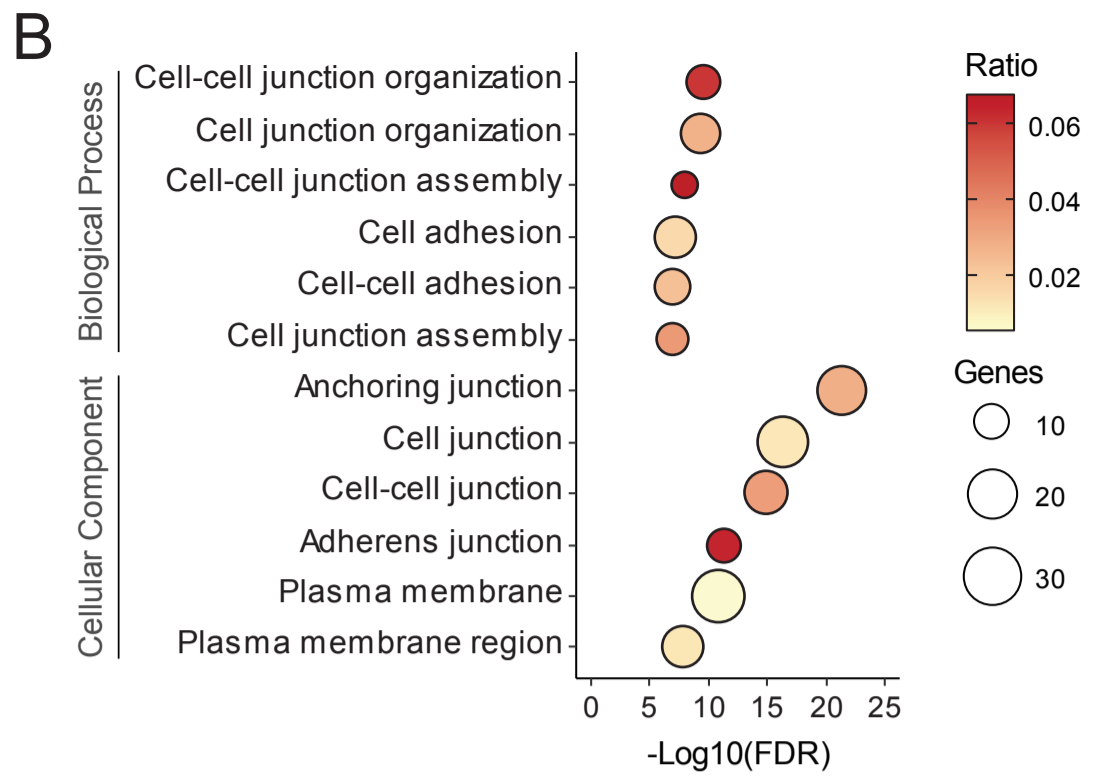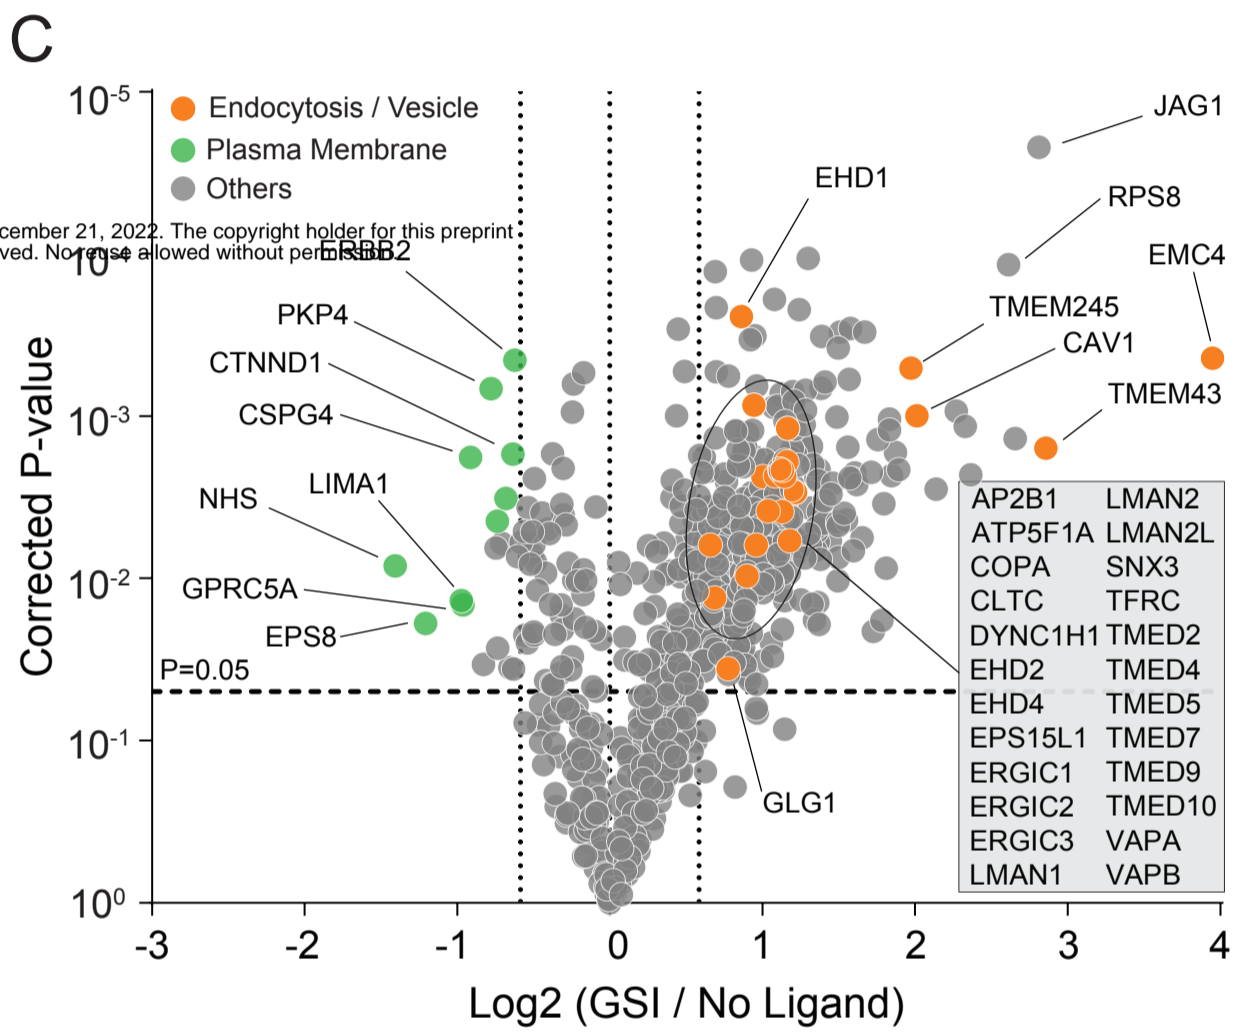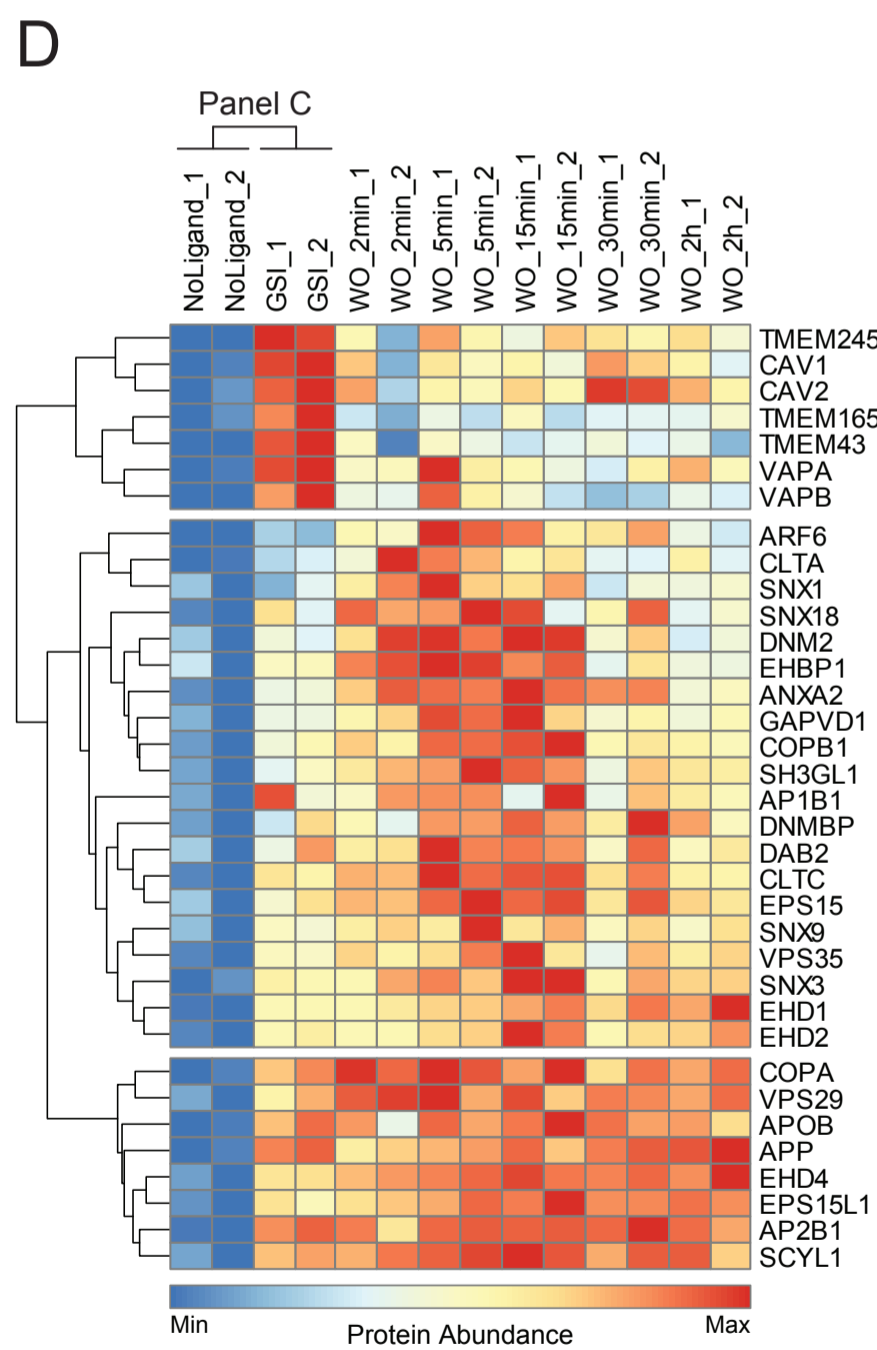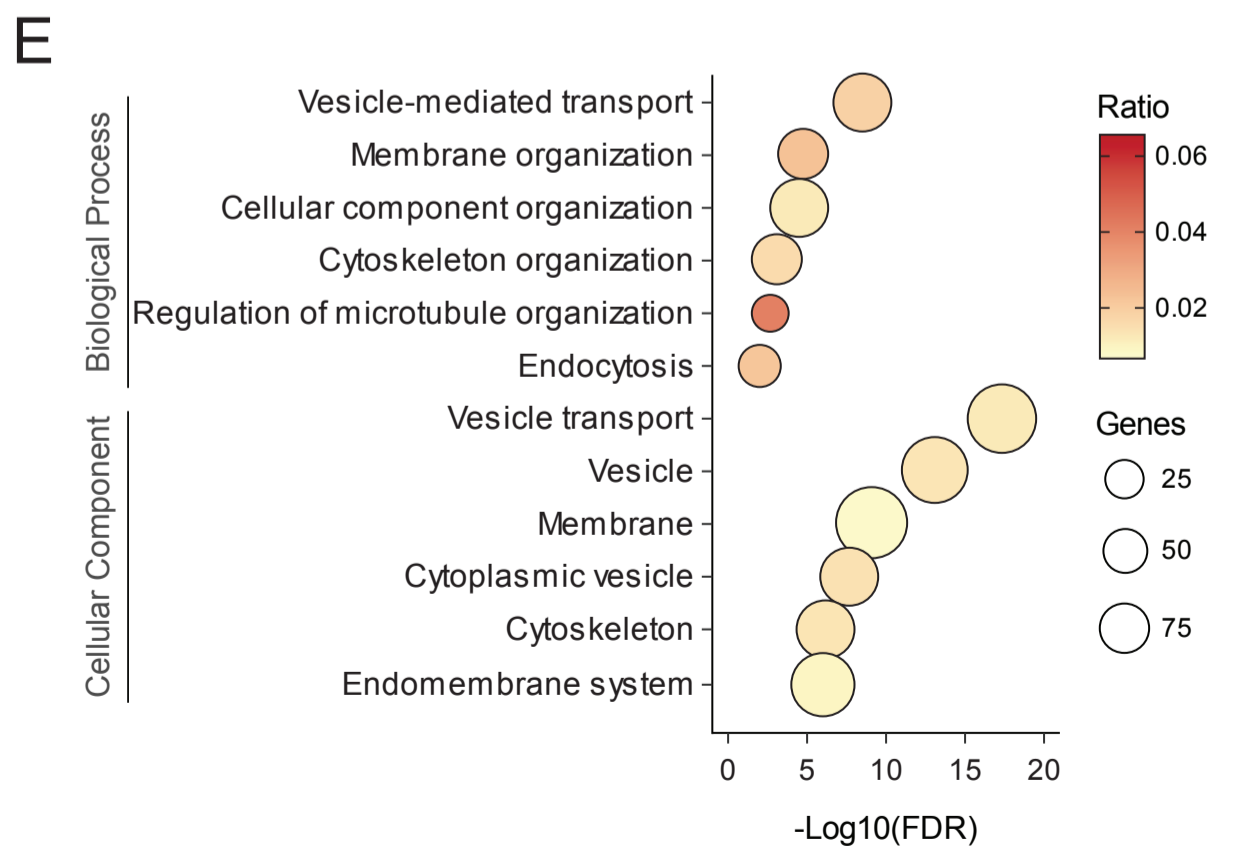

**Figure 3**

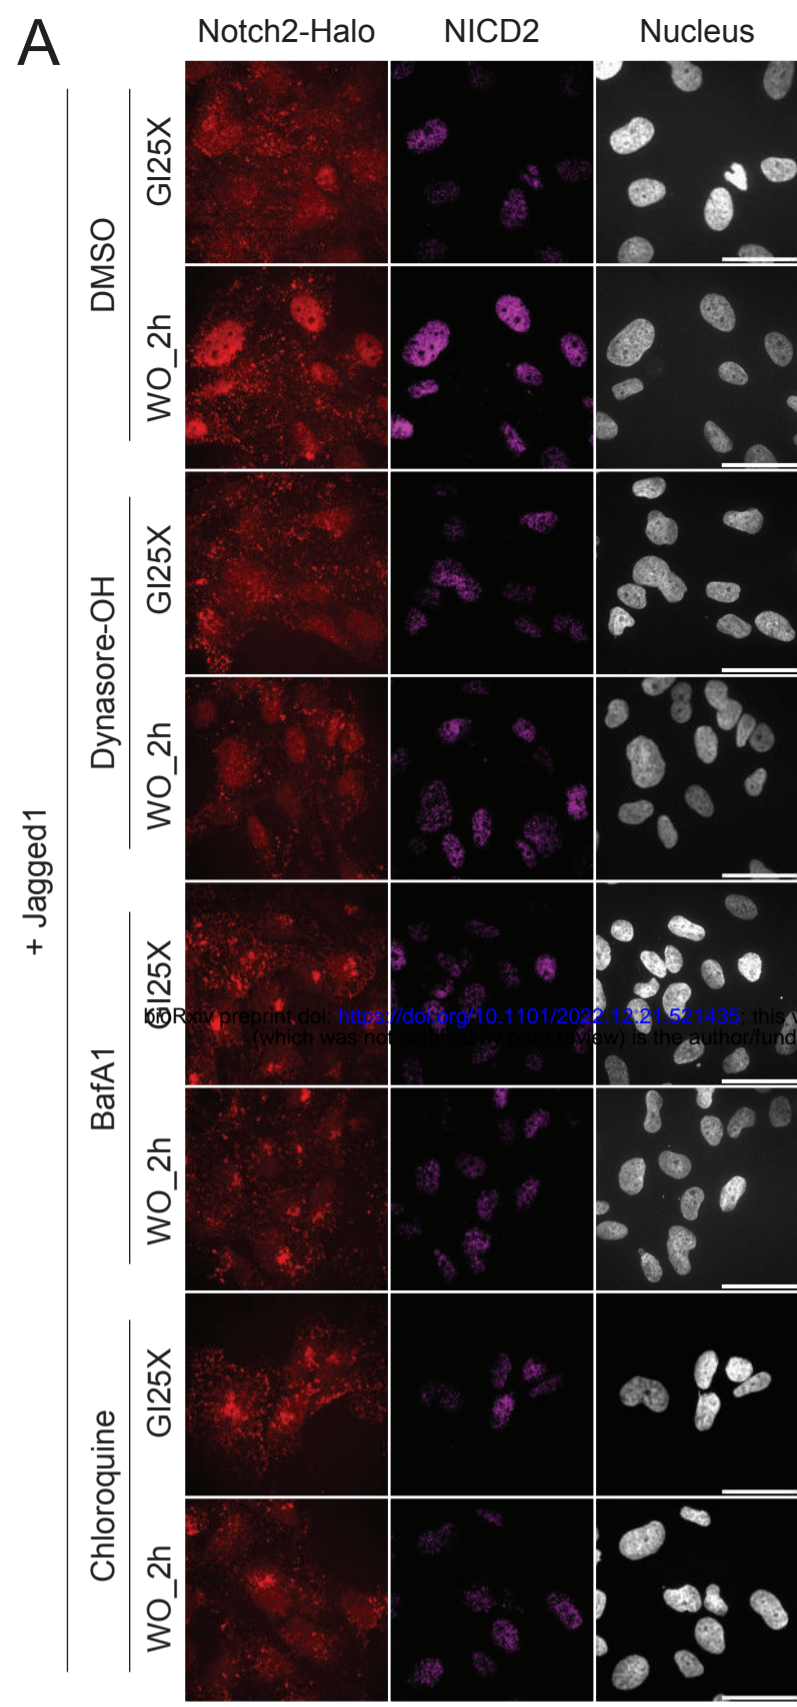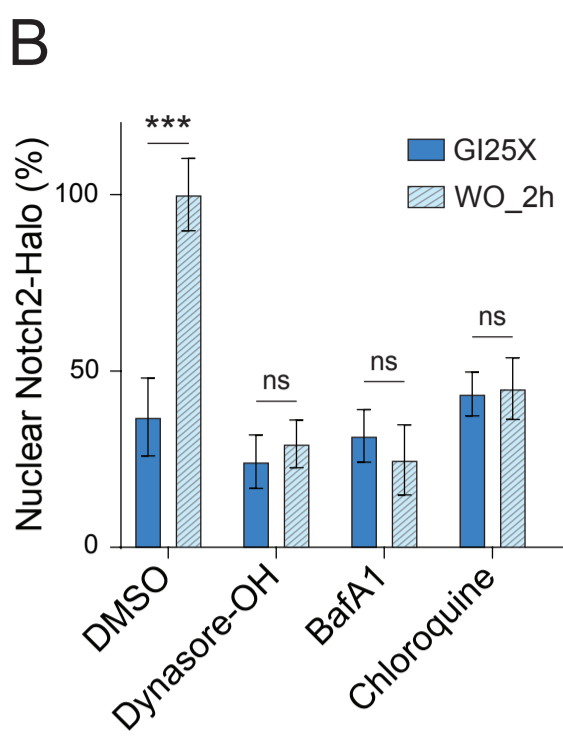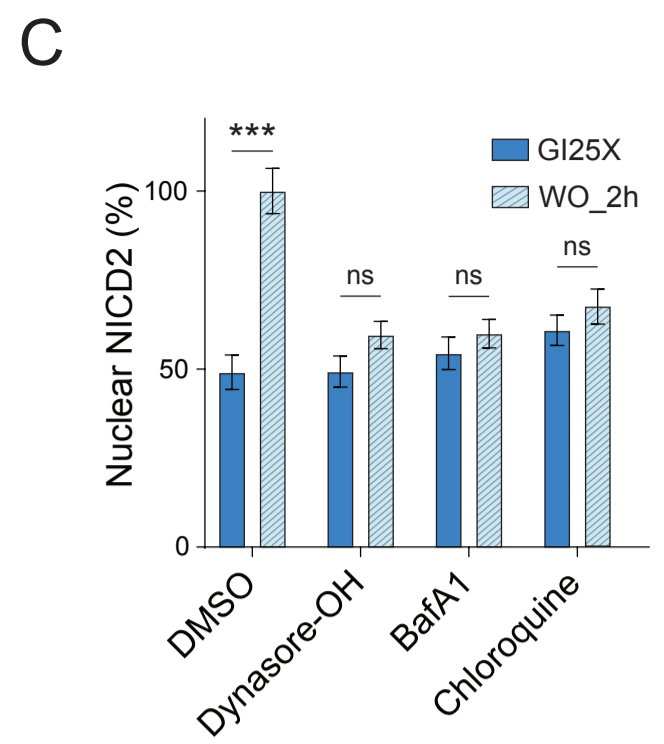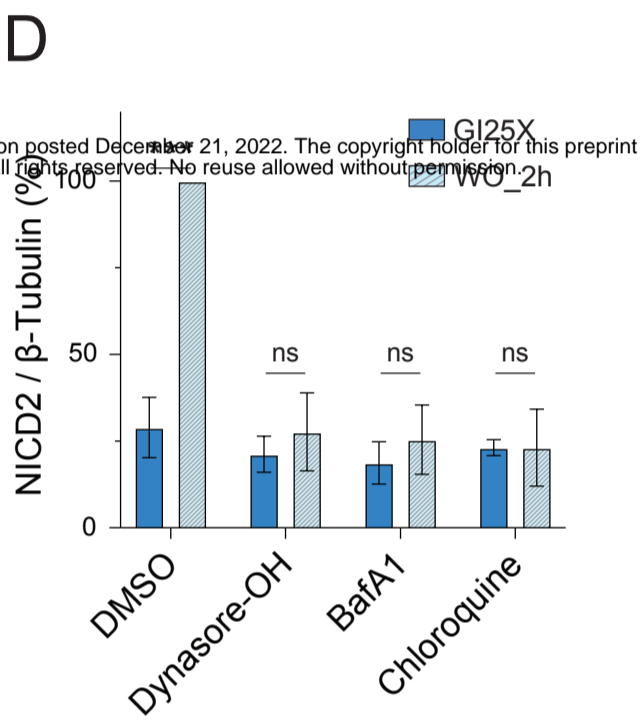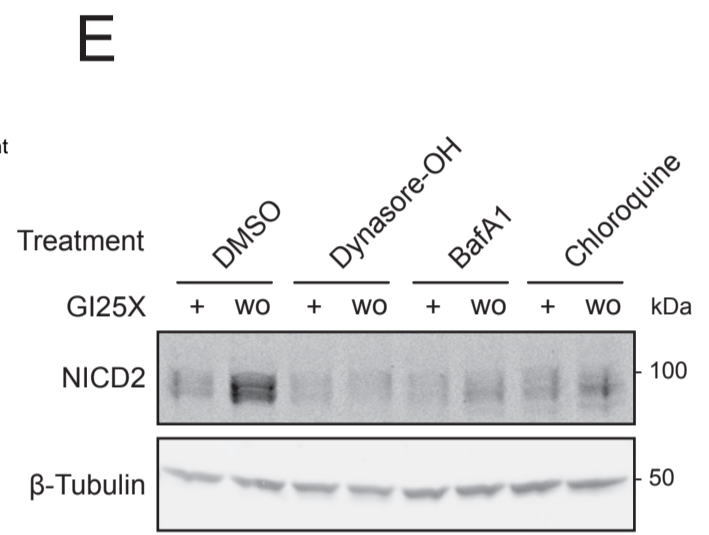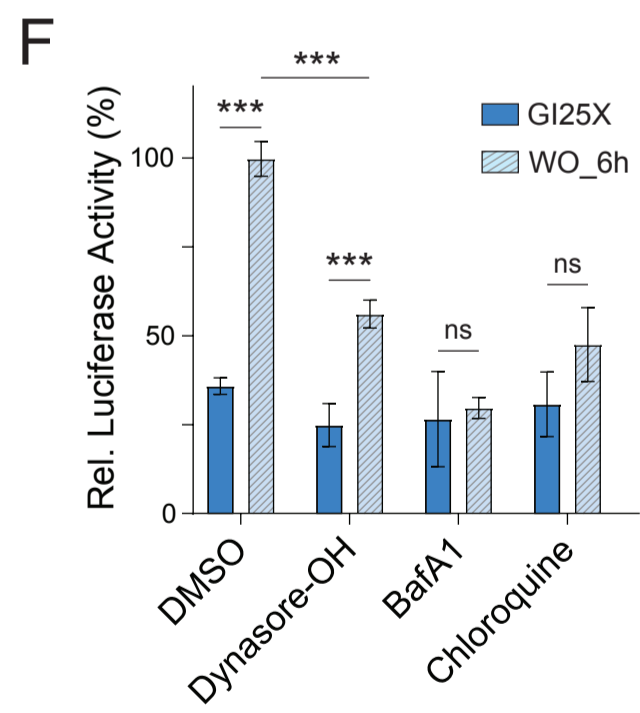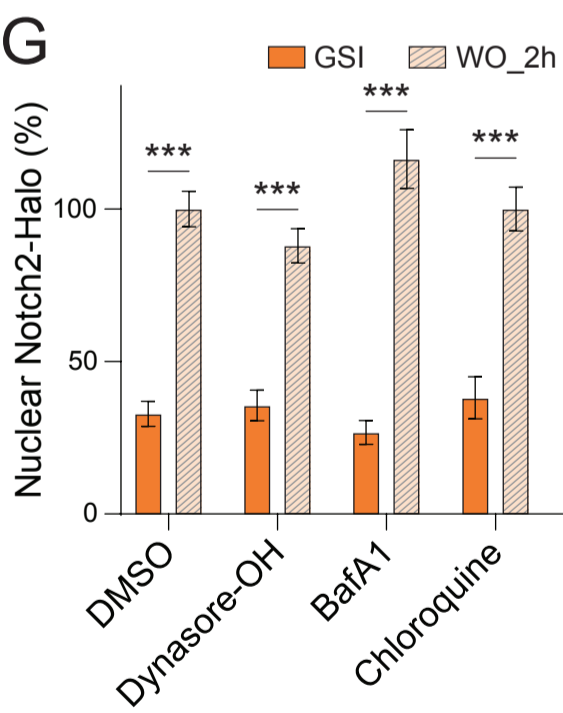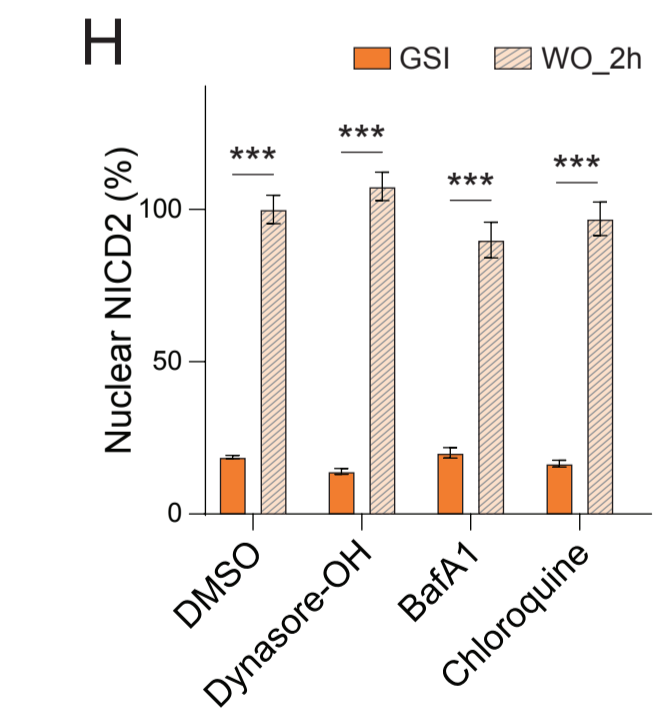

Figure 4

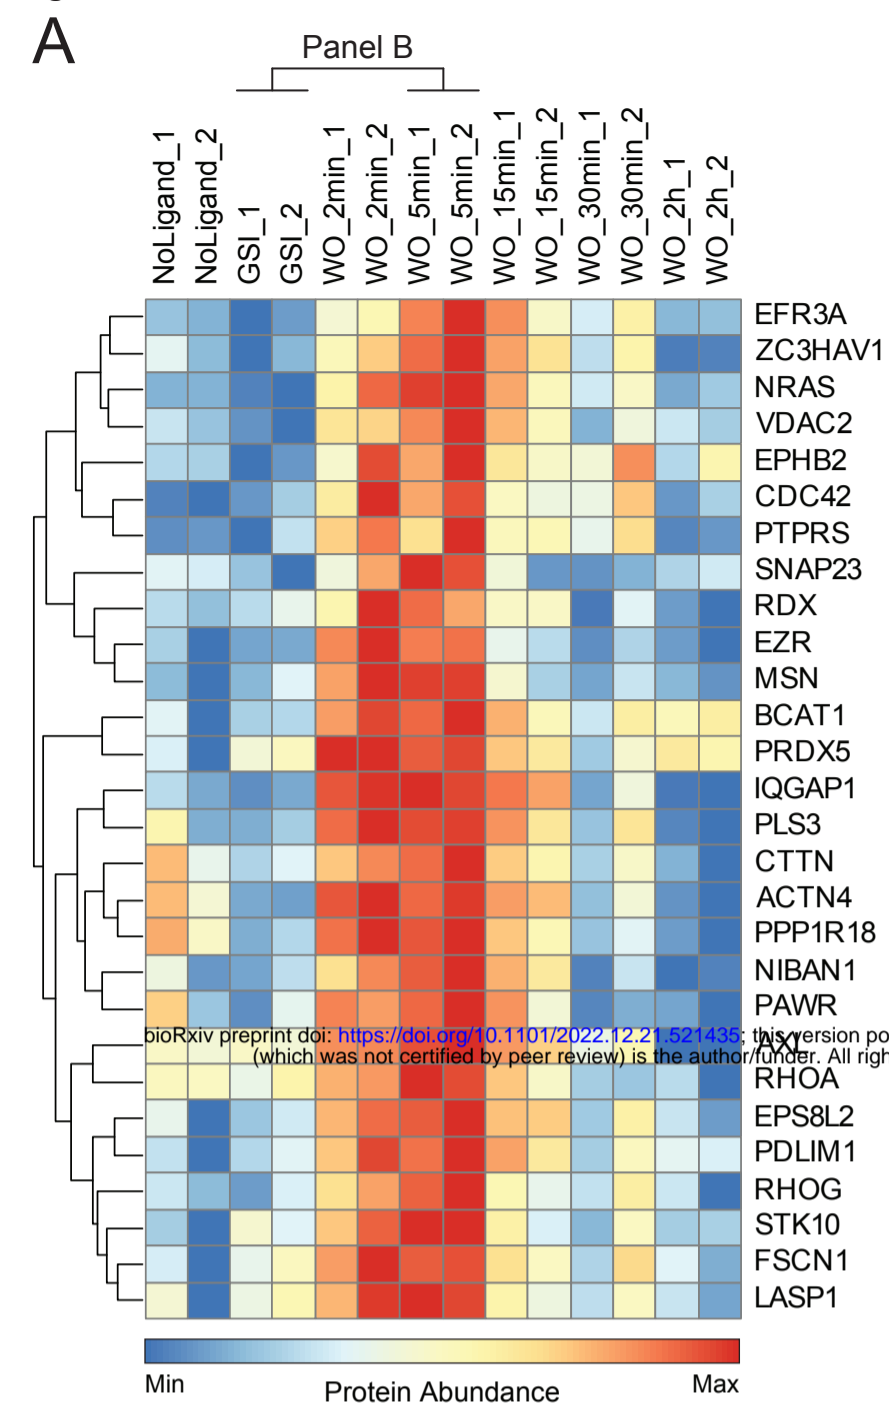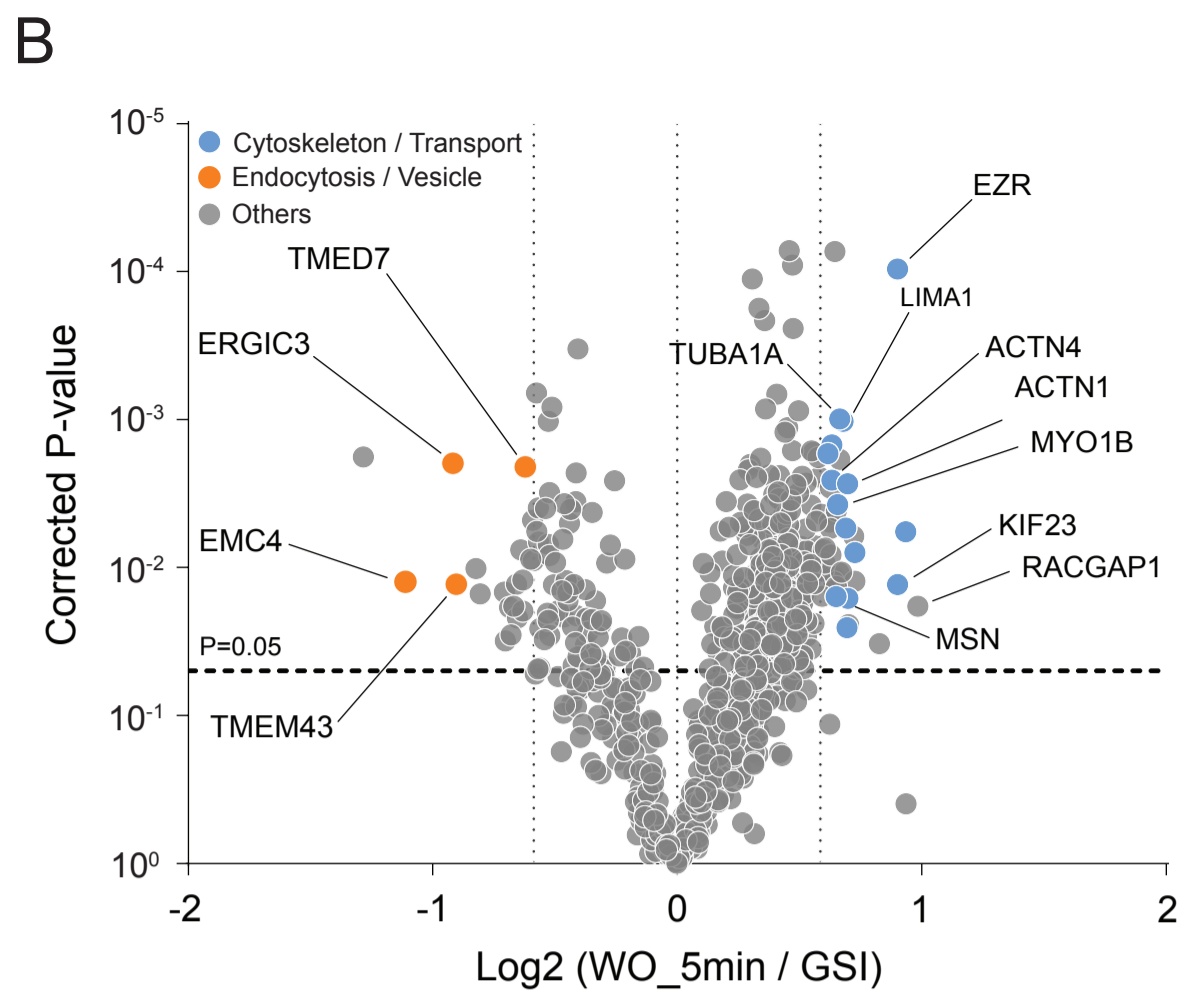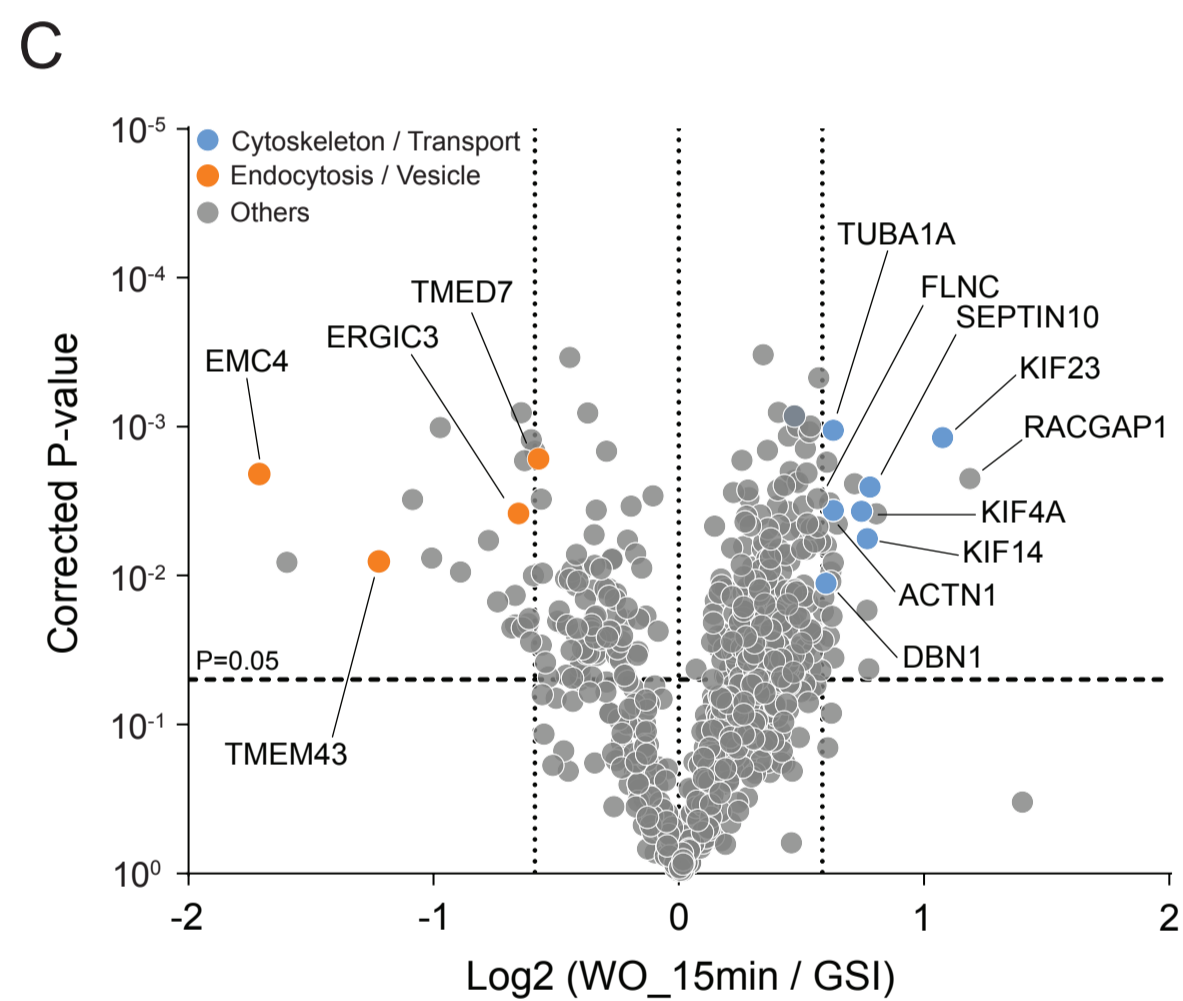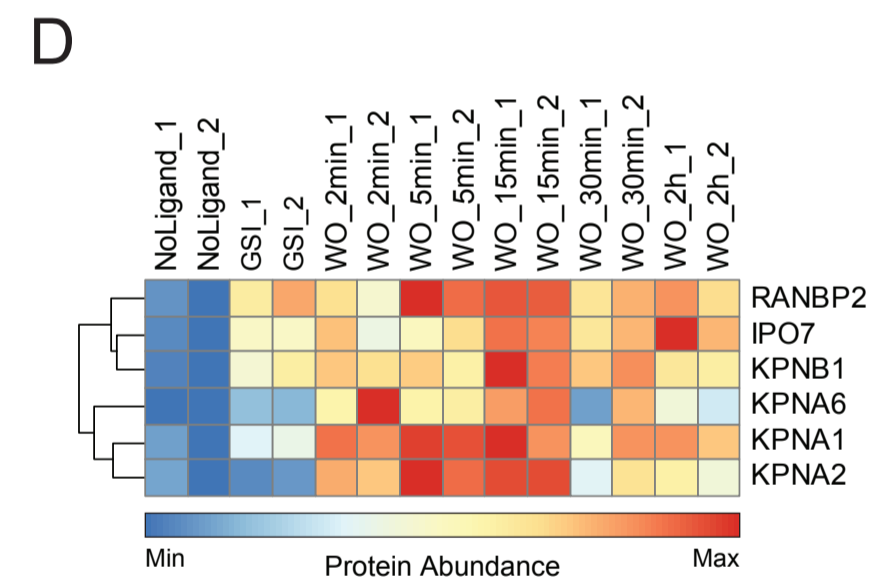

bioRxiv preprint doi: <https://doi.org/10.1101/2022.12.21.521435>; this version posted December 21, 2022. The copyright holder for this preprint (which was not certified by peer review) is the author/funder. All rights reserved. No reuse allowed without permission.

Figure 5

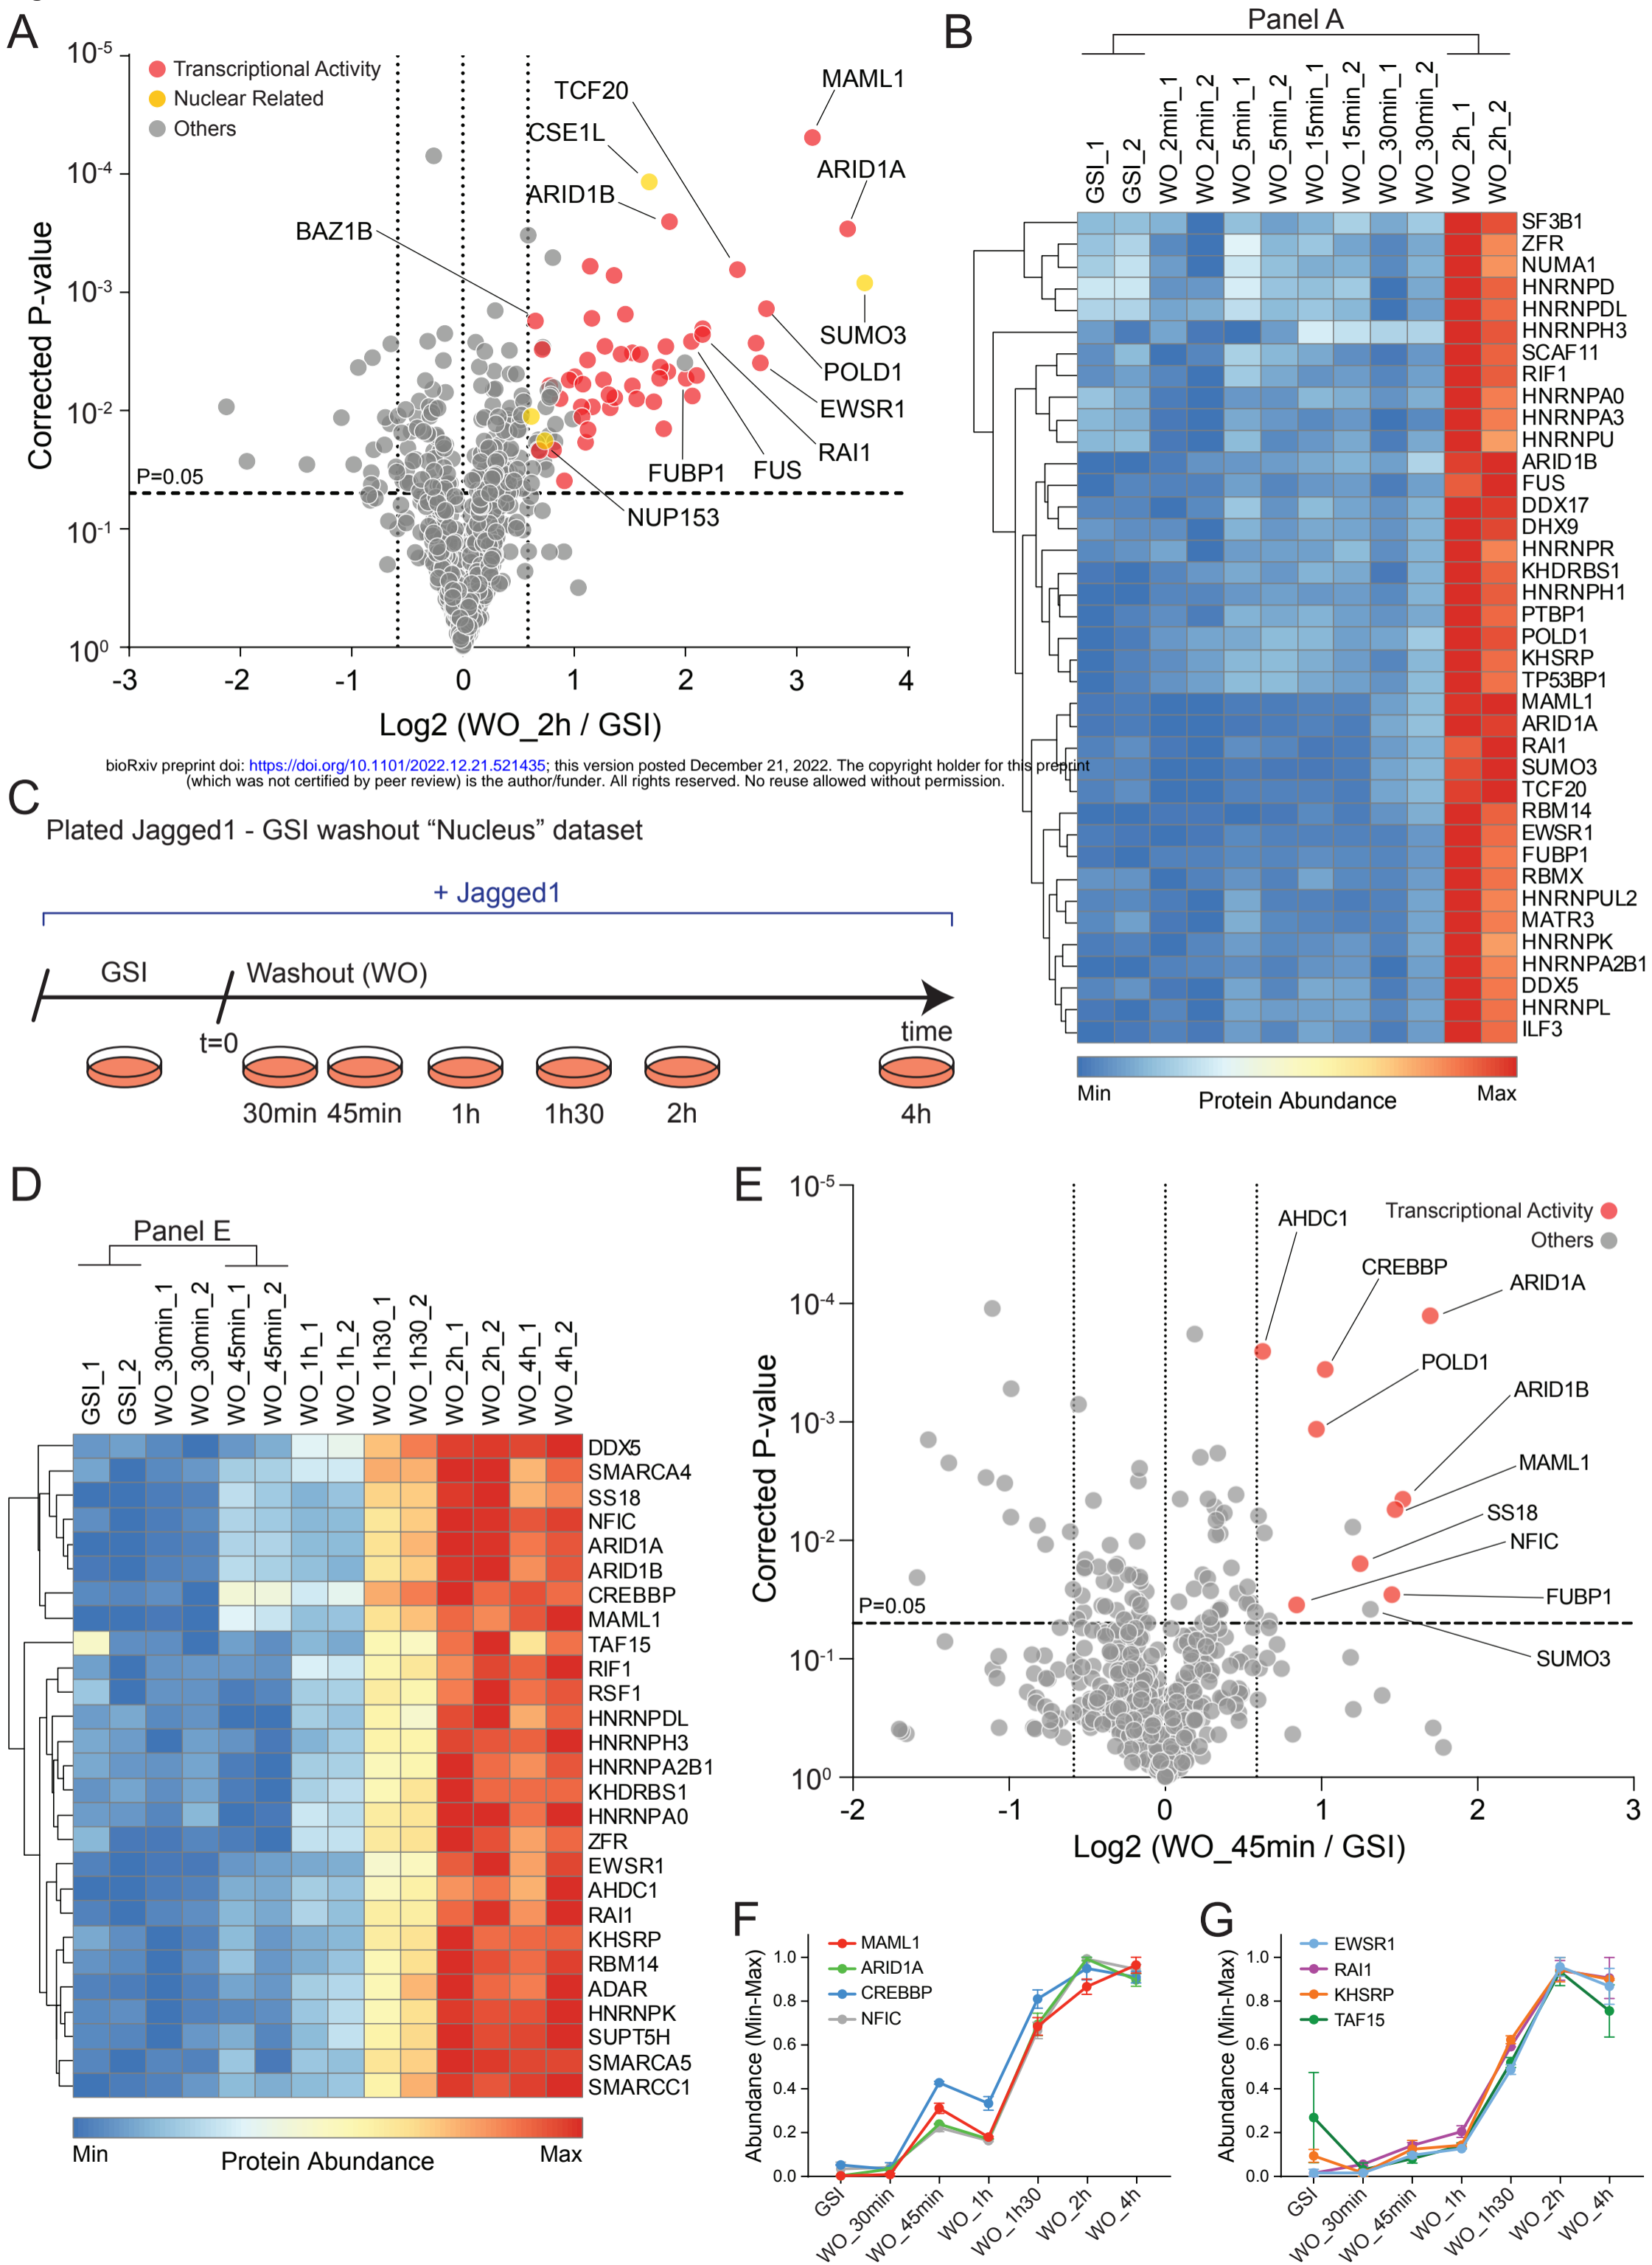



Figure 6

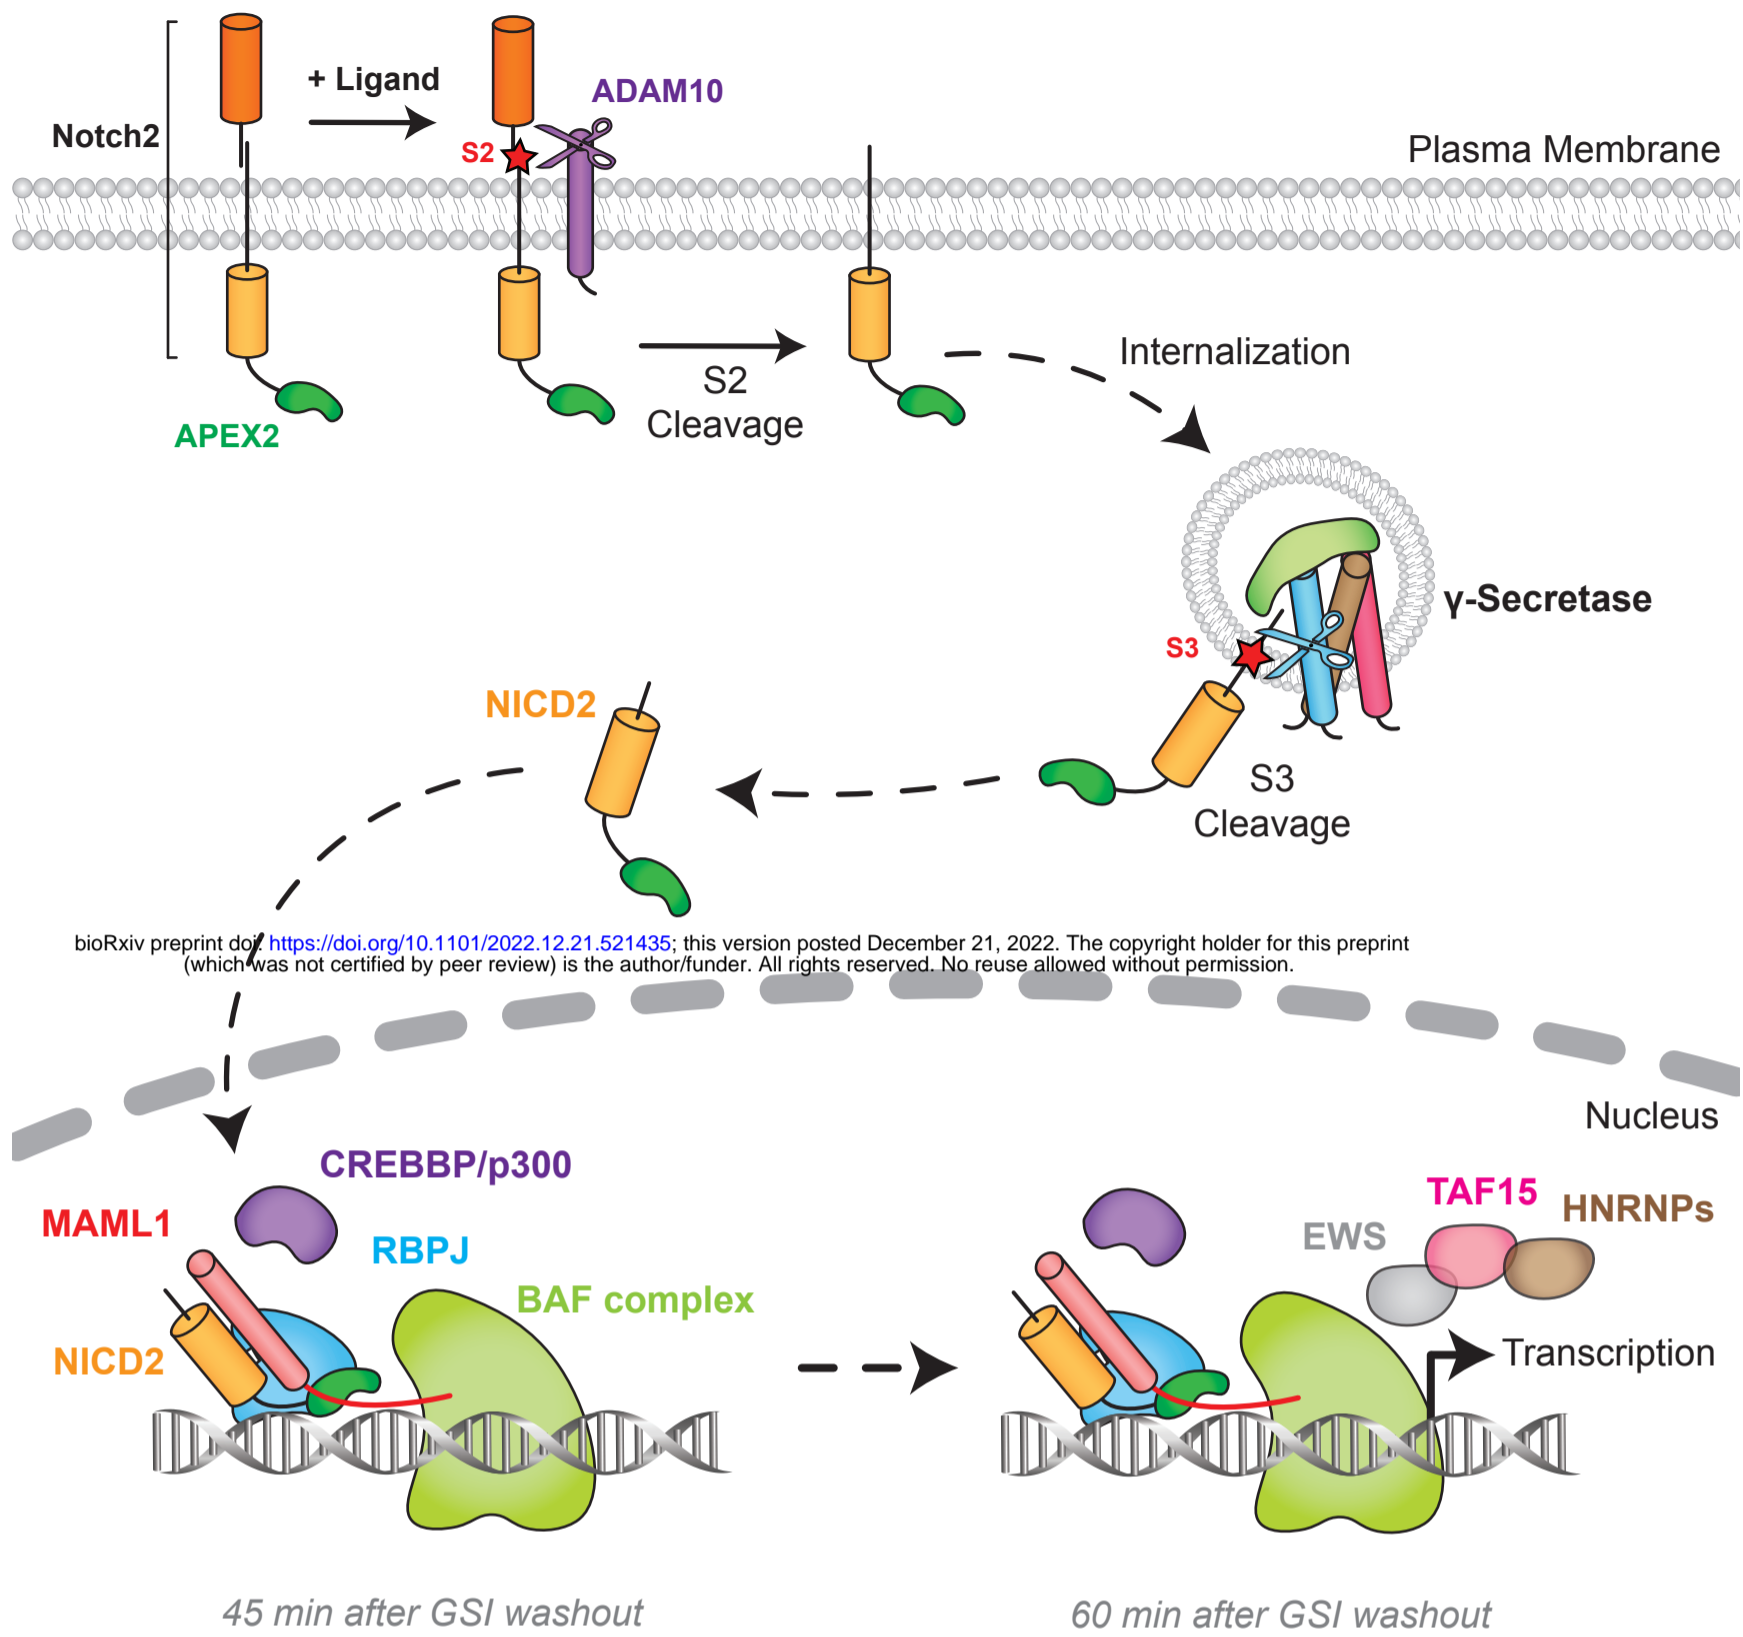

A

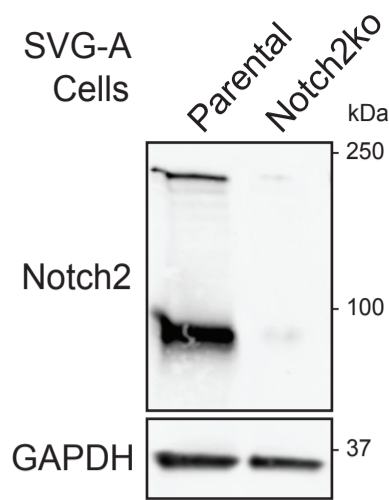

B

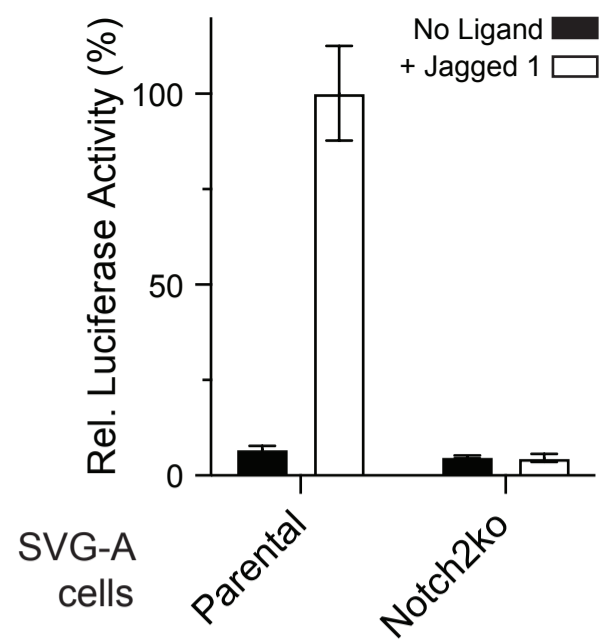

C

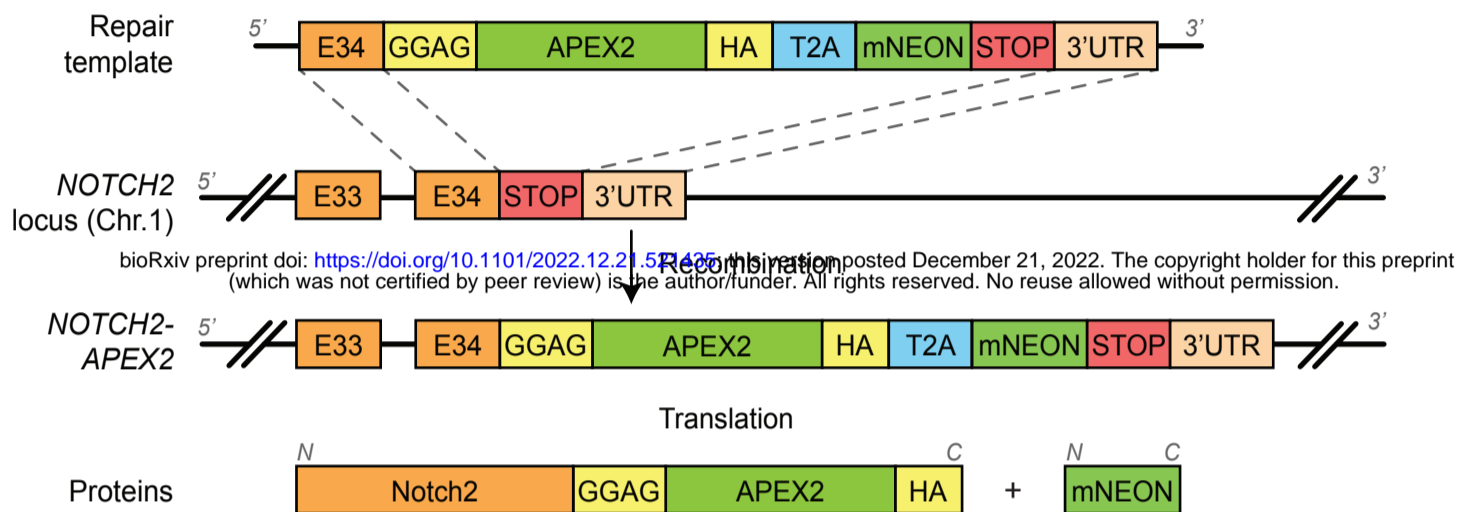

D

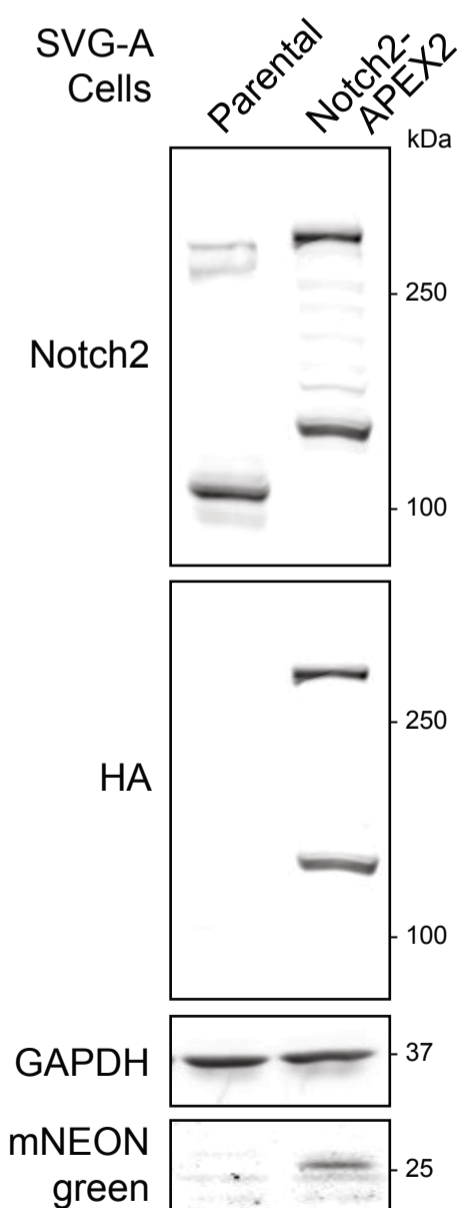

E

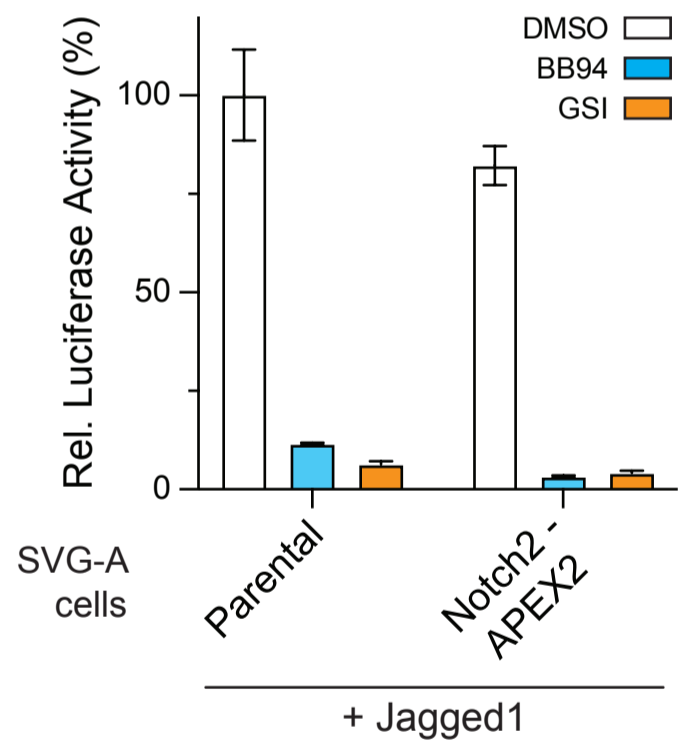

F

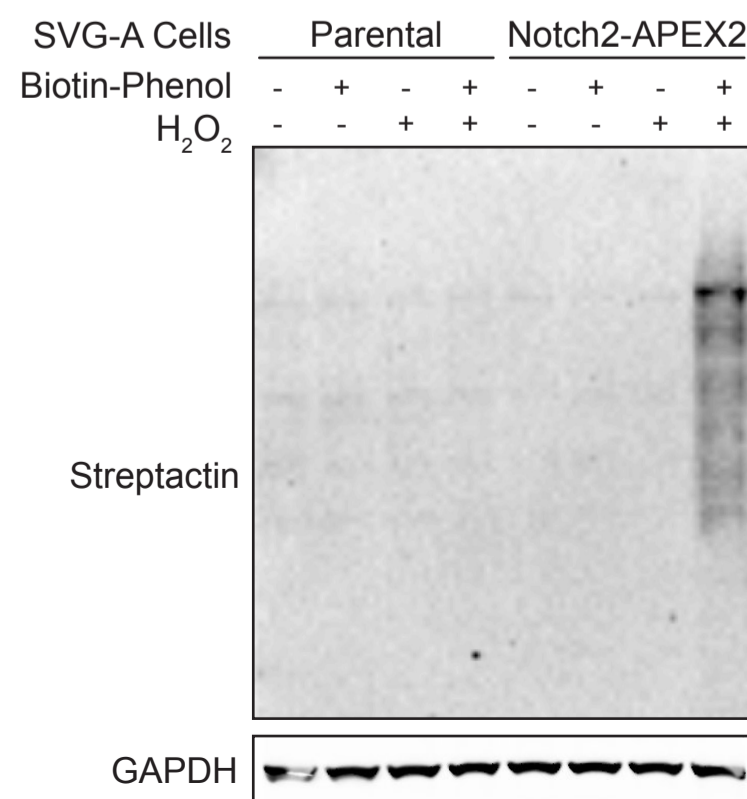

A

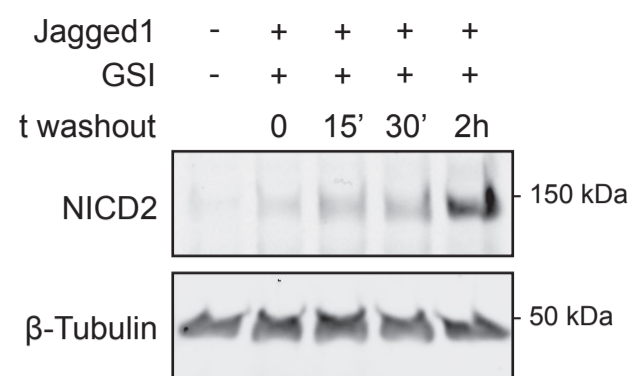

B

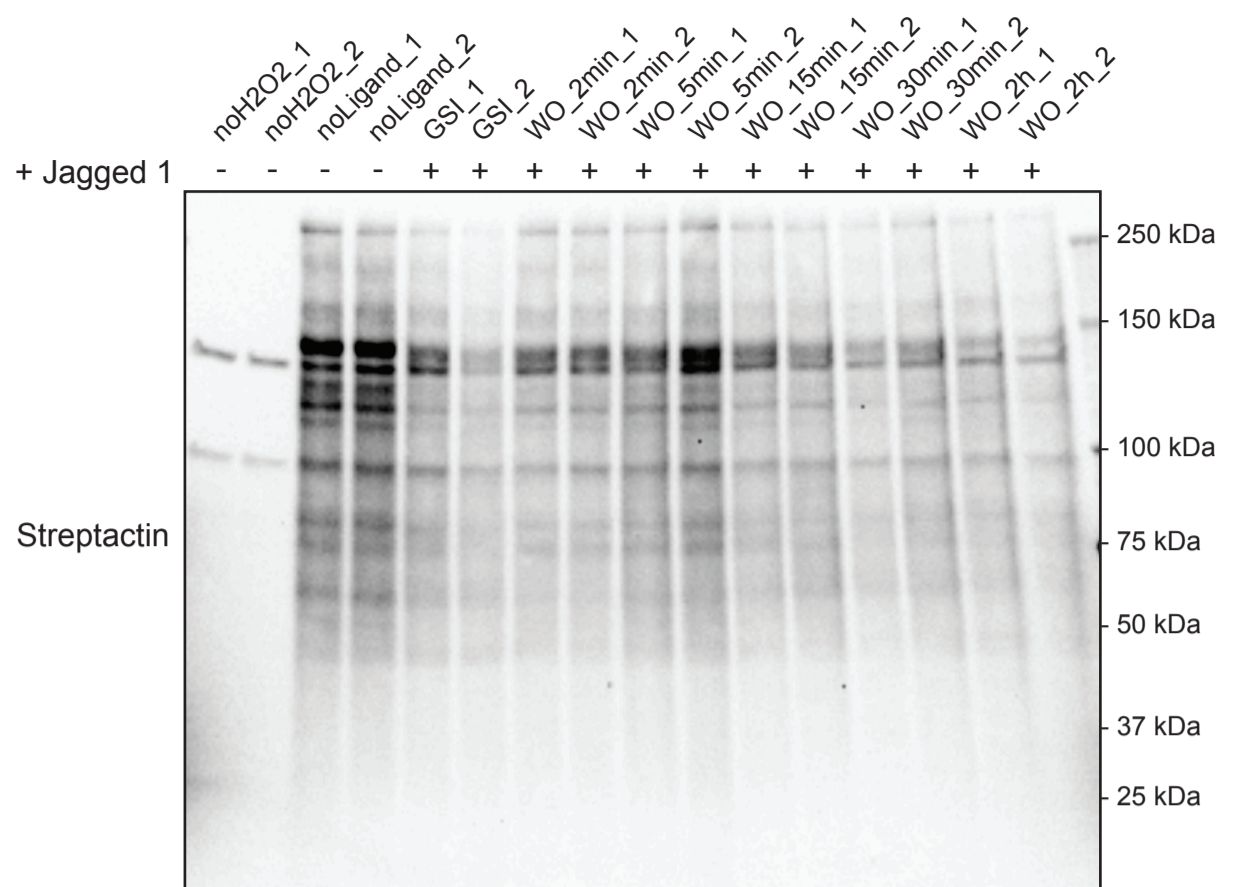

Supplemental Figure 3

A

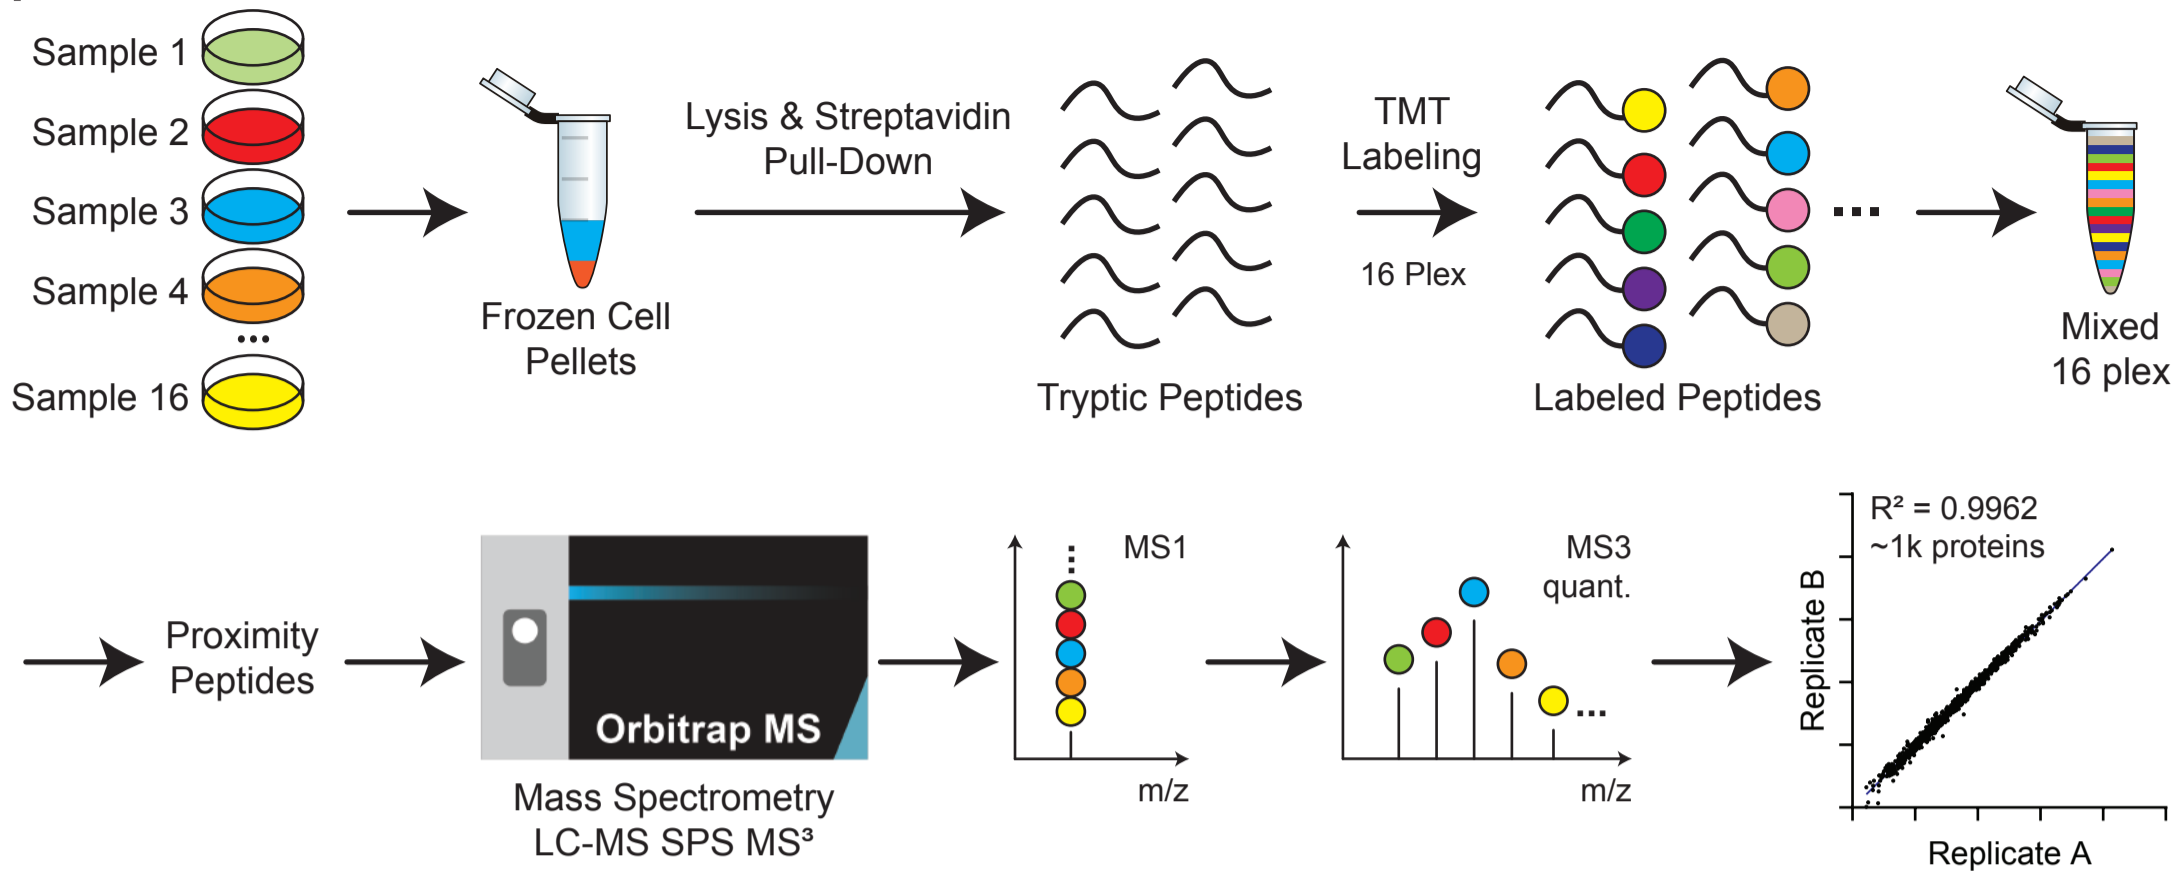

B

bioRxiv preprint doi: <https://doi.org/10.1101/2022.12.21.521435>; this version posted December 21, 2022. The copyright holder for this preprint (which was not certified by peer review) is the author/funder. All rights reserved. No reuse allowed without permission.

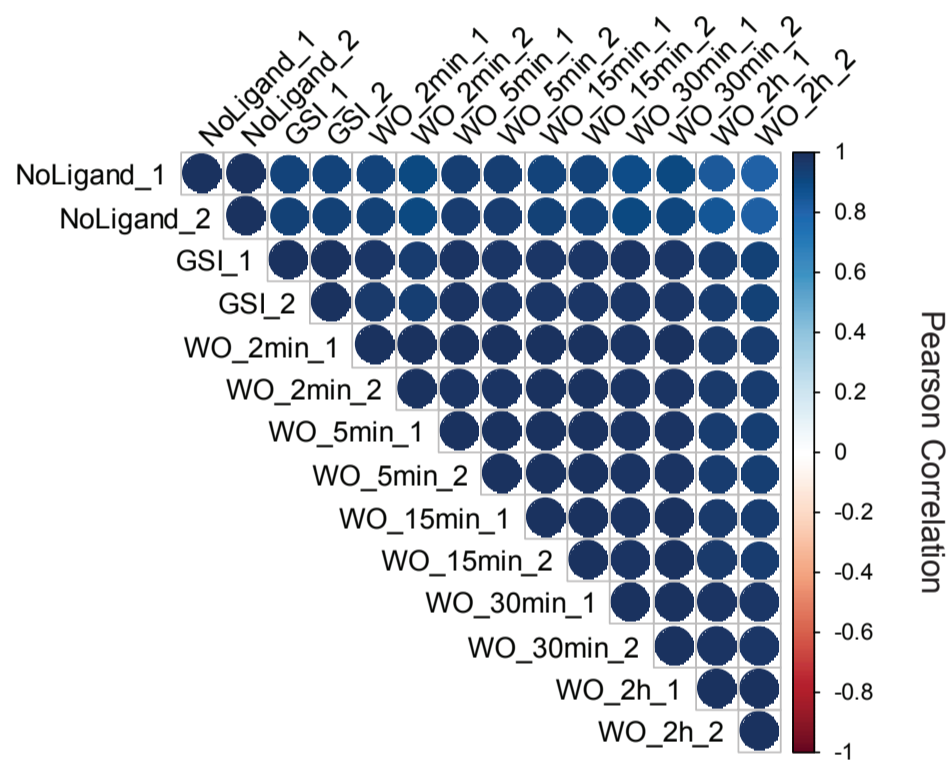

C

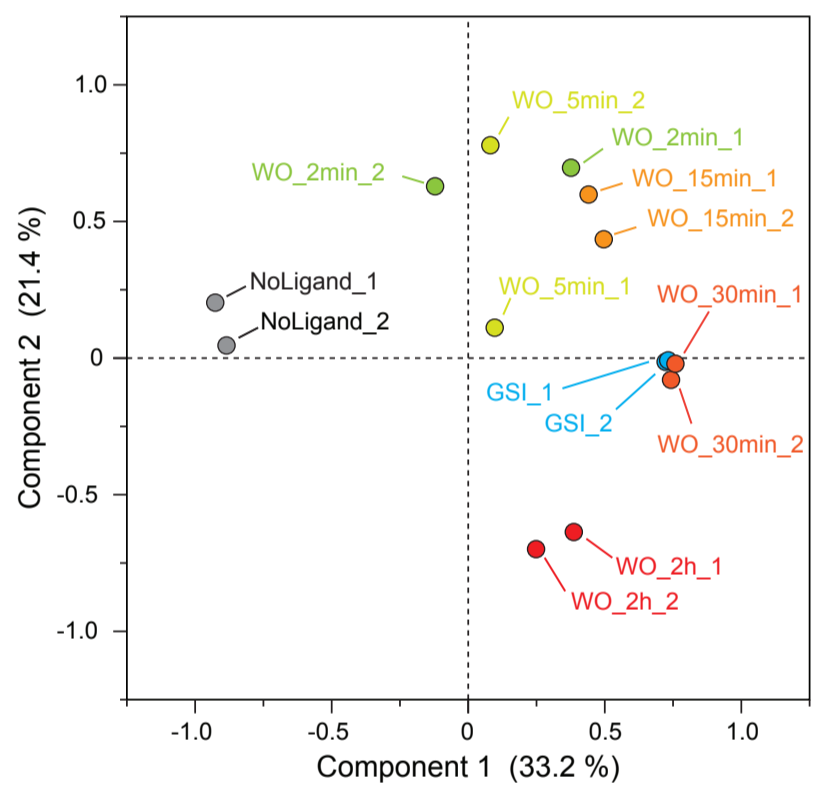

D

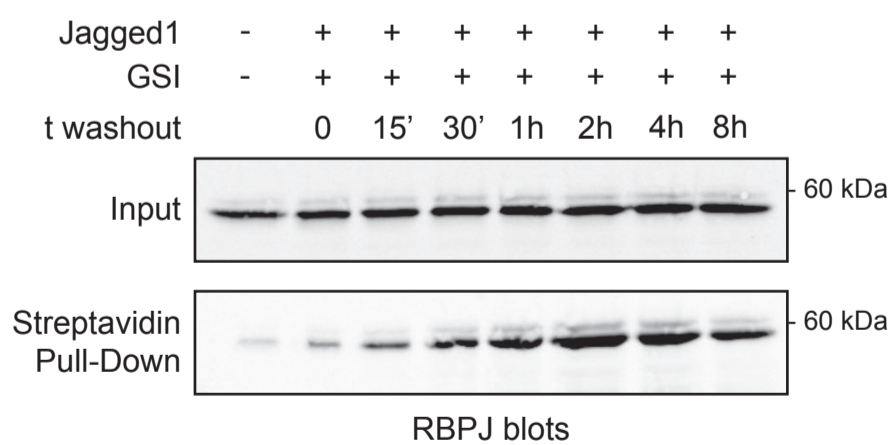

**A**

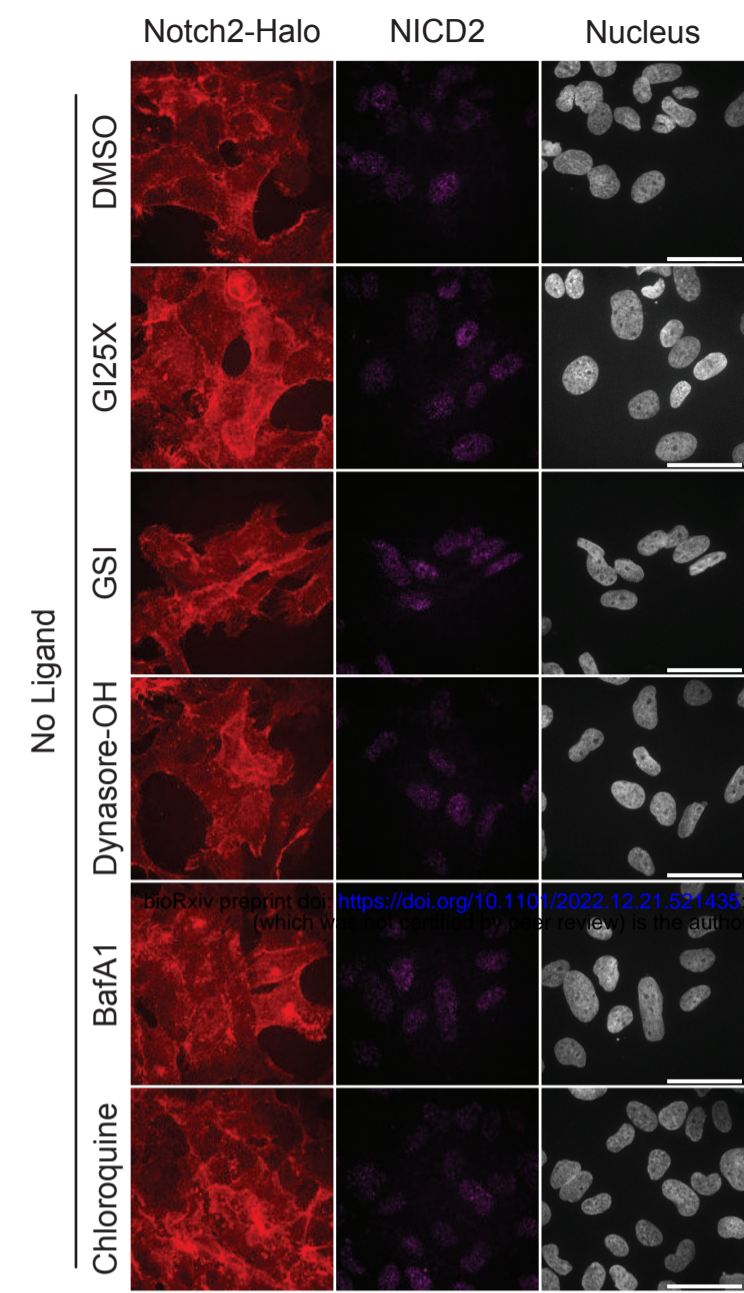

**B**

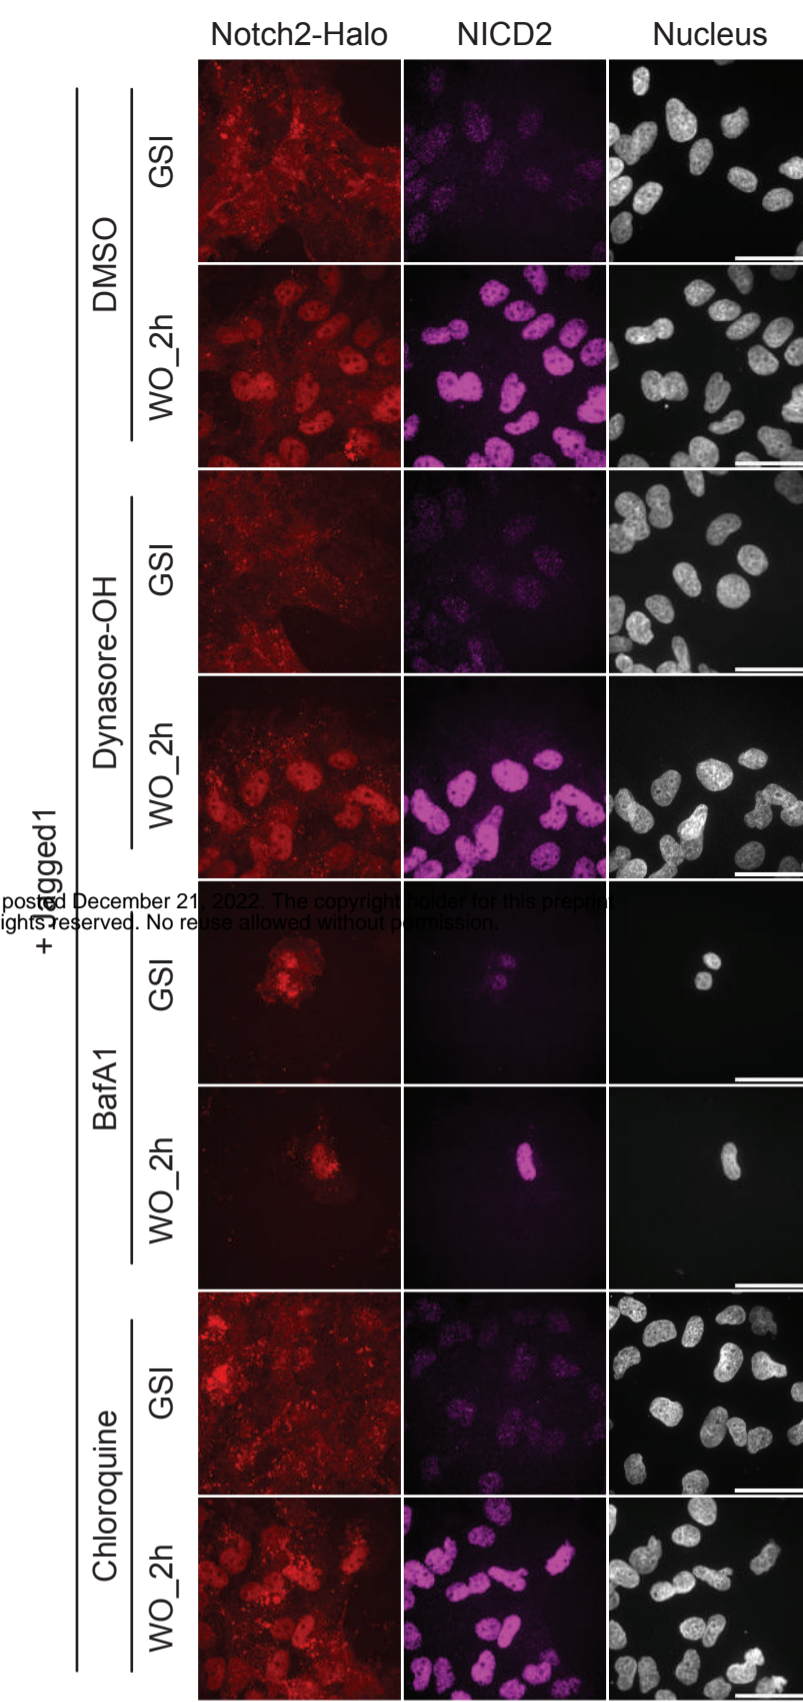

bioRxiv preprint doi: <https://doi.org/10.1101/2022.12.21.521435>; this version posted December 21, 2022. The copyright holder for this preprint (which was not certified by peer review) is the author/funder. All rights reserved. No reuse allowed without permission.

**A**

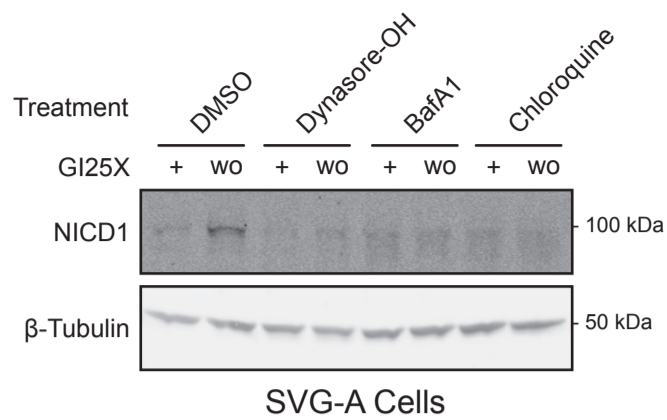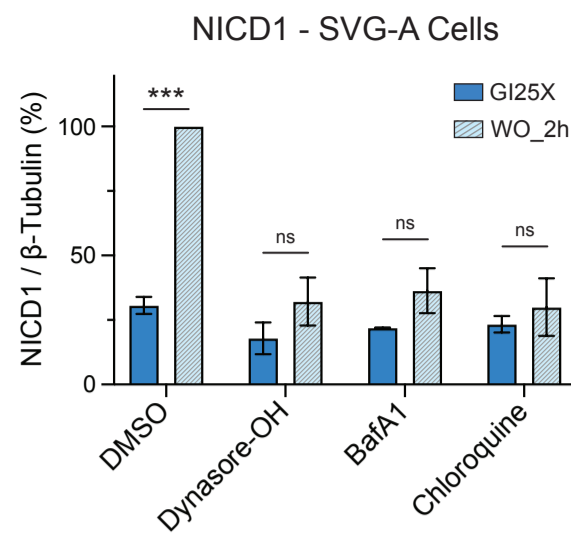

**B**

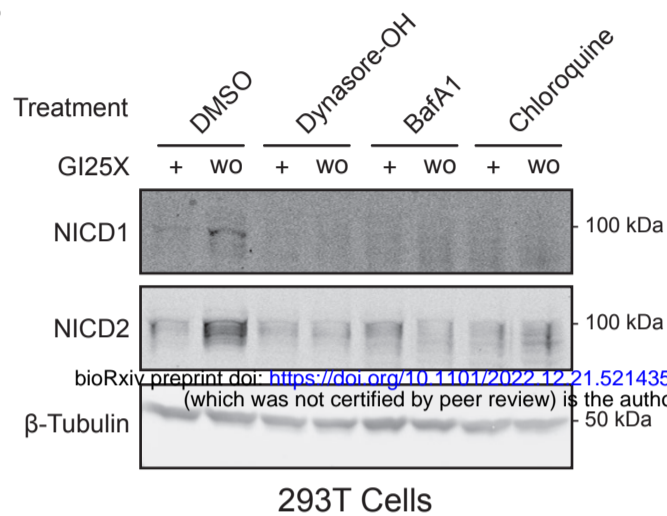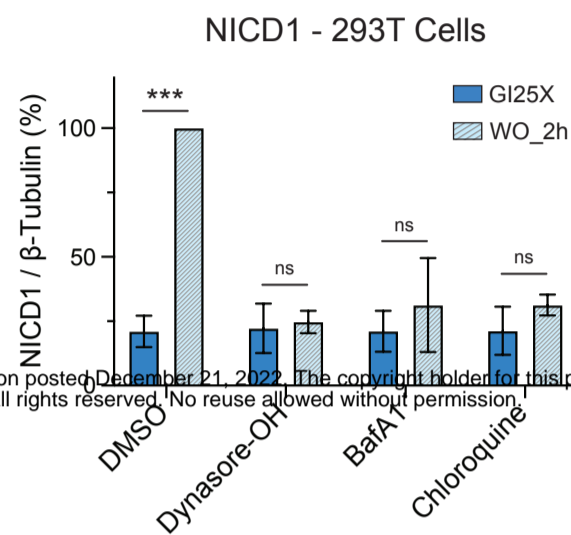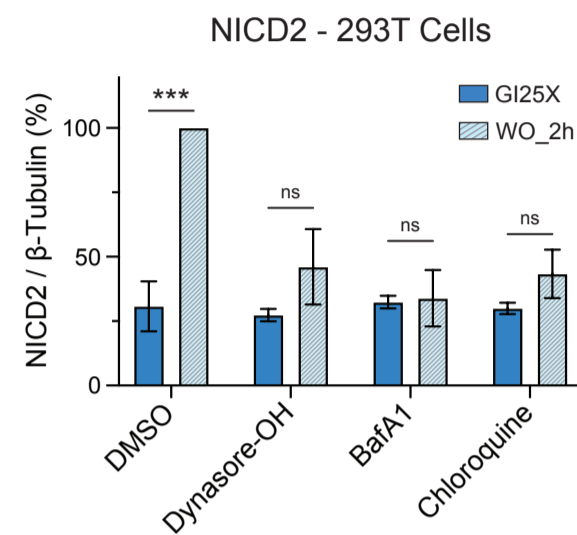

bioRxiv preprint doi: <https://doi.org/10.1101/2022.12.21.521435>; this version posted December 21, 2022. The copyright holder for this preprint (which was not certified by peer review) is the author/funder. All rights reserved. No reuse allowed without permission.

**C**

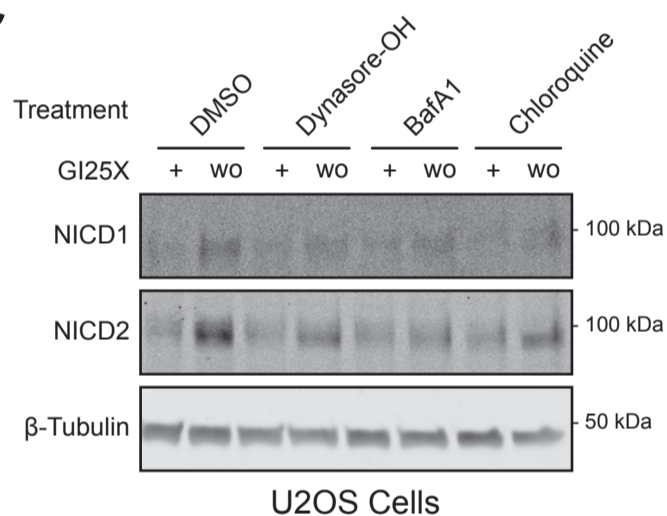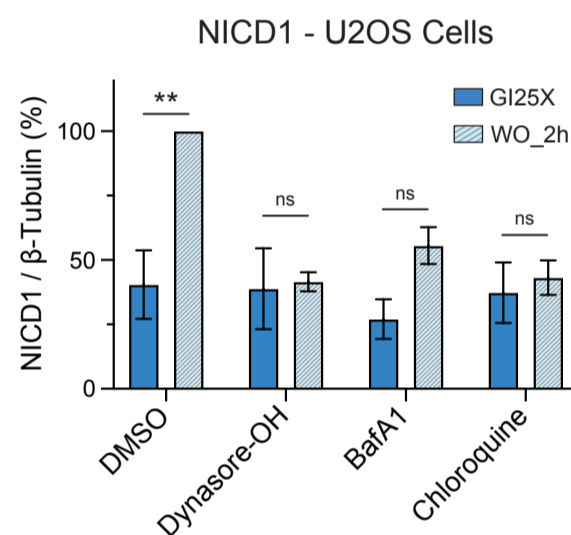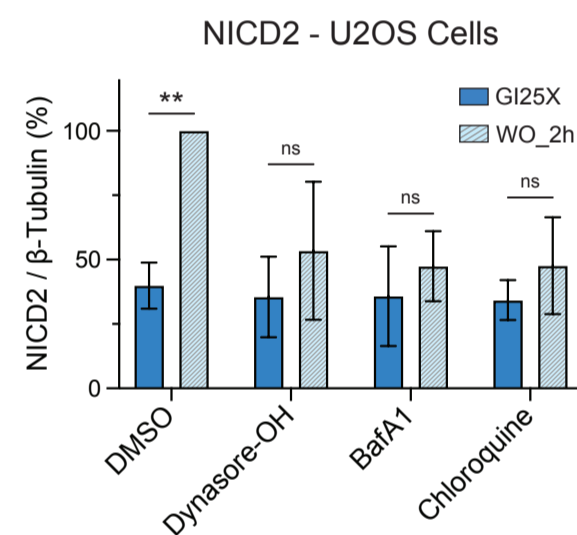

**D**

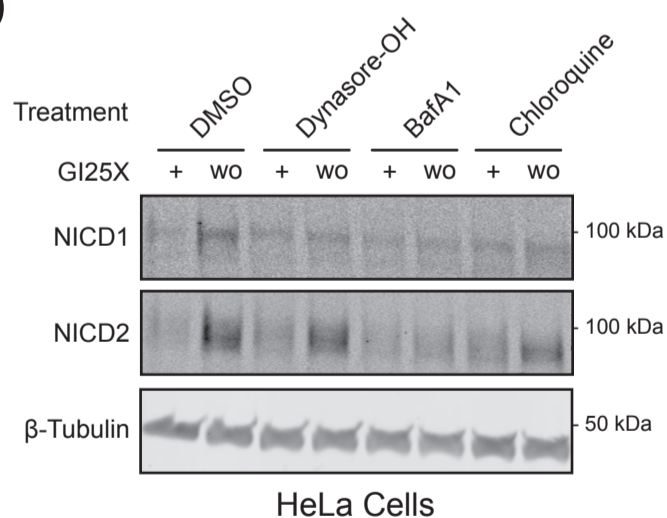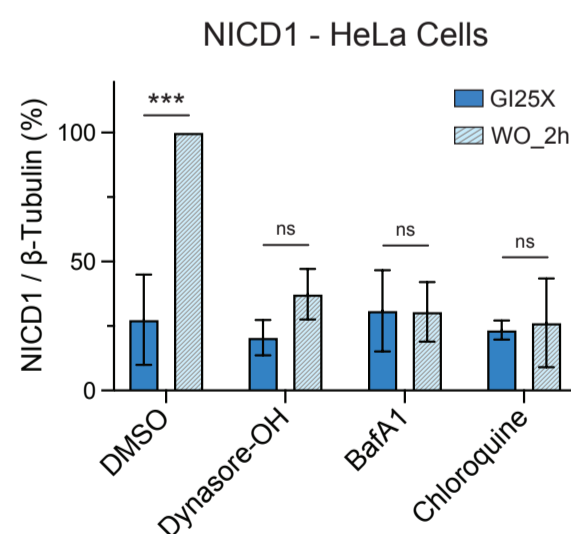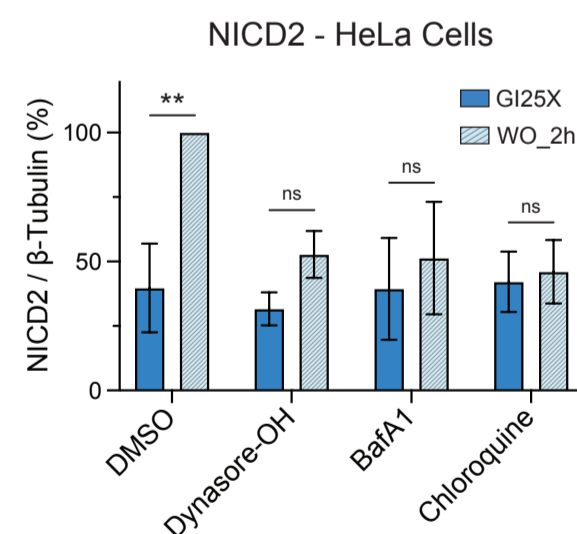

**E**

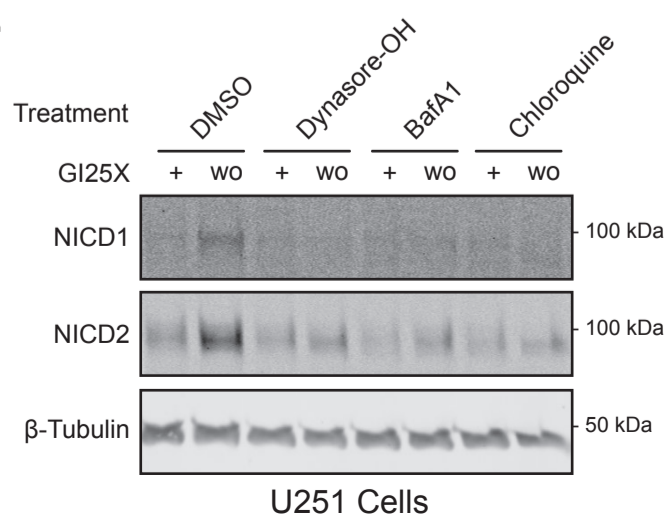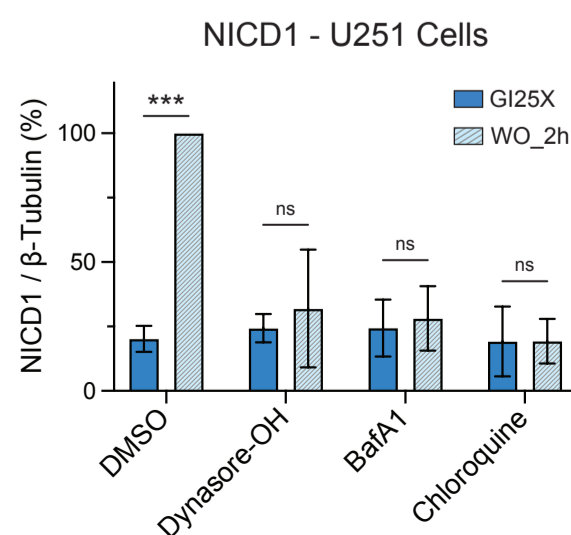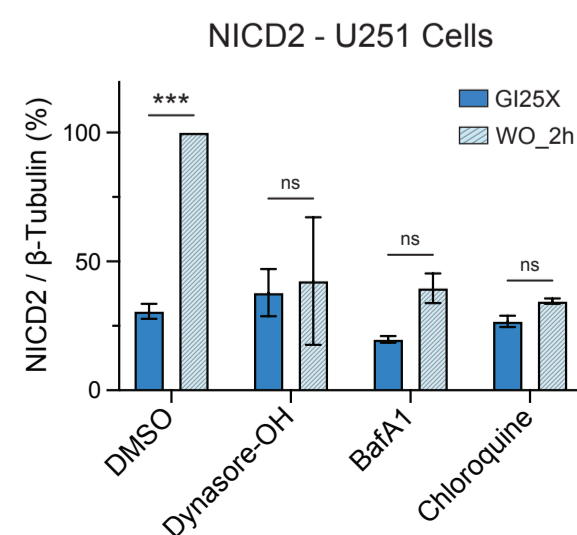

Supplemental Figure 6

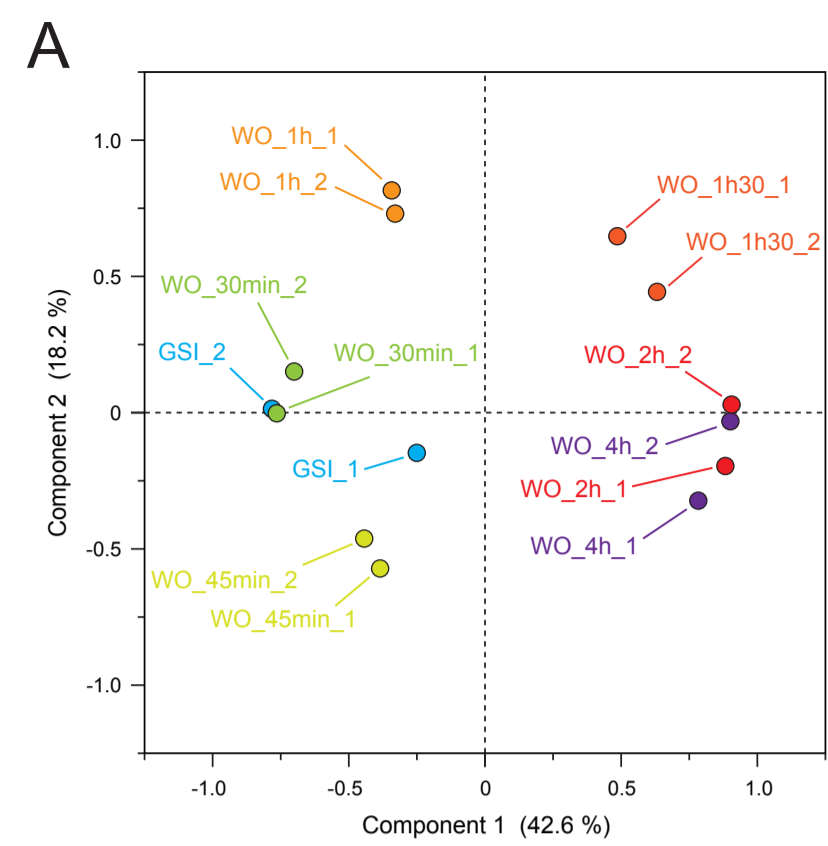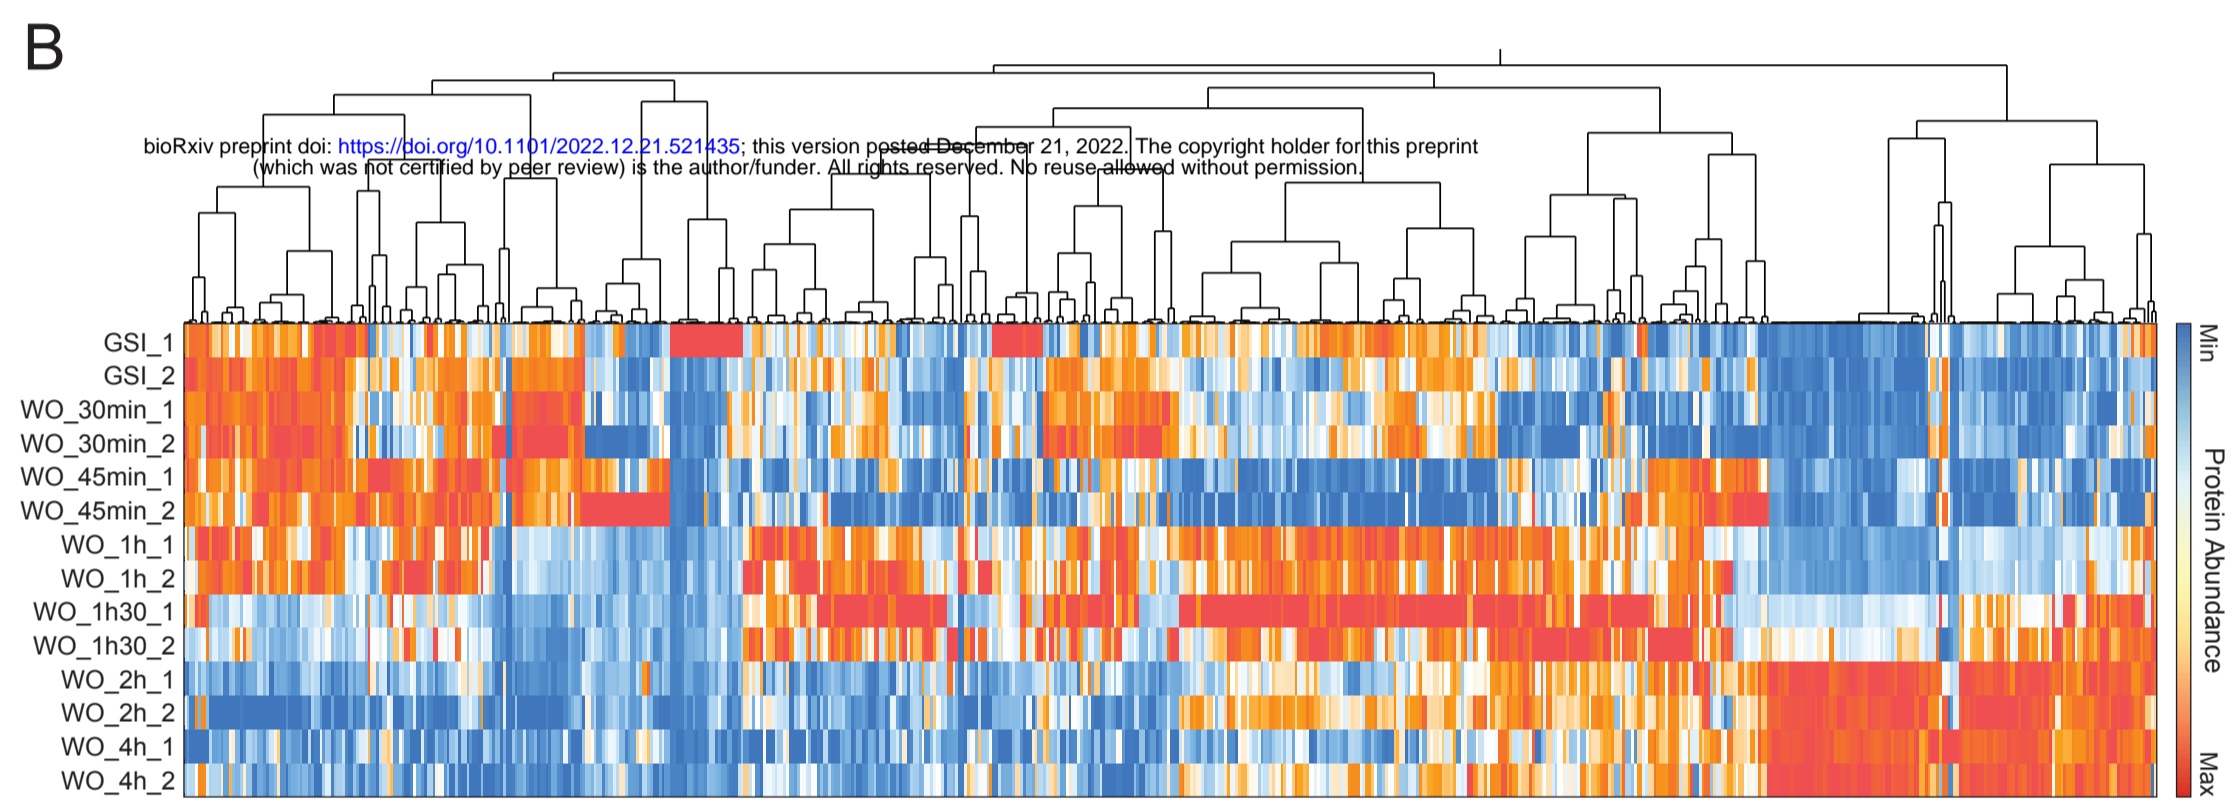

Source: https://www.biorxiv.org/content/10.1101/2022.12.21.521435v1.full.pdf
